# Supplementary material for: Metabolomics analysis provides new insights into the medicinal value of flavonoids in tobacco leaves
Source: Royal Society of Chemistry journal article supplement (doi:10.1039/d1mo00092f), 2021-05-26
Supplement: d1mo00092f2.xlsx [file d1mo00092f2.xlsx]

## Sheet: Table S5
All detected metabolites
Number	Index	Q1 (Da)	Q3 (Da)	Rt (min)	Molecular Weight (Da)	Ionization model	Compounds	Class	mix01	mix02	mix03	D-HD-1	D-HD-2	D-HD-3	D-K326-1	D-K326-2	D-K326-3	D-Y87-1	D-Y87-2	D-Y87-3	K326-1	K326-2	K326-3	Y87-1	Y87-2	Y87-3	HD-1	HD-2	HD-3	KEGG ID
1	pme3033	104	86	0.76	103.06	[M+H]+	N,N-Dimethylglycine	Amino acid and derivatives	17900	35300	37200	9	20300	9	9	9	9	21900	29800	9	91300	81800	162000	148000	163000	143000	2841100	3531600	3710100	C01026
2	pme2049	103	57	1.56	104.05	[M-H]-	2-Hydroxybutanoic acid	Organic acids and derivatives	1290000	1380000	1400000	1090000	4900000	1060000	1940000	1910000	1980000	1410000	1660000	819000	320000	477000	626000	227000	179000	387000	614850	670850	314040	C05984
3	pme2122	112.1	95	0.84	111.08	[M+H]+	Histamine	Amino acid and derivatives	89600	138000	133000	85700	82500	115000	142000	90900	105000	85700	80000	87500	66400	85600	86600	84500	67800	82300	55897	62785	63886	C00388
4	pme0257	111	80	1.23	112.03	[M-H]-	Uracil	Nucleotide and derivates	1130000	1040000	887000	725000	599000	540000	1190000	1800000	860000	797000	811000	465000	1030000	971000	1730000	703000	846000	940000	210940	158700	129990	C00106
5	pmb1096	118	91	2.39	117	[M+H]+	Indole	Indole derivatives	494000	743000	537000	9	9	9	9	9	9	9	9	9	1050000	1310000	1000000	816000	767000	923000	52251	51552	40548	C00463
6	pme1730	117	59	0.74	118.03	[M-H]-	D-Erythronolactone	Organic acids and derivatives	214000	196000	189000	223000	243000	263000	289000	336000	245000	208000	222000	179000	118000	142000	149000	125000	155000	127000	30535	21390	48988	-
7	pme3096	118	74	1.34	119.02	[M-H]-	Aminomalonic acid	Organic acids and derivatives	3470000	3690000	3340000	5010000	2920000	4910000	2370000	1520000	2760000	1560000	1510000	2570000	7740000	4330000	7560000	3610000	3720000	3200000	978490	1106400	1182900	C00872
8	pma0134	121	93.1	1.16	120.04	[M+H]+	D(-)-Threose	Carbohydrates	46400000	48500000	45700000	46100000	42800000	32700000	44900000	44600000	50700000	43100000	41500000	38700000	45800000	48800000	50600000	45300000	39100000	37000000	9107.9	11581	3807.4	-
9	pme0243	131	87	1.86	132.04	[M-H]-	Glutaric acid	Organic acids and derivatives	3050000	3070000	3180000	4670000	3730000	3300000	2920000	2980000	3030000	2670000	3430000	3750000	2530000	2570000	2350000	1540000	1590000	1860000	465600	532370	416770	C00489
10	pme3034	131	69	1.94	132.04	[M-H]-	ethylmalonate	Organic acids and derivatives	122000	114000	124000	153000	132000	118000	131000	138000	125000	112000	145000	138000	99100	128000	129000	86700	90700	104000	45818	49334	40139	-
11	pme0226	131.1	114	0.78	132.05	[M-H]-	L-Asparagine	Amino acid and derivatives	4700000	4010000	3770000	2610000	7820000	2850000	3230000	4890000	3620000	3760000	3830000	3410000	3740000	4740000	5020000	5540000	5800000	4520000	276820	208450	208280	C00152
12	pme2268	138	94	0.79	137.05	[M+H]+	Trigonelline	Alkaloids	294000	273000	275000	196000	276000	111000	187000	227000	241000	211000	243000	112000	631000	389000	601000	334000	352000	391000	1898600	1696600	1438200	C01004
13	pme2828	140	99	0.63	139.03	[M+H]+	4-Nitrophenol	Others	63000	71300	75700	89100	52900	72800	79400	44200	87400	87600	81300	58200	31800	55700	61900	65200	35400	48200	1835400	1659600	2536500	C00870
14	pme3351	144.1	126	0.84	145.07	[M-H]-	Allysine(6-Oxo DL-Norleucine)	Amino acid and derivatives	330000	256000	282000	537000	359000	488000	281000	231000	387000	486000	388000	298000	214000	249000	386000	133000	126000	132000	19473	15513	24165	C04076
15	pme2380	145	101	1.14	146.02	[M-H]-	A-Ketoglutaric acid	Organic acids and derivatives	92900	98200	67000	9	9	9	54700	50200	9	9	9	64100	151000	127000	235000	163000	298000	407000	497250	435240	448120	-
16	pma6281	145.1	101.1	0.75	146.06	[M-H]-	Methylglutaric acid	Organic acids and derivatives	88100	79300	69300	59800	92400	67500	15900	31800	21900	52500	43900	51700	129000	124000	141000	125000	109000	109000	11186	7743.6	8410.2	-
17	pme0026	147	84	0.78	146.11	[M+H]+	L-(+)-Lysine	Amino acid and derivatives	57400	41600	60400	65800	45600	41700	96600	75500	73800	58700	60600	61100	53200	44400	50600	52600	56400	52300	3109800	2183800	2162400	C00047
18	pmb2826	147	87.1	1.03	148	[M-H]-	Citramalate	Organic acids and derivatives	2640000	2770000	2500000	3050000	4230000	4750000	2840000	1450000	3880000	6010000	6300000	3030000	950000	1280000	2610000	733000	1570000	206000	807010	1025600	980250	C00815
19	pme3154	147.1	59	1.22	148.07	[M-H]-	(Rs)-Mevalonic acid	Organic acids and derivatives	1210000	1240000	1170000	462000	1210000	579000	1130000	3460000	996000	636000	931000	607000	337000	480000	541000	481000	615000	669000	217910	254840	274670	-
20	pme0256	151	151	1.19	152.03	[M-H]-	Xanthine	Nucleotide and derivates	315000	279000	290000	307000	296000	228000	382000	595000	350000	332000	407000	384000	349000	101000	162000	160000	127000	135000	37942	35279	57388	C00385
21	pma0675	153	135	2.93	152.05	[M+H]+	o-Anisic acid	Organic acids and derivatives	27600	27000	13600	9	9	9	37400	9	28300	9	74500	58700	9	9	9	9	9	11900	76148	44929	48469	-
22	pmb3099	153	125	1.56	154	[M-H]-	Diethyl phosphate	Organic acids and derivatives	1210000	1360000	1370000	2410000	1590000	1930000	1790000	1090000	616000	1790000	1730000	1740000	1700000	805000	1370000	1890000	2000000	1600000	68016	65754	57370	C06608
23	pme2589	159.1	87	1.24	160.04	[M-H]-	Oxoadipic acid	Organic acids and derivatives	105000	118000	108000	73100	108000	49700	57500	78200	43000	40700	74600	45300	142000	199000	270000	272000	281000	280000	113190	129330	97724	C00322
24	pme0128	159.2	88	0.75	160.08	[M-H]-	D-Alanyl-D-Alanine	Amino acid and derivatives	187000	163000	148000	217000	317000	115000	190000	241000	150000	184000	112000	76400	133000	156000	242000	119000	140000	90800	9640.3	7173.9	7269.5	C00993
25	pme3382	160	98	1.16	161.07	[M-H]-	N-Acetylthreonine	Amino acid and derivatives	173000	202000	151000	152000	169000	105000	235000	269000	138000	126000	158000	66800	141000	106000	178000	171000	129000	123000	71212	77256	86162	-
26	pmf0608	161	133.1	4.15	162.03	[M-H]-	Umbelliferone	Phenylpropanoids	7360000	7310000	7250000	7320000	10200000	8890000	7200000	5050000	7590000	10900000	12100000	6460000	1510000	1220000	2290000	6350000	5720000	5930000	371600	345100	360330	C09315
27	pme2914	161	99	1.59	162.05	[M-H]-	3-Hydroxy-3-methylpentane-1,5-dioic acid	Amino acid and derivatives	4880000	5870000	5440000	6580000	3700000	4320000	5580000	8810000	5250000	4000000	4910000	4450000	4710000	5270000	7520000	5810000	3560000	4600000	1368600	1221900	1028600	C03761
28	pme2758	162	144	0.73	163.13	[M-H]-	4-Hydroxy-L-glutamic acid	Amino acid and derivatives	121000	114000	122000	9	9	15600	9	9	85800	46700	24000	97500	86500	100000	96900	121000	95300	123000	7863.1	10582	15430	C03079
29	pme2529	163.2	101	0.75	164.07	[M-H]-	1,5-Anhydro-D-glucitol	Alcohols	114000	128000	145000	178000	204000	167000	243000	302000	147000	148000	141000	112000	82300	77800	93300	93200	107000	107000	17694	20939	26715	C07326
30	pme3083	164	120	3.87	165.04	[M-H]-	2-(Formylamino)benzoic acid	Organic acids and derivatives	2240000	2240000	2300000	2810000	3520000	4010000	4190000	2620000	5800000	2200000	1920000	2780000	145000	173000	278000	94200	131000	207000	23284	17042	22476	-
31	pme0282	165	77	2.95	166.03	[M-H]-	Phthalic acid	Organic acids and derivatives	167000	172000	165000	158000	207000	99900	286000	309000	288000	116000	124000	158000	149000	173000	263000	140000	176000	167000	68806	48664	37489	C01606
32	pme0281	165	121	2.96	166.03	[M-H]-	Terephthalic acid	Organic acids and derivatives	4200000	4050000	4030000	3930000	3390000	3930000	5950000	5750000	5460000	2550000	4020000	4950000	4490000	4170000	4890000	4420000	4010000	4820000	473430	372700	307350	C06337
33	pme2801	167	150	1.85	166.05	[M+H]+	7-Methylxanthine	Nucleotide and derivates	37500	22500	37000	51700	52800	51700	23200	21300	42700	32200	21300	28700	27300	37200	26500	33000	23100	32200	9031.8	13709	9726	C16353
34	pmc0274	167.1	121.1	1.92	166.1	[M+H]+	6-Methylmercaptopurine	Nucleotide and derivates	16600000	20200000	21600000	9530000	12600000	9470000	2780000	2500000	4560000	10900000	9810000	12700000	35800000	41500000	28900000	29600000	25300000	32200000	3874900	4467400	3372400	C16614
35	pme3009	175	99	0.63	174.02	[M+H]+	trans-Citridic acid	Organic acids and derivatives	1080000	1140000	1120000	495000	1260000	1840000	9	9	720000	1720000	1650000	1330000	498000	512000	575000	969000	1440000	1210000	74215	63985	82448	-
36	pme2550	173	137	0.77	174.02	[M-H]-	Cis-Aconitic acid	Organic acids and derivatives	135000	137000	102000	67600	84300	76200	59700	32600	60700	87200	109000	49400	252000	290000	305000	152000	127000	144000	32297	33528	33852	C00417
37	pme0008	176.1	113	0.79	175.1	[M+H]+	L-Citrulline	Amino acid and derivatives	179000	179000	174000	109000	9	201000	9	68400	174000	181000	156000	158000	565000	475000	437000	408000	9	320000	83820	140380	82575	C00327
38	pmf0323	177.1	118	1.98	176.1	[M+H]+	(-)-Cotinine	Alkaloids	22100000	25400000	25300000	16500000	56800000	27600000	42200000	48400000	25600000	15700000	24200000	8610000	14800000	23500000	26900000	13800000	18700000	20300000	1626200	1153800	954030	-
39	pmb3101	175.1	115	2.75	176.1	[M-H]-	2-Isopropylmalate	Organic acids and derivatives	2300000	2410000	2270000	2260000	5800000	2290000	1250000	824000	2580000	2180000	5290000	1920000	1400000	1660000	2070000	1100000	1260000	1970000	4700600	4353400	3529700	C02504
40	pme2253	177.1	59	0.79	178.05	[M-H]-	L-Gulonic-γ-lactone	Others	129000	147000	192000	9	9	9	9	9	9	9	9	327000	173000	233000	248000	174000	166000	177000	33338	31975	58378	C01040
41	pme1021	177.1	99	0.86	178.05	[M-H]-	D-(+)-Glucono-1,5-lactone	Carbohydrates	372000	331000	353000	576000	377000	332000	696000	637000	348000	384000	239000	353000	257000	249000	251000	222000	262000	186000	22180	22793	18323	C00198
42	pmf0606	177	133.1	7.19	178.05	[M-H]-	Pectin (Technical Grade)	Others	680000	676000	678000	728000	372000	520000	374000	528000	448000	1200000	589000	1510000	672000	511000	761000	1110000	838000	446000	37230	41920	35542	-
43	pmb2795	177	145	5.5	178	[M-H]-	4-Methoxycinnamic acid	Phenylpropanoids	140000	143000	149000	132000	197000	138000	138000	68000	150000	83900	124000	57100	55300	46400	132000	40400	60200	73800	23197	13595	19437	-
44	pme3255	179	123	7.16	178.1	[M+H]+	Methyleugenol	Phenylpropanoids	392000	493000	472000	9	9	9	9	9	9	699000	729000	9	640000	766000	621000	821000	785000	791000	37488	45334	39648	C10454
45	pmb0786	180	162	0.69	179	[M+H]+	Glucosamine	Carbohydrates	3870000	3900000	2790000	3570000	4180000	5820000	2640000	4970000	7150000	5850000	8500000	4420000	1210000	905000	559000	1620000	2140000	3360000	1511900	1343000	1229000	C00329
46	pme0516	179.2	87	0.74	180.06	[M-H]-	Inositol	Alcohols	6600000	6100000	6190000	11600000	9360000	10300000	10500000	7880000	8080000	7300000	5450000	5180000	3000000	3850000	4220000	2750000	4960000	3120000	1008200	778960	1003100	C00137
47	pme0075	188.1	128	1.18	189.06	[M-H]-	N-Acetyl-L-glutamic acid	Amino acid and derivatives	462000	563000	522000	1250000	1060000	862000	673000	809000	651000	634000	600000	401000	199000	142000	131000	129000	144000	125000	23770	18993	27500	C00624
48	pme3705	193.1	73	0.72	194.04	[M-H]-	D-glucoronic acid	Others	1180000	1220000	1250000	1670000	1620000	1910000	1480000	1530000	1090000	1320000	1460000	796000	1040000	1150000	1190000	755000	1010000	754000	182900	142610	167490	C00191
49	pmb0423	195.1	145.3	3.22	194.1	[M+H]+	Hydroxy-methoxycinnamate	Phenylpropanoids	4550000	4510000	4610000	2260000	1110000	2070000	4170000	6780000	3510000	3100000	796000	8620000	9750000	5130000	11000000	4020000	4020000	5680000	9716.3	8584.3	10313	-
50	pme0422	193.1	134	4.08	194.06	[M-H]-	3-Hydroxy-4-methoxycinnamic acid	Phenylpropanoids	21200000	20900000	21300000	43000000	14800000	27000000	34700000	40900000	43300000	28000000	20800000	37400000	224000	198000	260000	157000	133000	161000	71128	65904	60776	-
51	pme0534	195.2	74.9	0.63	196.06	[M-H]-	Gluconic acid	Others	8350000	8710000	8200000	16500000	21500000	12200000	27100000	43700000	14100000	9230000	9570000	4380000	2250000	3700000	5320000	2590000	4260000	1720000	427660	345250	432030	C00257
52	pmb0818	206.1	147.5	2.39	205.1	[M+H]+	Methoxyindoleacetic acid	Indole derivatives	33900000	37000000	37300000	12500000	21100000	13000000	2730000	3990000	5520000	17800000	16200000	17000000	64300000	71900000	81200000	61600000	55700000	70600000	21041	26702	16691	C05660
53	pme3443	207.1	192	4.61	208.07	[M-H]-	Sinapinaldehyde	Phenylpropanoids	244000	220000	208000	114000	218000	161000	77300	180000	88200	191000	162000	218000	215000	238000	237000	486000	355000	317000	45624	39731	41218	-
54	pmb2620	207.1	133.1	5.52	208.1	[M-H]-	3,4-Dimethoxycinnamic acid	Phenylpropanoids	1850000	1830000	1770000	6840000	2490000	2260000	1260000	635000	413000	3720000	3510000	1310000	9	9	9	9	9	9	8538	6380.8	9307	-
55	pmb2507	213.1	97	0.92	214.1	[M-H]-	2-Deoxyribose 1-phosphate	Others	159000	193000	215000	383000	474000	234000	243000	134000	198000	168000	348000	79700	9	36200	9	25700	41900	40500	90045	92918	56460	C00672
56	pmb2873	214.1	134	3.65	215.1	[M-H]-	3-(2-Naphthyl)-D-alanine	Amino acid and derivatives	499000	525000	509000	304000	1210000	460000	361000	229000	882000	428000	264000	573000	656000	444000	1330000	424000	633000	485000	41257	36355	31062	-
57	pmb0426	219.1	174.4	3.84	218.1	[M+H]+	5-Methoxy-N,N-dimethyltryptamine	Alkaloids	525000	392000	428000	306000	393000	414000	395000	272000	438000	436000	439000	434000	775000	560000	512000	619000	505000	453000	27384	30018	26506	C08309
58	pme1228	221.1	204	1.66	220.09	[M+H]+	5-Hydroxy-L-tryptophan	Amino acid and derivatives	728000	674000	639000	9	9	9	9	9	9	9	9	9	1590000	1270000	1420000	832000	1110000	1120000	135940	176020	125730	C00643
59	pme2755	222	144	0.62	221.09	[M+H]+	N-Acetyl-D-glucosamine	Carbohydrates	477000	791000	608000	285000	204000	406000	630000	377000	711000	640000	823000	9	432000	399000	192000	330000	9	411000	915880	839890	893850	C00140
60	pmb0490	235.1	146.8	2.29	234.1	[M+H]+	N-p-Coumaroyl putrescine	Phenolamides	1660000	2540000	2240000	9	747000	211000	9	9	9	9	9	9	8270000	12300000	8940000	1850000	767000	1350000	127920	151750	91202	C18326
61	pme2827	239	223	6.77	240.25	[M-H]-	Palmitaldehyde	Lipids	35200000	43900000	33900000	3680000	1590000	5860000	3970000	2210000	1880000	5810000	1960000	2400000	1940000	1840000	1960000	4230000	7760000	4850000	5919700	5325100	6326400	C00517
62	pmb2591	245	203.2	3.87	246	[M-H]-	Acetyl tryptophan	Amino acid and derivatives	4290000	4390000	4350000	2530000	10500000	6170000	1670000	1500000	2140000	6420000	9510000	4230000	1460000	814000	1720000	2220000	3010000	3660000	12996000	8807200	7307000	C03137
63	pma1840	250	147	2.73	250	Protonated	Coumaroyl choline	Alkaloids	334000	365000	324000	189000	407000	324000	9	222000	9	185000	9	9	672000	691000	1060000	333000	359000	303000	24373	35900	21483	-
64	pme3961	252	136	1.88	251.1	[M+H]+	Deoxyadenosine	Nucleotide and derivates	1540000	1600000	1550000	1940000	1450000	2000000	1500000	2020000	1790000	3150000	1980000	2940000	662000	642000	959000	543000	497000	594000	92311	60976	55122	C00559
65	pma3101	256.2	124.1	0.84	255.2	[M+H]+	Nicotinate ribonucleoside	Vitamins and derivatives	20900000	16600000	15500000	6170000	8640000	12800000	3870000	7820000	5150000	12100000	11500000	8800000	34000000	35500000	50300000	26000000	32600000	28800000	5211300	4263000	4600000	C05841
66	pme3313	259	97	0.83	260.03	[M-H]-	D-Fructose 6-phosphate	Carbohydrates	1560000	1660000	1570000	2260000	1250000	1630000	3570000	2820000	2100000	1580000	1500000	618000	1220000	1130000	1130000	2040000	2900000	1770000	1183600	1210300	1041300	C00085
67	pmb0896	265.1	177.5	2.33	264.1	[M+H]+	N'-Feruloyl putrescine	Phenolamides	18300000	26300000	21700000	9	3910000	513000	9	9	9	88300	215000	9	85200000	96400000	124000000	7010000	2050000	3690000	214120	120360	120240	-
68	pmb0907	265.1	177.1	2.29	264.1	[M+H]+	N-Feruloyl putrescine	Phenolamides	758000	944000	1010000	9	161000	41400	9	9	9	9	9	9	4510000	5470000	7320000	352000	85300	196000	3021100	1851100	1563000	C10497
69	pma2172	268	121	5.94	267	[M+H]+	Cinnamoyl tyramine	Alkaloids	223000	254000	281000	403000	301000	1780000	9	9	77600	93900	149000	387000	144000	106000	9	83400	116000	182000	11005	10882	11329	-
70	pme2890	269	136	0.85	268.06	[M+H]+	L-Homocystine	Amino acid and derivatives	255000	206000	253000	244000	1200000	200000	123000	121000	204000	460000	456000	135000	92500	89200	93300	115000	211000	168000	57000	77319	43831	C01817
71	pme0376	271.1	151	5.59	272.07	[M-H]-	Naringenin	Flavanone	483000	476000	462000	382000	357000	399000	184000	177000	144000	583000	773000	277000	634000	914000	592000	402000	378000	310000	57021	56102	49448	C00509
72	pmb1650	279.2	149.4	9.71	278.2	[M+H]+	Octadeca-11E,13E,15Z-trienoic acid	Lipids	11100000	8420000	8410000	5150000	6330000	6530000	6910000	6640000	11200000	7060000	7080000	7680000	8400000	10600000	11500000	9060000	8210000	10300000	55113	53759	56345	-
73	pmb0889	279.3	95.1	8.96	278.3	[M+H]+	Punicic acid	Lipids	635000	620000	595000	320000	477000	468000	1820000	1940000	1710000	306000	403000	212000	70200	76700	108000	71100	106000	83300	109740	148410	119670	C08364
74	pme1662	287.1	167	6.96	286.08	[M+H]+	sakuranetin	Flavone	752000	804000	821000	301000	583000	833000	826000	749000	518000	965000	1040000	654000	717000	707000	710000	616000	652000	769000	17738	21032	14896	C09833
75	pme2289	287.2	119	11	286.23	[M+H]+	Vitamin A	Vitamins and derivatives	1510000	1140000	1640000	9	3340000	9	9	925000	9	1840000	2280000	9	9	1080000	1140000	908000	1060000	779000	305270	435740	284590	C00473
76	pmb3081	289.1	97	1.08	290.1	[M-H]-	Glucarate O-Phosphoric acid	Others	156000	156000	154000	55300	99800	64200	145000	96700	138000	143000	141000	95200	151000	140000	155000	196000	260000	127000	3459900	2472600	1487700	-
77	pmb2657	289.1	97.1	0.71	290.1	[M-H]-	Argininosuccinate	Organic acids and derivatives	261000	275000	255000	112000	157000	121000	261000	255000	211000	281000	297000	200000	235000	226000	254000	333000	531000	235000	224890	216060	222750	C03406
78	pmb0494	295	206.9	2.77	294	[M+H]+	N-Sinapoyl putrescine	Phenolamides	221000	356000	271000	9	9	9	9	9	9	9	9	9	678000	747000	1040000	799000	848000	965000	34529	48803	32755	-
79	pmb2792	293	193.1	7.81	294	[M-H]-	13-HOTrE(r)	Lipids	344000	335000	338000	301000	193000	231000	228000	382000	367000	334000	261000	438000	283000	384000	277000	436000	302000	236000	10671	8661.8	11288	-
80	pmb2786	293	275	8.42	294	[M-H]-	9-HOTrE	Lipids	22200000	21500000	21000000	24100000	18900000	23500000	45700000	42500000	44700000	15200000	17100000	12200000	1420000	1860000	2080000	1030000	1490000	1180000	480090	689540	660380	-
81	pma3606	295.2	179.2	9.22	294.2	[M+H]+	9-Hydroxy-(10E,12Z,15Z)-octadecatrienoic acid	Lipids	8750000	7590000	8450000	3090000	3090000	5820000	31500000	26800000	25700000	2390000	5610000	2020000	1210000	744000	906000	613000	1190000	972000	458560	576850	471890	-
82	pmb2778	295	277.3	8.96	296	[M-H]-	9,10-EODE	Lipids	45300000	43400000	39400000	24200000	38100000	30300000	101000000	108000000	96300000	25900000	31600000	15100000	5760000	5940000	9090000	4780000	7840000	6070000	1302100	1984400	1565100	-
83	pme1474	298	136	2.9	297.09	[M+H]+	5'-Deoxy-5'-(methylthio)adenosine	Nucleotide and derivates	864000	1010000	959000	23200	60500	9	9	9	9	337000	365000	133000	3140000	3360000	3570000	1360000	1420000	1480000	3996200	5785800	4120700	C00170
84	pmb0197	298.1	166.3	1.16	297.1	[M+H]+	N2-methylguanosine	Nucleotide and derivates	435000	466000	311000	674000	909000	668000	113000	184000	243000	545000	517000	618000	335000	284000	318000	250000	223000	317000	33590	40921	31490	-
85	pmf0297	297.3	183.1	9.29	298.32	[M-H]-	1-Eicosanol	Lipids	9200000	8890000	8240000	5260000	4910000	5200000	4100000	4330000	4040000	4840000	5060000	5150000	4930000	7030000	6240000	4850000	6060000	3670000	17132	23834	21280	-
86	pmc1990	299.1	223.1	6.78	300.1	[M-H]-	4'-Hydroxy-5,7-dimethoxyflavanone	Flavanone	130000	164000	111000	13100	5180	20100	9640	10700	5610	17300	6070	6450	9240	8250	7610	9120	25000	16000	1735300	1498700	2190500	-
87	pme1600	303.1	167	6.28	302.08	[M+H]+	7-O-Methyleriodictyol	Flavanone	1050000	1070000	1070000	9	9	315000	9	9	9	686000	574000	364000	2140000	2210000	2470000	1510000	1630000	1860000	94976	118260	86544	-
88	pmb0496	307.2	177.2	2.78	306.2	[M+H]+	N-Feruloyl agmatine	Phenolamides	887000	1070000	1040000	626000	848000	783000	450000	565000	768000	1130000	664000	631000	1520000	1060000	2120000	2400000	902000	1730000	151880	127900	174680	C18325
89	pmb2855	307	145	0.77	308	[M-H]-	L-Glutamine O-hexside	Amino acid and derivatives	1110000	1160000	984000	2110000	2770000	3330000	838000	1230000	1040000	3180000	2980000	2310000	9	7860	18000	5830	14000	6180	30276	23987	8279	-
90	pmb2857	308.1	146.1	0.8	309.1	[M-H]-	L-Glutamic acid O-glucoside	Amino acid and derivatives	5740000	5130000	4990000	12800000	10500000	13700000	7320000	10200000	6950000	10200000	10900000	7790000	9	50500	84000	9	49300	9	19068	17654	17451	-
91	pmb2789	309	209	7.54	310	[M-H]-	13-HpOTrE(r)	Lipids	22600	22700	20600	38200	29700	67000	144000	151000	119000	23600	30600	19700	4680	9	9	7400	9440	7060	24698	9297.4	7489.5	-
92	pmb2791	309.1	209.1	7.55	310.1	[M-H]-	9-HpOTrE	Lipids	1550000	1590000	1510000	1270000	843000	2000000	5110000	4040000	4220000	1120000	1450000	687000	64200	51000	48200	55300	46600	30400	28804	24313	25029	-
93	pme3967	312	180	2.18	311.12	[M+H]+	2-(dimethylamino)guanosine	Nucleotide and derivates	4280000	4350000	4970000	7330000	7340000	5670000	4000000	4860000	5980000	5740000	6240000	6530000	2160000	1780000	2320000	1420000	1470000	1800000	139400	139140	135630	-
94	pmb2933	311.1	149.1	2.16	312.1	[M-H]-	Caftaric acid	Phenylpropanoids	731000	780000	757000	9	64900	9	9	9	9	85600	83200	57500	2620000	3070000	3880000	1910000	1740000	2170000	224530	351440	224760	-
95	pmb2804	311.1	171.3	7.87	312.1	[M-H]-	13-HPODE	Lipids	1660000	1650000	1610000	1370000	3650000	1790000	1230000	1250000	1470000	3340000	3600000	1530000	147000	98300	147000	103000	167000	248000	69757	85939	72592	C04717
96	pmb2871	315.1	153	1.84	316.1	[M-H]-	2,5-dihydroxy benzoic acid O-hexside	Organic acids and derivatives	40000000	41900000	37100000	39500000	31500000	42100000	44100000	60400000	39000000	37500000	32300000	36000000	34800000	38100000	43700000	39500000	51600000	47300000	5895900	4513300	5561800	-
97	pmb0751	321.1	147.3	3.81	320.1	[M+H]+	5-O-p-Coumaroyl shikimic acid	Organic acids and derivatives	372000	286000	314000	191000	323000	235000	243000	268000	410000	172000	207000	307000	360000	241000	840000	300000	299000	460000	73617	35859	63085	-
98	pmb3075	319	145.1	3.93	320	[M-H]-	3-O-p-Coumaroyl shikimic acid	Organic acids and derivatives	137000	156000	160000	58400	195000	79500	124000	75600	184000	57000	79400	116000	201000	97300	534000	99700	159000	233000	62192	18446	47489	-
99	pme3188	323	211	1.18	324.04	[M-H]-	Uridine 5'-monophosphate	Nucleotide and derivates	2330000	2560000	2230000	2170000	7690000	1300000	6810000	10000000	3430000	1480000	3180000	1520000	146000	205000	273000	1030000	1820000	1470000	64971	76177	41924	C00105
100	pme3184	332	136	1.17	331.07	[M+H]+	2'-Deoxyadenosine-5'-monophosphate	Nucleotide and derivates	705000	742000	668000	1190000	483000	806000	423000	519000	558000	863000	651000	616000	726000	746000	897000	804000	1010000	799000	59215	38364	39887	C00360
101	pmc0066	333.1	137.1	0.7	332.05	[M+H]+	2'-Deoxyinosine-5'-monophosphate	Nucleotide and derivates	204000	224000	196000	149000	80800	103000	160000	191000	135000	174000	169000	128000	279000	287000	408000	280000	302000	292000	8163.5	11731	19754	C06196
102	pmb3074	337.1	191.1	3.3	338.1	[M-H]-	3-O-p-Coumaroyl quinic acid	Organic acids and derivatives	2600000	3050000	2900000	3000000	3020000	4960000	1330000	1240000	2520000	2240000	2590000	3470000	3690000	4130000	5230000	2540000	2940000	2260000	1275100	975690	1126400	-
103	pma6460	337	163.1	3.26	338	[M-H]-	5-O-p-Coumaroylquinic acid	Organic acids and derivatives	4800000	5160000	4830000	4790000	6160000	6770000	5600000	3910000	7510000	4970000	6590000	4210000	3470000	4030000	5600000	1770000	2060000	2060000	436190	302210	322760	-
104	pma0149	341.1	207.1	2.28	340.08	[M+H]+	Sinapoyl malate	Organic acids and derivatives	324000	369000	442000	332000	779000	298000	356000	421000	426000	402000	391000	525000	219000	149000	177000	162000	168000	217000	21277	34181	25453	C02887
105	pma6561	341	135	2.86	342	[M-H]-	Caffeic acid O-glucoside	Phenylpropanoids	12100000	12700000	11500000	21900000	10500000	17000000	13400000	16000000	10400000	7050000	7440000	7200000	12600000	14400000	13400000	8350000	8490000	8950000	3242100	3072400	2829300	-
106	pme0519	341	119	0.8	342.12	[M-H]-	D-(+)-Sucrose	Carbohydrates	728000	735000	673000	763000	646000	869000	694000	400000	783000	896000	867000	1050000	451000	637000	712000	642000	836000	470000	2843600	2071000	2861500	-
107	pmb0801	346	184.1	1.58	345	[M+H]+	4-Pyridoxic acid O-hexoside	Vitamins and derivatives	2230000	2110000	2600000	3510000	2890000	2200000	1790000	2620000	2300000	2150000	1940000	1520000	1290000	1180000	1790000	2380000	2920000	2870000	167590	137850	117970	-
108	pmb0981	348.2	136	1.16	347.2	[M+H]+	Adenosine 5'-monophosphate	Nucleotide and derivates	616000	623000	591000	228000	294000	146000	1970000	2200000	870000	571000	714000	564000	203000	235000	262000	173000	406000	177000	39365	20878	30349	C00020
109	pmb0149	351	147.1	6.73	350	[M+H]+	MAG (18:4) isomer1	Lipids	484000	483000	500000	9	9	9	2150000	2220000	1820000	9	9	9	9	9	9	9	9	9	9514.9	11369	7629	-
110	pmb2444	353.2	261.3	10.06	352.2	[M+H]+	MAG (18:3) isomer1	Lipids	1610000	1350000	1270000	1090000	1230000	1070000	526000	425000	888000	1200000	779000	1890000	3560000	2710000	2060000	1630000	1570000	1520000	5599300	6614100	6848900	-
111	pme1816	353	191	2.35	354.1	[M-H]-	Neochlorogenic acid (5-O-Caffeoylquinic acid)	Organic acids and derivatives	27800000	27600000	26400000	25400000	27400000	28600000	25100000	19500000	27700000	30000000	30900000	25200000	17400000	15700000	26400000	23000000	22900000	23900000	3442800	3373700	2652500	C17147
112	pmb0890	355.1	263.3	10.52	354.1	[M+H]+	MAG (18:2)	Lipids	403000	253000	271000	115000	244000	214000	104000	96100	171000	268000	243000	322000	683000	406000	387000	343000	319000	232000	761140	905150	1000800	-
113	pmb0296	357.2	265.4	8.97	356.2	[M+H]+	MAG (18:1) isomer2	Lipids	289000	330000	259000	233000	574000	308000	573000	429000	534000	217000	268000	435000	223000	43300	47500	65700	54700	67600	23526	31566	22098	-
114	pmb2363	357.2	265.3	8.76	356.2	[M+H]+	MAG (18:1) isomer1	Lipids	355000	316000	296000	278000	565000	325000	574000	506000	550000	218000	300000	478000	185000	53100	45600	88000	39800	69900	21126	38662	29592	-
115	pmb3107	359.1	182.1	2.26	360.1	[M-H]-	Syringic acid O-glucoside	Organic acids and derivatives	3020000	2830000	2910000	1080000	3110000	1510000	1560000	2550000	1160000	2190000	2430000	1530000	6220000	6430000	6260000	5190000	4770000	4720000	706730	771170	661370	-
116	pmb0964	366.2	204.1	0.8	365.2	[M+H]+	iP7G	Nucleotide and derivates	1350000	830000	834000	565000	453000	1130000	768000	726000	800000	573000	550000	855000	941000	752000	1520000	866000	1290000	906000	23333	26116	25487	-
117	pma3724	369.1	177.1	3.42	368.1	[M+H]+	1-O-Feruloyl quinic acid	Organic acids and derivatives	4630000	5390000	5360000	6120000	1900000	11900000	3350000	1800000	5400000	7690000	7640000	4210000	6250000	5480000	5110000	961000	757000	933000	8138500	8247000	7923000	-
118	pmb2940	385.1	205	3.26	386.1	[M-H]-	1-O-beta-D-Glucopyranosyl sinapate	Phenylpropanoids	13300000	13500000	13600000	8250000	5960000	8250000	8820000	13600000	7830000	14600000	10400000	15800000	10600000	8270000	10900000	36200000	34000000	31600000	8361600	6729300	7582500	-
119	pme2735	399.2	250	0.77	398.14	[M+H]+	S-(5'-Adenosyl)-L-methionine	Amino acid and derivatives	896000	1000000	713000	42500	58100	9	9	9	9	9	9	9	5000000	6290000	6170000	8300000	7400000	8400000	399020	419490	468130	C00019
120	pmc0281	400.2	136.1	1.94	399.2	[M+H]+	Adenosine O-ribose	Nucleotide and derivates	496000	641000	608000	10500000	62200	41900	37600	112000	53200	25500	26600	34400	19500	15900	33200	24100	24500	21200	237440	223060	155620	-
121	pme3007	403	159	0.7	404.16	[M-H]-	Uridine 5’-diphosphate	Nucleotide and derivates	79100	55000	60700	45800	19900	50300	48500	40100	37900	53800	49500	44200	87700	106000	80300	64700	65400	70500	31009	28677	29845	C00015
122	pma6625	405.1	243.1	4.63	406.13	[M-H]-	E-3,4,5'-Trihydroxy-3'-glucopyranosylstilbene	Others	378000	431000	377000	235000	347000	291000	358000	581000	266000	429000	348000	144000	226000	310000	183000	536000	787000	626000	23517	18048	19333	-
123	pmb2165	412.3	184	5.65	411.3	[M+H]+	LysoPC 10:0	Lipids	88100	81500	77300	56000	86900	54100	133000	211000	129000	93200	89400	9	97300	93200	117000	66300	92200	64900	9386.4	8402.2	9469.2	-
124	pmb0864	426.3	285.2	7.69	425.3	[M+H]+	LysoPE 14:0	Lipids	57800	33600	36800	38800	38600	40800	9	9	9	50500	49400	98100	45600	16500	21900	28600	25800	27600	16510	25190	18658	-
125	pmf0027	449.1	286.8	2.68	448.1	[M]+	Cyanidin 3-O-galactoside	Anthocyanins	4660000	4830000	5050000	9	4050000	9	9	1290000	9	1520000	1460000	9	12100000	10700000	30100000	3360000	3680000	4840000	170310	155200	108150	C08647
126	pmd0160	452.3	255.2	8.73	453.3	[M-H]-	LysoPE 16:0 (2n isomer)	Lipids	24500000	23400000	22900000	57700000	57200000	68800000	30000000	19100000	41300000	115000000	82700000	86500000	1890000	1360000	1940000	1830000	2260000	2620000	8052200	9863500	9202500	-
127	pmb0464	458.1	116.3	0.81	457.1	[M+H]+	Aspartic acid di-O-glucoside	Amino acid and derivatives	17900000	13400000	14000000	18200000	24800000	16100000	6750000	5390000	9310000	16800000	17100000	9890000	11000000	11000000	10800000	23700000	27000000	30400000	47668	33735	55058	-
128	pmf0203	463.1	301.1	2.94	498.09	[M-Cl]+	Peonidin 3-O-glucoside chloride	Anthocyanins	1680000	1810000	1840000	1490000	2330000	1400000	1990000	2490000	2020000	1710000	1760000	1410000	868000	964000	1150000	2380000	3280000	3450000	27593	37891	44400	-
129	pme3211	463	301	3.86	464.1	[M-H]-	Quercetin 3-O-glucoside (Isotrifoliin)	Flavonol	25700000	26400000	27600000	26000000	23500000	28300000	19800000	24400000	16600000	38000000	28400000	21000000	23500000	22400000	30600000	24400000	22700000	20900000	5275900	4724800	5322600	C05623
130	pmb2260	480.1	184.5	7.76	479.1	[M+H]+	LysoPC 15:1	Lipids	87800	89500	78500	80200	51000	114000	39200	60800	43800	131000	82300	84200	143000	53900	60800	56000	80200	66200	23454	28430	21604	-
131	pmb0883	482.1	341.7	9.86	481.1	[M+H]+	LysoPE 18:0	Lipids	260000	267000	221000	534000	587000	591000	172000	91900	240000	1130000	566000	1040000	328000	271000	265000	792000	1070000	955000	21761	23131	22766	-
132	pmb2319	482.3	184.1	8.26	481.3	[M+H]+	LysoPC 15:0	Lipids	1850000	2160000	2160000	2330000	1550000	1500000	395000	374000	326000	3750000	2970000	2150000	3850000	1070000	1350000	2390000	2710000	2400000	265100	323510	296290	-
133	pmb3072	481.1	319.3	3.23	482.1	[M-H]-	3-O-p-coumaroyl shikimic acid O-hexoside	Organic acids and derivatives	1210000	1250000	1070000	585000	744000	940000	714000	985000	760000	815000	715000	769000	2240000	2710000	2360000	1440000	1320000	1470000	94972	93785	84287	-
134	pmb3066	481.1	319.2	2.62	482.1	[M-H]-	5-O-p-coumaroyl shikimic acid O-hexoside	Organic acids and derivatives	507000	478000	513000	339000	629000	507000	511000	609000	850000	389000	516000	502000	402000	401000	412000	209000	205000	224000	18620	20694	19369	-
135	pmb0863	492.3	184	7.34	491.3	[M+H]+	LysoPC 16:2 (2n isomer)	Lipids	544000	581000	580000	1030000	534000	979000	391000	323000	538000	1010000	972000	903000	95800	116000	156000	82600	57500	88500	119370	131860	131630	-
136	pme0444	493.2	331	2.92	493.2	Protonated	Malvidin 3-O-glucoside (Oenin)	Anthocyanins	1900000	2410000	2330000	1740000	1830000	1540000	1250000	2320000	2130000	2560000	1650000	1520000	2460000	1880000	3310000	1950000	2450000	3130000	98560	142010	86515	C12140
137	pmb0855	496.3	184.2	8.8	495.3	[M+H]+	LysoPC 16:0	Lipids	2630000	3190000	3050000	5090000	5140000	5260000	4700000	3650000	3500000	11500000	8280000	6620000	453000	185000	292000	356000	330000	318000	26976000	34006000	33263000	-
138	pmd0132	496.3	184	8.8	495.33	[M+H]+	LysoPC 16:0 (2n isomer)	Lipids	2680000	2820000	3080000	4820000	4980000	4820000	4430000	3630000	3430000	10900000	8530000	6740000	436000	174000	243000	272000	199000	283000	18669000	23982000	19753000	-
139	pma0170	498.3	177.2	3.82	497.26	[M+H]+	N', N''-Diferuloylspermidine	Phenolamides	716000	754000	801000	9	9	247000	9	9	9	9	9	9	3430000	3780000	3040000	572000	142000	333000	13248	25401	16024	-
140	pmb3064	499.2	163.2	2.5	500.2	[M-H]-	3-O-p-coumaroyl quinic acid O-hexoside	Organic acids and derivatives	1900000	1800000	1740000	1820000	1150000	1940000	3140000	4890000	1950000	866000	869000	852000	1540000	2100000	2790000	1390000	1320000	1350000	69446	34141	41897	-
141	pmb3061	499.1	163.1	2.1	500.1	[M-H]-	5-O-p-coumaroyl quinic acid O-hexoside	Organic acids and derivatives	2030000	1990000	2000000	2010000	1310000	2140000	3660000	5440000	2080000	980000	944000	959000	1680000	2220000	3150000	1520000	1350000	1410000	162180	131920	94883	-
142	pma6499	509.3	347.1	3.41	508.3	[M+H]+	Limocitrin O-hexoside	Flavone	607000	480000	532000	774000	824000	489000	841000	865000	527000	254000	355000	428000	255000	148000	246000	445000	487000	790000	219130	201810	188910	-
143	pmb2406	510.1	184.4	9.34	509.1	[M+H]+	LysoPC 17:0	Lipids	22000000	25000000	26300000	36900000	38100000	35300000	24000000	18600000	24100000	79200000	72500000	43900000	6320000	4990000	6210000	6760000	8560000	10200000	156430	171670	149210	-
144	pmb0865	518.2	184.1	7.71	517.2	[M+H]+	LysoPC 18:3 (2n isomer)	Lipids	5260000	6180000	5900000	2520000	2770000	2070000	936000	976000	848000	4260000	3220000	3340000	20600000	6320000	6820000	10600000	13900000	12200000	19782000	18433000	17195000	-
145	pmb0854	518.3	459.3	8.79	517.3	[M+H]+	LysoPC 18:3	Lipids	17800000	18800000	19100000	27800000	34100000	31900000	26000000	18200000	22600000	67300000	49400000	46200000	2940000	1040000	1820000	2310000	2390000	2020000	2715400	2405400	2277200	-
146	pmd0136	524.4	184	9.91	523.36	[M+H]+	LysoPC 18:0	Lipids	24600000	31400000	32100000	133000000	109000000	121000000	92900000	41700000	75100000	176000000	129000000	148000000	7380000	6300000	7810000	14600000	20700000	23200000	736000	956890	618190	-
147	pmc0960	544.4	485.2	8.91	543.4	[M+H]+	LysoPC 20:4	Lipids	14200000	14500000	14800000	11900000	31100000	13700000	9450000	8850000	9190000	18200000	16500000	24700000	19000000	2050000	4690000	13200000	9870000	9760000	55831	42402	43367	-
148	pmb0608	549.1	301.4	4.55	548.1	[M+H]+	Chrysoeriol O-malonylhexoside	Flavone	1500000	1610000	1750000	907000	2320000	878000	699000	1230000	659000	1870000	1550000	822000	1730000	1930000	2820000	2680000	2650000	2640000	40112	38309	35970	-
149	pmb2922	565.1	323.1	1.11	566.1	[M-H]-	Uridine 5'-diphospho-D-glucose	Nucleotide and derivates	604000	556000	599000	24700	41500	14800	27700	28800	20600	65200	39100	55500	1390000	1480000	1370000	1450000	1730000	1620000	818570	887710	536520	C00029
150	pmb2936	591.1	367.2	4.95	592.1	[M-H]-	Disinapoyl hexoside	Phenylpropanoids	23900	23100	29200	20200	22200	15300	23700	67000	30400	33700	27200	18000	9	9	9	58400	28000	32200	11018	8310.9	6971.3	-
151	pme0369	593.2	285	3.83	594.16	[M-H]-	Kaempferol 3-O-rutinoside (Nicotiflorin)	Flavonol	1160000	1140000	974000	1160000	1410000	1510000	804000	895000	873000	1420000	1080000	1200000	969000	886000	1030000	1040000	1040000	849000	2295400	2191800	2260100	-
152	pme1773	595	287	2.7	595	Protonated	Cyanidin 3-O-rutinoside (Keracyanin)	Anthocyanins	332000	375000	409000	9	9	78900	9	9	9	9	120000	9	1690000	1320000	2630000	559000	394000	442000	11134	17104	9648.4	C08620
153	pmb0624	611.1	431.3	3.09	610.1	[M+H]+	6-C-hexosyl-luteolin O-hexoside	Flavone	4300000	4360000	3860000	3850000	3450000	1910000	12100000	8180000	12100000	1980000	1160000	4240000	424000	350000	724000	504000	658000	610000	20614	23536	16637	-
154	pmb0665	611.2	465.1	3.78	610.2	[M+H]+	Luteolin 8-C-hexosyl-O-hexoside	Flavone	18900000	18600000	17100000	16300000	21300000	19800000	12500000	14700000	14700000	26000000	19800000	23600000	20400000	23100000	21500000	22300000	16300000	18100000	16995000	16293000	17232000	-
155	pmb0530	664.2	136.2	1.16	663.2	[M+H]+	Nicotinic acid adenine dinucleotide	Nucleotide and derivates	41800	44200	39400	12900	13600	9780	30900	42200	50700	9	26800	12500	45700	72100	54900	60700	93100	53200	200380	184380	123080	C00003
156	pmf0616	697.1	535.1	3.03	697.1	Protonated	Malvidin 3-acetyl-5-diglucoside	Anthocyanins	2330000	2850000	2360000	1260000	2710000	1940000	3010000	5570000	1800000	3110000	3160000	1460000	9	9	9	3170000	2680000	2720000	28222	30098	28256	-
157	pmb0168	700.1	184.4	9.33	699.1	[M+H]+	PC 16:1/14:1	Lipids	324000	404000	405000	9	9	9	194000	9	115000	9	9	9	967000	1060000	853000	589000	1130000	933000	36241	34784	22200	-
158	pmb0672	771.1	463.1	4.02	770.1	[M+H]+	6-C-hexosyl-apigenin O-feruloylhexoside	Flavone	1200000	1470000	1370000	1410000	4060000	1070000	682000	1550000	470000	1550000	2410000	387000	634000	707000	1240000	1170000	1890000	1620000	5547000	3196700	2769000	-
159	pmb0592	771.1	463.2	3.92	770.1	[M+H]+	Chrysoeriol O-hexosyl-O-rutinoside	Flavone	1300000	1390000	1130000	1350000	4070000	1060000	573000	1480000	506000	1310000	2310000	480000	489000	592000	1120000	1130000	1430000	1330000	15144000	8568000	8935200	-
160	pme2292	89	72	0.64	88.1	[M+H]+	Putrescine	Phenolamides	36500	25800	16300	63100	122000	26700	247000	95000	40500	9520	22200	33500	11600	11100	9	24600	7560	8720	41052	57189	51269	C00134
161	pme2601	89	59	1.19	90.03	[M-H]-	3-Hydroxypropanoic acid	Organic acids and derivatives	149000	114000	153000	217000	164000	122000	438000	385000	309000	131000	106000	127000	116000	128000	114000	80400	92700	78300	46308	37640	28445	C01013
162	pma0104	369.1	207.1	3.82	368.12	[M+H]+	N-sinapoyl hydroxycoumarin	Phenylpropanoids	8550000	8280000	10200000	5940000	11400000	6500000	8060000	18600000	4160000	7370000	8840000	4570000	6350000	6290000	8500000	15500000	19800000	17100000	9	9	9	-
163	pma0214	479	317.1	3.91	478	[M+H]+	methylQuercetin O-hexoside	Flavonol	2230000	2080000	1890000	1670000	1260000	2690000	1440000	2490000	1210000	3780000	2740000	852000	2880000	3400000	3910000	2600000	2260000	2820000	9	9	9	-
164	pma0294	463.1	301	4.04	462.12	[M+H]+	Chrysoeriol 5-O-hexoside	Flavone	2020000	2050000	2260000	2070000	2670000	1760000	2670000	3120000	1990000	1830000	1850000	723000	1430000	1570000	2030000	1700000	1730000	1480000	9	9	9	-
165	pma0359	535.1	331.1	4.69	534.11	[M+H]+	Tricin 5-O-acetylglucoside	Flavone	58200	104000	69400	38400	80100	55500	97100	190000	73800	101000	62000	64200	87100	89200	132000	134000	97800	165000	9	9	9	-
166	pma0461	277.2	93.1	8.52	276.22	[M+H]+	14,15-Dehydrocrepenynic acid	Lipids	3030000	2560000	2780000	2350000	971000	2340000	9840000	9670000	11300000	571000	721000	859000	112000	87100	96400	75500	134000	99800	9	9	9	-
167	pma0633	349.3	204.3	2.68	348.26	[M+H]+	N-p-coumaroylspermine	Phenolamides	4130000	3820000	3920000	5870000	5820000	6410000	4280000	4800000	5640000	5680000	5320000	5360000	9	9	9	9	9	9	9	9	9	-
168	pma0680	484.2	220.1	3.56	483.24	[M+H]+	N', N''-Feruloyl,caffeoylspermidine	Phenolamides	360000	471000	449000	9	9	9	9	9	9	9	9	9	2230000	1540000	942000	9	9	9	9	9	9	-
169	pma0760	565	317	4.33	564	[M+H]+	Selgin O-malonylhexoside	Flavone	6520000	7330000	6670000	4730000	5920000	4720000	3590000	6840000	2140000	9490000	7030000	3740000	4920000	4220000	7090000	13200000	9960000	12200000	9	9	9	-
170	pma0791	521	273	4.5	520	[M+H]+	Naringenin O-malonylhexoside	Flavanone	876000	757000	806000	380000	2210000	834000	1080000	3170000	470000	877000	1300000	489000	443000	405000	352000	684000	461000	584000	9	9	9	-
171	pma0819	729.2	331	5.19	728.21	[M+H]+	Tricin O-glyceryl-hexosyl-O-hexoside	Flavone	10300	16900	9240	15500	12500	13200	13200	9050	12800	10400	14000	10800	18100	12100	13700	12400	22300	16900	9	9	9	-
172	pma0825	503	255	5.24	502	[M+H]+	Chrysin O-malonylhexoside	Flavone	1310000	1400000	1420000	1260000	868000	1670000	454000	764000	694000	1650000	1620000	1290000	1780000	1970000	2440000	1450000	1520000	1590000	9	9	9	-
173	pma1590	463.1	301	2.89	463.12	Protonated	Peonidin O-hexoside	Anthocyanins	1860000	2090000	1800000	1360000	2280000	975000	1850000	2200000	1820000	1520000	1560000	1520000	883000	780000	962000	2080000	2920000	3080000	9	9	9	-
174	pma1751	286	124	1.95	285	[M+H]+	Nicotinic acid-hexoside	Vitamins and derivatives	936000	1180000	1170000	1060000	1670000	1850000	1790000	2560000	1270000	998000	1030000	1360000	1490000	866000	935000	999000	812000	1060000	9	9	9	-
175	pma2405	280	177	2.87	280	Protonated	Feruloylcholine	Alkaloids	5220000	6120000	5490000	400000	2810000	2760000	413000	1550000	313000	879000	330000	336000	21000000	16400000	49500000	800000	651000	802000	9	9	9	-
176	pma2681	206.1	178	2.05	205.1	[M+H]+	Xanthurenic acid	Organic acids and derivatives	433000	551000	508000	286000	694000	389000	559000	697000	756000	802000	516000	472000	210000	212000	473000	671000	766000	659000	9	9	9	C02470
177	pma3443	535.3	331.1	5.78	534.3	[M+H]+	Tricin 7-O-acetylglucoside	Flavone	335000	300000	345000	9	176000	69200	43600	121000	42900	185000	121000	95200	571000	817000	801000	389000	584000	423000	9	9	9	-
178	pma3499	375	357	6.89	374	[M+H]+	Digitoxigenine	Others	763000	831000	778000	9	924000	844000	1230000	1640000	812000	1330000	2120000	9	9	9	9	9	9	9	9	9	9	-
179	pma6199	417.2	255.1	4.99	416.2	[M+H]+	Chrysin O-hexoside	Flavone	623000	584000	528000	1400000	354000	1080000	1330000	1270000	1210000	483000	527000	452000	246000	334000	527000	124000	162000	188000	9	9	9	-
180	pma6262	349.2	204.3	2.42	348.2	[M+H]+	N'-p-coumaroylspermine	Phenolamides	3610000	4090000	4020000	5880000	5650000	6010000	3810000	4800000	5890000	5590000	4940000	5510000	9	9	9	9	9	9	9	9	9	-
181	pma6353	417.2	297.1	4	416.2	[M+H]+	Chrysin C-hexoside	Flavone	90300	98600	117000	9	9	9	9	104000	9	137000	155000	9	184000	150000	144000	214000	174000	174000	9	9	9	-
182	pma6373	671.1	347	4.06	670.1	[M+H]+	3',4',5'-Dihydrotricetin O-hexosyl-O-hexoside	Flavone	215000	256000	170000	438000	112000	351000	260000	386000	123000	129000	154000	90200	56200	66400	193000	9	130000	79100	9	9	9	-
183	pma6455	229	97	0.86	230.02	[M-H]-	Ribulose-5-phosphate	Carbohydrates	47100	44500	33000	14800	23600	19100	28500	12000	22300	19800	23100	6930	47500	33300	47800	62900	110000	59700	9	9	9	C00117
184	pma6516	757.3	595.2	3.55	756.3	[M+H]+	C-hexosyl-apigenin O-hexosyl-O-hexoside	Flavone	884000	1020000	896000	676000	901000	911000	304000	491000	291000	1680000	1180000	443000	839000	723000	1330000	695000	1020000	586000	9	9	9	-
185	pma6558	313.1	298.1	7.22	314.08	[M-H]-	Velutin	Flavone	62400	64700	57900	46000	51200	31600	29400	46700	9950	30300	47200	16100	76300	103000	159000	63000	77500	61100	9	9	9	-
186	pma6586	567.3	405.2	4.04	566.3	[M+H]+	Tricin O-glycerylhexoside	Flavone	944000	833000	892000	863000	907000	845000	795000	717000	901000	692000	787000	832000	774000	799000	893000	753000	774000	908000	9	9	9	-
187	pma6599	207.1	85	3.31	206.1	[M+H]+	6-Hydroxymethylherniarin	Phenylpropanoids	1460000	1350000	1480000	1430000	1060000	1370000	1510000	1400000	1590000	1110000	858000	1220000	1400000	1580000	1610000	1520000	1400000	1620000	9	9	9	-
188	pma6639	479.2	317.2	4.17	478.2	[M+H]+	Isorhamnetin O-hexoside	Flavonol	2720000	2300000	2790000	2110000	3040000	2550000	1980000	3560000	1650000	3240000	2920000	1030000	3160000	3510000	3770000	4080000	2390000	2140000	9	9	9	-
189	pmb0064	374.1	198.2	2.05	373.1	[M+H]+	DIMBOA glucoside	Others	829000	1090000	1070000	447000	999000	920000	1090000	1820000	1040000	852000	524000	858000	1330000	1380000	2070000	715000	1040000	1000000	9	9	9	C04831
190	pmb0159	696.4	355.2	7.6	695.4	[M+H]+	DGMG (18:2) isomer2	Lipids	44600	50400	40000	19100	113000	17700	23200	30900	20000	36900	9	37900	191000	61100	86400	43600	48300	55900	9	9	9	-
191	pmb0160	353.3	261.1	7.6	352.3	[M+H]+	MAG (18:3) isomer5	Lipids	8830000	8820000	8610000	7220000	12000000	8150000	17500000	19300000	17500000	10900000	7290000	11300000	9	9	9	9	9	9	9	9	9	-
192	pmb0161	696.4	355.3	8.12	695.4	[M+H]+	DGMG (18:2) isomer1	Lipids	60500	91600	50800	35100	48400	29500	122000	127000	116000	64400	54000	48700	9	9	9	9	9	9	9	9	9	-
193	pmb0163	696.4	355.4	8.11	695.4	[M+H]+	DGMG (18:2) isomer3	Lipids	71500	58100	48600	24100	95500	32100	127000	107000	139000	54400	69500	62100	9	9	9	9	128000	9	9	9	9	-
194	pmb0164	355.1	147.2	8.46	354.1	[M+H]+	MAG (18:2) isomer1	Lipids	109000	93000	108000	54600	120000	9	349000	270000	297000	51600	9	147000	9	9	9	9	9	9	9	9	9	-
195	pmb0165	494.3	184.1	8.55	493.3	[M+H]+	LysoPC 16:1	Lipids	2410000	2980000	2830000	3520000	6410000	4630000	1630000	1210000	1320000	5790000	4280000	2870000	1630000	952000	931000	997000	1050000	1380000	9	9	9	-
196	pmb0242	310	251	3.08	310	Protonated	Sinapoylcholine	Alkaloids	144000	164000	152000	143000	103000	95300	312000	338000	327000	70600	111000	182000	9	9	9	9	9	9	9	9	9	C00933
197	pmb0292	387.1	331.1	7.65	386.1	[M+H]+	Cholesterol	Lipids	958000	1000000	996000	663000	1010000	1730000	461000	1100000	1200000	637000	511000	722000	1160000	2070000	916000	1160000	1080000	863000	9	9	9	C00187
198	pmb0323	251.1	163.2	1.97	250.1	[M+H]+	N-Caffeoyl putrescine	Phenolamides	7920000	8040000	8020000	9	23700000	1080000	9	9	9	9	9	9	5570000	3910000	4350000	57500000	14200000	21400000	9	9	9	C03002
199	pmb0475	671.2	509	2.85	670.2	[M+H]+	Gallic acid O-feruloyl-O-hexosyl-O-hexoside	Phenylpropanoids	1240000	1770000	1700000	2170000	1100000	2180000	3980000	2090000	4940000	1370000	1350000	2070000	260000	9	266000	359000	556000	587000	9	9	9	-
200	pmb0488	146.2	72.2	0.56	145.2	[M+H]+	Spermidine	Phenolamides	20500	32700	27700	36800	32200	29800	34900	35300	38300	34100	34100	31300	24900	28300	15700	30300	25400	37200	9	9	9	C00315
201	pmb0489	397.1	147.3	1.73	396.1	[M+H]+	N-hexosyl-p-coumaroyl putrescine	Phenolamides	179000	177000	214000	9	9	9	9	9	9	9	345000	9	607000	623000	860000	9	9	9	9	9	9	-
202	pmb0492	584.2	325	2.42	583.2	[M+H]+	N',N",N"'-p-coumaroyl-cinnamoyl-caffeoyl spermidine	Phenolamides	1590000	1810000	1830000	2140000	3640000	2310000	825000	1150000	1100000	2380000	2260000	2180000	710000	712000	1030000	951000	1380000	1210000	9	9	9	-
203	pmb0500	411.1	177.5	4.75	410.1	[M+H]+	N',N"-p-coumaroyl-feruloyl putrescine	Phenolamides	55100	34800	67000	18100	21500	39300	108000	154000	38700	36500	34700	53800	152000	40700	57700	20300	30600	45000	9	9	9	-
204	pmb0501	131.1	114.1	0.75	130.1	[M+H]+	Agmatine	Phenolamides	15000	29700	23700	32800	34900	22000	27700	22000	42600	37200	24300	38300	20600	20100	9	12300	25600	30700	9	9	9	C00179
205	pmb0505	235.1	147.2	2.38	234.1	[M+H]+	N'-p-Coumaroyl putrescine	Phenolamides	1670000	1870000	2100000	9	739000	9	9	9	9	9	9	9	7700000	12300000	7850000	1710000	716000	1240000	9	9	9	-
206	pmb0532	349.1	137.3	1.16	348.1	[M+H]+	Inosine 5'-monophosphate	Nucleotide and derivates	121000	104000	102000	20200	33700	19500	125000	170000	111000	46200	81600	61600	191000	261000	478000	46600	130000	73300	9	9	9	C00130
207	pmb0542	535.1	287.5	2.99	535.1	Protonated	Cyanidin 3-O-malonylhexoside	Anthocyanins	216000	181000	195000	9	9	9	9	9	9	9	9	9	372000	449000	1320000	9	9	9	9	9	9	-
208	pmb0545	477.1	315	3.32	477.1	Protonated	Rosinidin O-hexoside	Anthocyanins	2700000	3870000	2500000	4680000	3480000	4090000	8240000	8430000	5750000	3840000	5800000	1470000	9	9	9	9	9	9	9	9	9	-
209	pmb0550	449.1	287.3	2.59	449.1	Protonated	Cyanidin 3-O-glucoside (Kuromanin)	Anthocyanins	1580000	1540000	1350000	9	1800000	9	9	9	9	552000	9	9	3010000	3100000	7620000	686000	1450000	1720000	9	9	9	C08604
210	pmb0565	509.1	347.2	3.41	508.1	[M+H]+	Syringetin 3-O-hexoside	Flavonol	650000	579000	567000	734000	697000	511000	1000000	1020000	675000	379000	344000	248000	232000	188000	276000	483000	492000	508000	9	9	9	-
211	pmb0595	479.2	317.2	4.17	478.2	[M+H]+	Isorhamnetin 5-O-hexoside	Flavonol	3540000	3230000	2440000	2650000	3310000	3110000	2430000	3610000	1220000	3110000	3630000	1010000	3250000	3480000	3370000	3350000	2500000	3060000	9	9	9	-
212	pmb0603	625.1	301.6	4.17	624.1	[M+H]+	Chrysoeriol O-hexosyl-O-hexoside	Flavone	64500	91400	93600	37100	9	42700	68600	39800	42000	68100	49300	43300	65200	172000	135000	141000	202000	104000	9	9	9	-
213	pmb0605	433.1	271.1	4.21	432.1	[M+H]+	Apigenin 7-O-glucoside (Cosmosiin)	Flavone	285000	428000	392000	524000	302000	504000	237000	9	327000	536000	538000	378000	279000	260000	491000	9	341000	222000	9	9	9	C04608
214	pmb0607	463.2	301.1	4.3	462.2	[M+H]+	Chrysoeriol 7-O-hexoside	Flavone	2020000	2290000	2310000	2140000	2880000	1970000	2800000	3520000	2080000	2340000	2270000	763000	1580000	1760000	2300000	1850000	1860000	1600000	9	9	9	-
215	pmb0618	627.1	465.1	2.78	626.1	[M+H]+	8-C-hexosyl-hesperetin O-hexoside	Flavone	4310000	4610000	3670000	4070000	5100000	3790000	5920000	5870000	6320000	6240000	6370000	2650000	5080000	1990000	6730000	2480000	2390000	2990000	9	9	9	-
216	pmb0619	775.1	612.9	2.67	774.1	[M+H]+	Eriodictiol 6-C-hexoside 8-C-hexoside-O-hexoside	Flavone	416000	444000	521000	587000	497000	485000	606000	831000	753000	585000	766000	375000	546000	435000	643000	375000	443000	407000	9	9	9	-
217	pmb0639	757.2	595.2	3.13	756.2	[M+H]+	8-C-hexosyl-apigenin O-hexosyl-O-hexoside	Flavone	274000	325000	294000	9	9	9	9	9	9	342000	9	305000	350000	332000	613000	449000	388000	469000	9	9	9	-
218	pmb0657	739.1	431.3	3.74	738.1	[M+H]+	C-rhamnosyl-acacetin O-p-coumaroylhexoside	Flavone	2100000	2380000	2430000	557000	2470000	1110000	626000	774000	642000	858000	476000	273000	180000	337000	347000	725000	706000	888000	9	9	9	-
219	pmb0661	609.1	463.3	3.87	608.1	[M+H]+	Chrysoeriol C-hexosyl-O-rhamnoside	Flavone	1620000	2100000	2520000	1650000	4600000	1140000	572000	1340000	453000	1810000	2750000	732000	734000	799000	1450000	1570000	1970000	1820000	9	9	9	-
220	pmb0662	787.2	463.1	3.64	786.2	[M+H]+	C-hexosyl-luteolin O-feruloylhexoside	Flavone	93400	266000	167000	349000	744000	194000	9	9	89800	233000	275000	161000	74400	53900	103000	90100	9	90100	9	9	9	-
221	pmb0695	771.1	606.8	3.44	770.1	[M+H]+	C-hexosyl-chrysoeriol O-rutinoside	Flavone	407000	465000	508000	553000	1480000	459000	176000	263000	146000	647000	757000	169000	9	9	9	498000	705000	636000	9	9	9	-
222	pmb0696	625	463	3.46	624	[M+H]+	8-C-hexosyl chrysoeriol O-hexoside	Flavone	9100000	9610000	9700000	9370000	23200000	10400000	1930000	4390000	1930000	13000000	16900000	4890000	9	9	9	8590000	15600000	11200000	9	9	9	-
223	pmb0706	713.1	465.1	2.96	712.1	[M+H]+	Quercetin 5-O-malonylhexosyl-hexoside	Flavonol	606000	570000	601000	353000	422000	491000	240000	364000	259000	1090000	626000	232000	698000	445000	1210000	968000	835000	604000	9	9	9	-
224	pmb0711	611.2	303.1	3.7	610.2	[M+H]+	Quercetin 7-O-rutinoside	Flavonol	6000000	5280000	4150000	4420000	4900000	5020000	3810000	4210000	3480000	5320000	5780000	4160000	5030000	5130000	6560000	4730000	4090000	5150000	9	9	9	-
225	pmb0712	655.2	331.1	3.5	654.2	[M+H]+	Tricin 5-O-hexosyl-O-hexoside	Flavone	158000	96100	128000	138000	105000	74800	241000	206000	153000	90400	88200	109000	83100	129000	111000	47000	75900	74200	9	9	9	-
226	pmb0713	655.2	331.2	3.37	654.2	[M+H]+	Tricin 7-O-hexosyl-O-hexoside	Flavone	162000	186000	149000	158000	166000	116000	329000	424000	148000	148000	191000	118000	101000	127000	9	116000	140000	203000	9	9	9	-
227	pmb0725	669.1	331.4	5.1	668.1	[M+H]+	Tricin 7-O-feruloylhexoside	Flavone	243000	258000	232000	53600	311000	64000	9	152000	9	159000	187000	9	176000	287000	327000	279000	408000	324000	9	9	9	-
228	pmb0736	493.1	331	4.3	492.1	[M+H]+	Tricin 7-O-hexoside	Flavone	687000	627000	567000	9	9	9	9	9	9	531000	429000	9	1260000	1410000	1390000	1320000	1500000	1070000	9	9	9	-
229	pmb0739	659.3	331	4.92	658.3	[M+H]+	Tricin O-hexosyl-O-syringin alcohol	Flavone	144000	117000	168000	9	9	119000	9	9	9	149000	98600	9	248000	9	155000	148000	82900	148000	9	9	9	-
230	pmb0746	527.1	331	5.84	526.1	[M+H]+	Tricin 4'-O-β-guaiacylglycerol	Flavone	247000	211000	225000	108000	98900	80500	105000	154000	122000	264000	126000	395000	238000	187000	391000	414000	337000	388000	9	9	9	-
231	pmb0758	491.1	329	3.09	490.1	[M+H]+	Anisic acid O-feruloyl hexoside	Organic acids and derivatives	2920000	3080000	2770000	3980000	9	3530000	5480000	3800000	7990000	2320000	9	2200000	403000	264000	525000	334000	550000	316000	9	9	9	-
232	pmb0767	302.4	60.2	7.25	301.4	[M+H]+	D-erythro-Dihydrosphingosine	Alcohols	10600	20600	16500	23300	24000	27500	32400	26700	27800	27300	28800	31000	13900	22100	14800	17600	25900	18800	9	9	9	-
233	pmb0769	485.1	323.1	3.79	484.1	[M+H]+	N-hexosyl-p-coumaroyl serotonin	Alkaloids	1270000	1340000	1030000	449000	9	547000	357000	464000	9	927000	1070000	367000	3180000	2590000	967000	3080000	1670000	1580000	9	9	9	-
234	pmb0771	314	177	4.91	313	[M+H]+	N-Feruloyl tyramine	Phenolamides	87000	80400	78900	205000	235000	213000	106000	99400	193000	91400	84300	298000	9	9	9	9	9	9	9	9	9	C02717
235	pmb0772	307.1	131.4	5.94	306.1	[M+H]+	N-Cinnamoyl serotonin	Alkaloids	73200	98100	60100	9	55700	129000	92800	87300	38200	163000	221000	9	61700	9	9	54200	9	28100	9	9	9	-
236	pmb0789	332.1	314.3	1.16	331.1	[M+H]+	Pyridoxine O-glucoside	Vitamins and derivatives	9730000	8870000	9290000	12700000	6480000	12500000	5160000	5910000	8270000	13300000	8010000	10600000	11300000	11000000	16700000	12600000	11200000	13300000	9	9	9	-
237	pmb0802	220.2	202.1	2.15	219.2	[M+H]+	D-Pantothenic acid	Vitamins and derivatives	3110000	3780000	3610000	1960000	3330000	2510000	1410000	1840000	1900000	2930000	2220000	3550000	5570000	6610000	7960000	5000000	4540000	5980000	9	9	9	C00864
238	pmb0808	353.1	179	2.83	352.1	[M+H]+	6,7-dihydroxycoumarin 6-O-quinic acid	Phenylpropanoids	3580000	5600000	6240000	4870000	5030000	5930000	4190000	4070000	4980000	7100000	5520000	7460000	2290000	2740000	3260000	8440000	6890000	7230000	9	9	9	-
239	pmb0835	611.2	287.1	2.36	610.2	[M+H]+	Gallocatechin-gallocatechin	Polyphenol	137000	154000	165000	267000	137000	257000	154000	184000	152000	307000	76600	146000	80900	61800	84400	171000	148000	171000	9	9	9	-
240	pmb0837	577.1	425.3	2.92	576.1	[M+H]+	Procyanidin A3	Proanthocyanidins	43000	53500	60700	31300	43200	20300	9	9	26200	9	20700	23700	71900	85600	114000	75100	69700	83700	9	9	9	-
241	pmb0848	494.3	184.2	7.88	493.3	[M+H]+	LysoPC 16:1 (2n isomer)	Lipids	7240000	8210000	8040000	4930000	12100000	6010000	4080000	4270000	3390000	13400000	12300000	10200000	25700000	6200000	6630000	11000000	12900000	12000000	9	9	9	-
242	pmb0852	520.3	502.2	8.43	519.3	[M+H]+	LysoPC 18:2	Lipids	37300000	42600000	41300000	19900000	39000000	21900000	10800000	12700000	12600000	42300000	39800000	26700000	114000000	31000000	36100000	61200000	75900000	70400000	9	9	9	-
243	pmb0859	522.4	184	8.91	521.4	[M+H]+	LysoPC 18:1 (2n isomer)	Lipids	1580000	1860000	1780000	1630000	4220000	1860000	1630000	1510000	1250000	2640000	2370000	3020000	1930000	266000	625000	1400000	1120000	1170000	9	9	9	-
244	pmb0866	468.1	184.4	7.74	467.1	[M+H]+	LysoPC 14:0	Lipids	2070000	2240000	2240000	2690000	3900000	2270000	1870000	1830000	1690000	4740000	4100000	4100000	534000	150000	226000	322000	359000	351000	9	9	9	-
245	pmb0873	520	184.5	8.25	519	[M+H]+	LysoPC 18:2 (2n isomer)	Lipids	15700000	18300000	18200000	6740000	15500000	7290000	3800000	4550000	3170000	16100000	14600000	11500000	65800000	14000000	16700000	30600000	40700000	36100000	9	9	9	-
246	pmb0880	482.1	313.8	8.98	481.1	[M+H]+	LysoPE 18:0 (2n isomer)	Lipids	12900	12300	17800	40300	17700	59800	34500	9840	34100	79500	54400	59200	9	9	9	9	9	9	9	9	9	-
247	pmb0882	522.1	504.2	9.07	521.1	[M+H]+	LysoPC 18:1	Lipids	18200000	21000000	21700000	18400000	47000000	20700000	15200000	15000000	13100000	29600000	28000000	31400000	24600000	2720000	7380000	16200000	12200000	12600000	9	9	9	-
248	pmb1178	339.1	145.4	3.32	338.1	[M+H]+	O-Feruloyl 2-hydroxylcoumarin	Phenylpropanoids	587000	518000	550000	577000	415000	697000	905000	1040000	1030000	479000	235000	759000	9	9	9	9	9	9	9	9	9	-
249	pmb1240	503.2	311.1	3.79	502.2	[M+H]+	Phellodensin F	Others	1430000	1130000	1050000	1020000	709000	1110000	983000	1330000	1060000	1120000	1290000	839000	1170000	964000	805000	1620000	692000	877000	9	9	9	-
250	pmb1318	457.2	209.2	4.48	456.2	[M+H]+	8-Methyl-2-oxo-4-phenyl-2H-chromen-7-yl 4-(hexyloxy)benzoate	Organic acids and derivatives	1210000	1010000	943000	426000	1390000	802000	267000	520000	432000	1080000	854000	1060000	1610000	1470000	1890000	1720000	1580000	1570000	9	9	9	-
251	pmb1490	305.1	131.3	6.58	304.1	[M+H]+	Oryzalexin E	Terpene	1240000	1190000	1170000	9	536000	520000	585000	710000	356000	1560000	1830000	539000	1580000	1590000	1670000	1630000	1540000	1860000	9	9	9	C21561
252	pmb1530	317.1	137.1	7.34	316.1	[M+H]+	Phytocassane D	Terpene	494000	514000	354000	519000	414000	901000	472000	879000	325000	540000	584000	323000	425000	381000	332000	169000	210000	253000	9	9	9	-
253	pmb1574	277.2	93	8.21	276.2	[M+H]+	Octadecadien-6-ynoic acid	Lipids	121000	108000	130000	128000	69000	167000	488000	438000	599000	53300	66100	53800	9	9	9	9	9	9	9	9	9	-
254	pmb1587	207.2	165.2	8.41	206.2	[M+H]+	4-Hydroxy-3,5-diisopropylbenzaldehyde	Organic acids and derivatives	149000	212000	259000	99600	133000	85700	9	9	9	105000	178000	96300	9	57200	9	9	64500	55500	9	9	9	-
255	pmb1605	353.3	261.4	8.45	352.3	[M+H]+	MAG (18:3) isomer3	Lipids	14300000	13400000	12500000	4410000	9160000	2700000	12200000	15800000	14300000	4740000	4440000	6350000	76300000	22600000	22300000	22900000	23900000	22700000	9	9	9	-
256	pmb1656	353.1	335.1	9.9	352.1	[M+H]+	MAG (18:3) isomer4	Lipids	908000	731000	772000	571000	644000	557000	253000	240000	528000	594000	386000	1090000	1970000	1470000	1250000	917000	850000	818000	9	9	9	-
257	pmb1754	184	125	0.78	183	[M+H]+	O-Phosphocholine	Alkaloids	6230000	4950000	4910000	1690000	1750000	1530000	1550000	1680000	1470000	2270000	2100000	2120000	14900000	11800000	16600000	10900000	7350000	9690000	9	9	9	C00588
258	pmb1912	474.2	327	2.3	473.2	[M+H]+	10-Formyl-THF	Organic acids and derivatives	13900000	14600000	15100000	13600000	18100000	11500000	14200000	19800000	13700000	13400000	12600000	7400000	11600000	10400000	13700000	17200000	17700000	19600000	9	9	9	C00234
259	pmb2211	343.1	240.7	6.59	342.1	[M+H]+	Cocamidopropyl betaine	Alkaloids	1370000	1310000	1340000	1920000	3030000	1360000	1090000	924000	833000	1400000	1090000	1390000	1300000	1100000	1430000	1210000	1150000	1100000	9	9	9	-
260	pmb2221	318.3	60.1	6.95	317.3	[M+H]+	4-Hydroxysphinganine	Lipids	243000	341000	367000	340000	363000	265000	21400	31000	41800	636000	784000	333000	334000	282000	302000	457000	448000	533000	9	9	9	C12144
261	pmb2222	319.1	283.7	7.07	318.1	[M+H]+	Phytocassane C	Terpene	4320000	4450000	4590000	14000000	4200000	5280000	8440000	10400000	6520000	3020000	2790000	3480000	1590000	1740000	1490000	1550000	1690000	1780000	9	9	9	-
262	pmb2325	353.1	261.8	8.42	352.1	[M+H]+	MAG (18:3) isomer2	Lipids	1180000	1160000	995000	391000	805000	234000	1480000	2030000	1730000	336000	337000	557000	6660000	1950000	2000000	2040000	2070000	1960000	9	9	9	-
263	pmb2369	772.1	496.2	8.79	771.1	[M+H]+	PC 19:2/16:0	Lipids	26800	18400	19100	43700	39500	60200	32100	14300	34600	85200	82000	70400	9	9	9	9	9	9	9	9	9	-
264	pmb2388	524.1	184	8.91	523.1	[M+H]+	LysoPC 18:0 (2n isomer)	Lipids	3680000	4310000	4380000	3980000	9650000	4280000	3320000	3290000	2680000	6520000	5980000	6630000	4840000	569000	1550000	3310000	2510000	2640000	9	9	9	-
265	pmb2467	279.2	95.1	10.62	278.2	[M+H]+	α-Linolenic acid	Lipids	12300000	10200000	10500000	13100000	13500000	13700000	11800000	8920000	12800000	11700000	13400000	12300000	1790000	867000	1230000	729000	709000	796000	9	9	9	C06427
266	pmb2554	529.1	193.1	2.16	530.1	[M-H]-	5-O-Feruloyl quinic acid glucoside	Organic acids and derivatives	64700	60000	63200	74000	61700	73500	112000	165000	83200	65500	62000	67000	31600	34600	46900	57400	57200	54200	9	9	9	-
267	pmb2561	190.1	84	2.37	191.1	[M-H]-	N-Acetylmethionine	Amino acid and derivatives	93100	110000	79300	9	9	9	9	9	9	9	9	9	296000	466000	324000	163000	186000	207000	9	9	9	C02712
268	pmb2601	307.1	161.1	4.38	308.1	[M-H]-	7-hydroxycoumarin-beta-rhamnoside	Phenylpropanoids	235000	209000	227000	534000	768000	1230000	175000	140000	245000	160000	179000	151000	9	9	9	9	9	9	9	9	9	-
269	pmb2640	199	181	9.66	200	[M-H]-	Lauric acid (C12:0)	Lipids	50200	46500	46300	20700	25800	25000	27600	30300	27800	21700	28700	31500	79400	98800	115000	78300	85200	89300	9	9	9	C02679
270	pmb2643	225	207	10.05	226	[M-H]-	Myristoleic acid (C14:1)	Lipids	34000	31100	29900	15800	16200	13700	20100	20600	27500	12900	17200	15800	34800	46100	26600	54100	84600	55600	9	9	9	C08322
271	pmb2648	263.1	146.9	0.74	264.1	[M-H]-	Thiamine	Vitamins and derivatives	72300	48700	45000	39400	64300	47900	150000	123000	85800	28700	41600	49300	32900	16400	23500	24900	28600	30500	9	9	9	C00378
272	pmb2653	649.1	145	0.76	650.1	[M-H]-	D(+)-Melezitose O-rhamnoside	Carbohydrates	271000	267000	284000	461000	516000	587000	132000	129000	148000	490000	519000	476000	15900	31300	55000	28400	38700	33300	9	9	9	-
273	pmb2654	460.1	117.9	0.78	461.1	[M-H]-	Anthranilate O-hexosyl-O-hexoside	Organic acids and derivatives	758000	712000	711000	1070000	414000	794000	199000	136000	226000	714000	609000	1080000	875000	788000	537000	733000	610000	427000	9	9	9	-
274	pmb2787	293.2	275.1	9.19	294.2	[M-H]-	9-KODE	Lipids	1120000	1070000	1110000	1950000	1610000	2350000	716000	499000	797000	1720000	1710000	1300000	55400	37300	27700	38300	46000	51400	9	9	9	-
275	pmb2799	295	195.2	9.74	296	[M-H]-	12,13-EODE	Lipids	422000	407000	343000	325000	437000	576000	522000	370000	477000	406000	508000	356000	28100	19400	20800	22500	24400	29700	9	9	9	-
276	pmb2831	315.1	153.1	2.44	316.1	[M-H]-	Protocatechuic acid O-glucoside	Polyphenol	1940000	1860000	2040000	2220000	2070000	1930000	1870000	1860000	1860000	1670000	1640000	1470000	2030000	2260000	2550000	1940000	2100000	2170000	9	9	9	-
277	pmb2835	181.1	166	3.95	182.1	[M-H]-	Syringaldehyde	Phenylpropanoids	143000	137000	139000	62500	93100	90700	114000	170000	102000	96800	132000	104000	283000	320000	264000	9	9	9	9	9	9	-
278	pmb2850	329	314	5.73	330	[M-H]-	Tricin	Flavone	32300	31400	31800	34900	87800	24700	66300	53700	80100	18400	13800	36600	22900	27100	9540	3940	4600	13500	9	9	9	-
279	pmb2858	665.1	161	0.81	666.1	[M-H]-	Maltotetraose	Carbohydrates	58600	43700	59000	110000	53900	78800	98500	78200	69400	90600	53800	105000	9	7060	7830	15000	22000	12600	9	9	9	C02052
280	pmb2867	350.1	144.1	1.72	351.1	[M-H]-	Kynurenic acid O-hexside	Organic acids and derivatives	592000	602000	547000	397000	852000	479000	808000	1220000	672000	678000	609000	398000	199000	267000	384000	441000	536000	480000	9	9	9	-
281	pmb2893	291.2	119.2	2.46	292.2	[M-H]-	N-p-Coumaroyl hydroxyagmatine	Phenolamides	46800	54900	50800	31800	68900	28600	9	17400	17400	46700	51600	39100	75500	152000	143000	63500	67300	82700	9	9	9	-
282	pmb2928	331	313.1	2.02	332	[M-H]-	Gallic acid O-Hexoside	Organic acids and derivatives	11400000	11500000	11600000	12600000	21500000	14100000	7140000	12200000	7120000	12700000	9520000	11600000	3590000	4090000	5390000	11600000	15000000	16200000	9	9	9	-
283	pmb2938	353.1	100.9	3	354.1	[M-H]-	4-O-Caffeoyl quinic acid (criptochlorogenic acid)	Organic acids and derivatives	984000	931000	1000000	885000	763000	899000	887000	828000	1010000	984000	902000	929000	1270000	1160000	1450000	861000	822000	745000	9	9	9	-
284	pmb2948	346.1	210.9	0.85	347.1	[M-H]-	Adenosine 3'-monophosphate	Nucleotide and derivates	1130000	1250000	1270000	1480000	2770000	475000	5830000	5850000	2570000	906000	1720000	452000	9	9	9	9	9	9	9	9	9	C01367
285	pmb2954	771.1	609.3	2.83	772.1	[M-H]-	Luteolin O-hexosyl-O-hexosyl-O-hexoside	Flavone	5300000	4960000	4520000	4300000	4160000	4990000	4650000	4700000	5880000	5150000	6320000	3020000	5670000	4370000	5420000	3540000	3140000	3040000	9	9	9	-
286	pmb2959	489.1	284.1	2.94	490.1	[M-H]-	Cyanidin O-acetylhexoside	Anthocyanins	130000	123000	136000	74800	186000	133000	59000	92300	47300	137000	76400	84300	84000	60700	136000	242000	264000	288000	9	9	9	-
287	pmb2970	625.2	565.3	2.19	626.2	[M-H]-	Hesperetin O-hexosyl-O-hexoside	Flavanone	74800	77000	93700	38500	139000	55500	52200	42700	37100	92600	102000	99400	95500	138000	157000	151000	153000	142000	9	9	9	-
288	pmb2978	563.1	269.1	4.04	564.1	[M-H]-	Apigenin O-hexosyl-O-pentoside	Flavone	602000	678000	666000	39300	81100	111000	9	9	9	210000	117000	46400	1100000	757000	2080000	773000	1170000	803000	9	9	9	-
289	pmb2984	491.1	287.1	5.09	492.1	[M-H]-	Acetyl-eriodictyol O-hexoside	Flavone	102000	89500	86300	9	157000	58900	9	9	9	61000	65400	57700	115000	132000	205000	239000	251000	217000	9	9	9	-
290	pmb2987	487.1	163	2.63	488.1	[M-H]-	Acacetin O-acetyl hexoside	Flavone	732000	694000	613000	560000	754000	679000	567000	828000	554000	645000	632000	367000	1160000	1270000	1230000	457000	485000	512000	9	9	9	-
291	pmb2988	624.1	286.2	3.15	625.1	[M-H]-	Luteolin O-hexosyl-O-gluconic acid	Flavone	49900	55600	47200	138000	112000	100000	107000	44400	137000	99500	99200	73700	9	9	9	9	9	9	9	9	9	-
292	pmb3000	503.1	341.1	3.94	504.1	[M-H]-	Chrysoeriol O-acetylhexoside	Flavone	97900	73600	77300	9	9	9	9	9	9	9	9	53300	213000	175000	116000	272000	262000	237000	9	9	9	-
293	pmb3002	607.1	299	3.98	608.1	[M-H]-	Chrysoeriol 7-O-rutinoside	Flavone	12700000	29600000	39200000	34700000	43700000	43700000	16800000	19900000	19500000	38900000	43200000	43800000	26800000	29400000	28800000	32400000	29700000	37400000	9	9	9	-
294	pmb3013	519.1	314.2	4.32	520.1	[M-H]-	Isorhamnetin O-acetyl-hexoside	Flavonol	994000	1130000	1090000	438000	1550000	644000	490000	1430000	254000	1100000	887000	281000	814000	654000	1480000	2240000	2580000	2130000	9	9	9	-
295	pmb3023	449.1	287	3.37	450.1	[M-H]-	Eriodictyol C-hexoside	Flavone	1770000	1930000	1660000	1170000	1430000	2050000	836000	1250000	707000	2260000	2340000	1340000	2210000	2100000	2590000	1820000	1580000	1590000	9	9	9	-
296	pmb3026	505.1	301.2	3.8	506.1	[M-H]-	Quercetin O-acetylhexoside	Flavonol	11800000	11800000	10400000	5440000	13200000	9320000	3710000	7460000	3260000	18300000	9780000	5910000	14200000	9950000	23900000	14400000	14500000	12700000	9	9	9	-
297	pmb3028	535	491.3	3.75	536	[M-H]-	Tricin O-sinapic acid	Flavone	421000	360000	446000	211000	9	188000	131000	9	168000	172000	233000	306000	331000	366000	327000	244000	282000	302000	9	9	9	-
298	pmb3037	571.1	329.1	5.71	572.1	[M-H]-	Tricin O-malonyl shikimic acid	Flavone	26200	32000	33700	11300	24200	8830	9	9	9	21100	39800	9	38200	44200	56300	55100	80300	61200	9	9	9	-
299	pmb3041	521.1	329.2	3.81	522.1	[M-H]-	Tricin O-saccharic acid	Flavone	293000	308000	370000	195000	278000	247000	244000	246000	238000	385000	229000	359000	442000	361000	291000	327000	283000	217000	9	9	9	-
300	pmb3042	491.1	329.1	4	492.1	[M-H]-	Tricin 5-O-hexoside	Flavone	3680000	2980000	3450000	2930000	3370000	2450000	1670000	2170000	1290000	3810000	3110000	3710000	3660000	2890000	4220000	5120000	4680000	5100000	9	9	9	-
301	pmb3056	355.1	121.1	1.89	356.1	[M-H]-	Homovanilloyl quinic acid	Organic acids and derivatives	892000	856000	924000	840000	719000	785000	680000	962000	721000	663000	625000	559000	1060000	1410000	1720000	1130000	1240000	1140000	9	9	9	-
302	pmb3058	369	191	2.16	370	[M-H]-	Quinic acid O-glucuronic acid	Organic acids and derivatives	8000000	12700000	14000000	13900000	17800000	14200000	13500000	14900000	13900000	14500000	11200000	16700000	1900000	1370000	4050000	17300000	15500000	15300000	9	9	9	-
303	pmb3062	385.1	151.1	2.12	386.1	[M-H]-	Eudesmoyl quinic acid	Organic acids and derivatives	83500	82000	85400	65700	63300	64300	40500	40000	51800	69000	89800	120000	140000	140000	218000	113000	86600	107000	9	9	9	-
304	pmb3079	300.1	96.9	1.15	301.1	[M-H]-	N-Acetylglucosamine 1-phosphate	Others	54700	75900	62600	21700	51200	8790	113000	53300	34500	36800	55500	16900	209000	195000	418000	273000	462000	381000	9	9	9	C04256
305	pmb3088	421.1	241.1	0.71	422.1	[M-H]-	Trehalose 6-phosphate	Carbohydrates	1280000	1220000	1300000	2460000	3010000	2020000	4840000	2450000	2390000	2100000	2230000	1270000	150000	156000	161000	328000	598000	388000	9	9	9	C00689
306	pmb3093	351.1	105.1	2.39	352.1	[M-H]-	6,7-dihydroxycoumarin 7-O-quinic acid	Phenylpropanoids	5510000	10200000	13700000	13800000	12500000	17500000	7700000	5800000	14800000	15000000	14600000	18400000	4420000	4750000	7960000	9590000	8460000	10700000	9	9	9	-
307	pmb3094	703.4	351.1	2.35	704.4	[M-H]-	Esculetin O-quinacyl esculetin O-quinic acid	Phenylpropanoids	32100	70400	79900	60100	45600	105000	38300	20000	79900	93500	94300	105000	7150	9	86700	56800	63300	53900	9	9	9	-
308	pmb3116	474.2	278.3	7.72	475.2	[M-H]-	LysoPE 18:3	Lipids	11800	12500	12200	5600	8850	4380	9	9	9	7260	5650	9920	35200	11600	19300	24400	33500	24700	9	9	9	-
309	pmb3117	452	255.3	8.74	453	[M-H]-	LysoPE 16:0	Lipids	20400000	20600000	18900000	55000000	54400000	61300000	28400000	18600000	41900000	97900000	76700000	76600000	1550000	834000	1570000	1450000	1930000	2160000	9	9	9	-
310	pmb3121	478.1	281.3	9.03	479.1	[M-H]-	LysoPE 18:1	Lipids	3610000	3670000	3850000	3570000	6730000	4340000	4570000	3840000	5160000	7760000	5410000	5970000	4960000	657000	1420000	2040000	1200000	1440000	9	9	9	-
311	pmb3132	478.1	281.2	8.86	479.1	[M-H]-	LysoPE 18:1 (2n isomer)	Lipids	4240000	4270000	3990000	3920000	7130000	4880000	5070000	4070000	5530000	8130000	6280000	6050000	5890000	685000	1560000	2320000	1290000	1780000	9	9	9	-
312	pmb3317	371.1	179.1	1.85	372.1	[M-H]-	Quinacyl syringic acid	Organic acids and derivatives	8260000	8170000	8720000	7400000	9620000	7790000	7820000	9360000	8000000	10500000	8890000	9070000	414000	277000	938000	13000000	14800000	12700000	9	9	9	-
313	pmb3894	329.1	229.1	5.91	330.1	[M-H]-	Di-O-methylquercetin	Flavonol	14600000	13700000	13400000	18200000	19000000	17700000	34200000	25600000	33800000	31400000	37900000	17500000	1090000	711000	363000	369000	434000	490000	9	9	9	-
314	pmb4344	362.1	79.1	1.01	363.1	[M-H]-	Guanosine 5'-monophosphate	Nucleotide and derivates	302000	347000	287000	589000	1190000	294000	601000	932000	430000	343000	433000	156000	5220	10500	8160	40100	68500	59400	9	9	9	C00144
315	pmc0304	384.1	252	2.06	383.12	[M+H]+	Succinyladenosine	Nucleotide and derivates	485000	640000	595000	963000	857000	653000	680000	690000	678000	727000	737000	621000	288000	336000	362000	251000	277000	286000	9	9	9	-
316	pmd0017	203	83	0.62	202	[M+H]+	Spermine	Phenolamides	4970000	3920000	3870000	3130000	2650000	3440000	3550000	3740000	4700000	3720000	3980000	3670000	3920000	4060000	4550000	3440000	3760000	3600000	9	9	9	C00750
317	pmd0023	266	134	1.81	267	[M-H]-	Adenosine	Nucleotide and derivates	824000	744000	822000	491000	964000	454000	1230000	1800000	1200000	1090000	968000	1440000	124000	139000	154000	140000	189000	163000	9	9	9	C00212
318	pmd0144	550.4	184	9.96	549.37	[M+H]+	LysoPC 20:1 (2n isomer)	Lipids	536000	911000	716000	9	1340000	9	9	9	9	9	9	1330000	1980000	484000	708000	1000000	915000	1140000	9	9	9	-
319	pmd0145	550.4	184.1	10	549.37	[M+H]+	LysoPC 20:1	Lipids	630000	817000	806000	9	9	9	9	9	9	704000	537000	1300000	2100000	499000	756000	949000	1030000	1250000	9	9	9	-
320	pmd0158	424.2	227.2	7.51	425.2	[M-H]-	LysoPE 14:0 (2n isomer)	Lipids	51900	54500	50400	54100	63300	60000	48800	26400	50600	119000	89700	157000	22900	9390	14600	12000	12100	13200	9	9	9	-
321	pme0002	611.2	303	4.07	610.19	[M+H]+	Hesperetin 7-O-neohesperidoside (Neohesperidin)	Flavanone	144000000	216000000	208000000	284000000	272000000	230000000	108000000	128000000	126000000	250000000	306000000	156000000	180000000	171000000	154000000	156000000	130000000	162000000	9	9	9	C09806
322	pme0004	190.1	127	0.84	189.11	[M+H]+	L-Homocitrulline	Amino acid and derivatives	203000	199000	252000	234000	9	423000	9	9	9	313000	9	195000	362000	252000	287000	220000	214000	147000	9	9	9	C02427
323	pme0005	121	94	1.44	120.04	[M+H]+	Purine	Nucleotide and derivates	1390000	1510000	1560000	1660000	1500000	1130000	1620000	1570000	1340000	1510000	1400000	1600000	1760000	1570000	1680000	1680000	1500000	1430000	9	9	9	C15587
324	pme0009	104	73.7	0.79	105.04	[M-H]-	L-Serine	Amino acid and derivatives	990000	960000	975000	987000	630000	1220000	155000	264000	164000	575000	576000	919000	1210000	1680000	1030000	1640000	1800000	1460000	9	9	9	C00065
325	pme0011	132	88	0.8	133.04	[M-H]-	L-Aspartic acid	Amino acid and derivatives	1470000	1490000	1410000	2170000	4020000	1990000	2020000	1670000	1210000	1370000	2240000	1190000	725000	1310000	1300000	1330000	1360000	1130000	9	9	9	C00049
326	pme0013	146.1	102	0.75	147.05	[M-H]-	L-Glutamic acid	Amino acid and derivatives	2470000	2470000	2300000	1570000	2470000	1840000	771000	1090000	863000	1290000	1350000	1020000	2780000	3940000	5020000	4420000	5190000	3710000	9	9	9	C00025
327	pme0015	239	62	0.78	240.02	[M-H]-	L-(-)-Cystine	Amino acid and derivatives	874000	906000	890000	881000	1030000	1060000	1410000	844000	1240000	1190000	974000	924000	1220000	1040000	763000	841000	1190000	825000	9	9	9	C00491
328	pme0018	130.1	84	1.27	131.09	[M-H]-	L-Leucine	Amino acid and derivatives	296000	310000	253000	87600	52200	70900	9	9	9	145000	146000	99800	847000	1010000	206000	664000	638000	730000	9	9	9	C00123
329	pme0020	164.1	103	1.92	165.08	[M-H]-	L-Phenylalanine	Amino acid and derivatives	4220000	4460000	4580000	3610000	3200000	3910000	1950000	1640000	2690000	3150000	3090000	4590000	6070000	7480000	4360000	5020000	4320000	5640000	9	9	9	C00079
330	pme0022	118	73.9	0.76	119.06	[M-H]-	L-Threonine	Amino acid and derivatives	1850000	1670000	1680000	2400000	1550000	2500000	572000	823000	504000	2340000	2250000	2200000	1330000	1890000	1370000	1830000	1850000	1390000	9	9	9	C00188
331	pme0025	209.1	146	1.92	208.08	[M+H]+	L-Kynurenine	Amino acid and derivatives	4430000	4480000	4660000	690000	2290000	891000	143000	182000	284000	2340000	1560000	966000	5400000	6450000	10400000	10100000	10900000	12900000	9	9	9	C00328
332	pme0033	137	119	1.16	136.04	[M+H]+	Hypoxanthine	Nucleotide and derivates	12900000	10400000	12400000	33500000	21300000	30900000	9850000	10400000	17900000	18600000	13400000	32300000	3340000	4460000	4130000	3640000	5040000	4980000	9	9	9	C00262
333	pme0036	154.1	137	0.72	155.07	[M-H]-	L-Histidine	Amino acid and derivatives	1440000	1360000	1340000	2010000	3300000	2250000	1010000	1150000	1050000	2320000	1900000	1500000	601000	887000	908000	1220000	1150000	1120000	9	9	9	C00135
334	pme0038	112	95	0.82	111.04	[M+H]+	Cytosine	Nucleotide and derivates	131000	161000	142000	158000	126000	173000	261000	237000	198000	130000	124000	158000	153000	162000	134000	191000	188000	155000	9	9	9	C00380
335	pme0039	118.1	72.1	0.85	117.08	[M+H]+	L-Valine	Amino acid and derivatives	181000	248000	318000	204000	209000	225000	196000	255000	312000	307000	221000	258000	153000	205000	164000	135000	200000	190000	9	9	9	C00183
336	pme0043	175	116	0.73	174.11	[M+H]+	L-(+)-Arginine	Amino acid and derivatives	6540000	5940000	6930000	9	2650000	1700000	9	9	9	1840000	2400000	2640000	10400000	17800000	12000000	11900000	9230000	14600000	9	9	9	C00062
337	pme0049	110	92	0.76	109.02	[M+H]+	2-Aminoethanesulfinic acid	Organic acids and derivatives	499000	575000	688000	704000	871000	878000	839000	665000	960000	710000	821000	623000	566000	709000	582000	568000	638000	682000	9	9	9	C00519
338	pme0050	203	116	2.39	204.09	[M-H]-	L-Tryptophan	Amino acid and derivatives	5840000	5850000	5580000	3730000	4710000	3730000	1420000	1660000	2380000	3910000	3820000	4750000	12400000	17000000	14300000	9640000	7990000	10600000	9	9	9	C00078
339	pme0056	145.1	101	2.57	146.06	[M-H]-	2,3-dimethylsuccinic acid	Amino acid and derivatives	1320000	1320000	1240000	1290000	1770000	1260000	1030000	1030000	1060000	1060000	1230000	1380000	1790000	2180000	2040000	1480000	1110000	1780000	9	9	9	-
340	pme0063	517.3	499	5.88	516.31	[M+H]+	Cucurbitacin D	Terpene	872000	943000	865000	9	9	9	9	9	406000	9	9	1080000	1640000	1630000	2070000	1370000	1110000	1360000	9	9	9	C08796
341	pme0064	513.3	203	6.42	514.29	[M-H]-	Cucurbitacin I	Terpene	53100	49500	52700	121000	48100	68500	62600	38500	164000	73600	68600	50200	14200	11600	15300	6230	3920	3560	9	9	9	C08800
342	pme0066	116.1	74	0.75	117.05	[M-H]-	Guanidineacetic acid	Amino acid and derivatives	48800	44200	69200	71300	78900	41900	91700	74800	72100	125000	60400	42500	33500	36900	29800	30300	32700	14900	9	9	9	C00581
343	pme0108	126.1	109	1.16	125.06	[M+H]+	5-Methylcytosine	Nucleotide and derivates	6780000	6490000	6490000	186000	489000	249000	69000	66900	125000	389000	345000	305000	34900000	37700000	40800000	1920000	2050000	1950000	9	9	9	C02376
344	pme0109	212.2	166	1.45	211.08	[M+H]+	(-)-3-(3,4-Dihydroxyphenyl)-2-methylalanine	Amino acid and derivatives	1650000	2210000	2210000	1530000	1210000	1740000	912000	773000	1790000	3460000	9320000	1100000	514000	480000	661000	236000	221000	266000	9	9	9	C07194
345	pme0121	187.2	145	1.14	188.12	[M-H]-	N6-Acetyl-L-lysine	Amino acid and derivatives	696000	727000	725000	779000	1260000	522000	605000	945000	525000	673000	858000	323000	356000	169000	94600	126000	89000	193000	9	9	9	C02727
346	pme0130	165.1	150	1.85	166.05	[M-H]-	3-Methylxanthine	Nucleotide and derivates	383000	391000	397000	171000	225000	204000	299000	432000	277000	328000	279000	176000	587000	593000	785000	446000	465000	507000	9	9	9	C16357
347	pme0133	281.3	166	2.37	280.11	[M+H]+	Asp-phe	Amino acid and derivatives	631000	742000	874000	248000	647000	328000	62000	140000	164000	562000	494000	259000	1400000	1300000	1810000	1560000	1820000	2040000	9	9	9	-
348	pme0138	189.2	84	1.11	188.08	[M+H]+	Nα-Acetyl-L-glutamine	Amino acid and derivatives	5660000	6260000	5500000	9	2950000	1790000	314000	1170000	1680000	5630000	7980000	1020000	5050000	16600000	18900000	5800000	6900000	12200000	9	9	9	-
349	pme0161	118.1	72	0.75	119.06	[M-H]-	L-Homoserine	Amino acid and derivatives	50000	57100	35900	98600	51700	77300	62900	79100	47800	91500	78300	60100	18300	25900	25600	27500	29800	15300	9	9	9	C00263
350	pme0164	263.1	204	3.9	264.11	[M-H]-	N-γ-Acetyl-N-2-Formyl-5-methoxykynurenamine	Amino acid and derivatives	196000	243000	210000	300000	322000	288000	145000	153000	130000	123000	166000	134000	300000	191000	281000	220000	238000	291000	9	9	9	C05642
351	pme0176	263.1	145	3.17	264.11	[M-H]-	Phenylacetyl-L-glutamine	Amino acid and derivatives	1370000	1360000	1380000	1590000	4210000	1080000	1390000	1240000	2200000	1650000	1860000	1060000	616000	641000	804000	430000	458000	573000	9	9	9	C04148
352	pme0180	168.1	151.1	0.72	169.09	[M-H]-	1-Methylhistidine	Amino acid and derivatives	10500	7410	5930	16200	42000	9	14900	14100	9	8530	9	9	9	9	11500	12100	14100	9	9	9	9	C01152
353	pme0182	150.1	107	0.86	151.05	[M-H]-	2-Hydroxy-6-aminopurine	Nucleotide and derivates	47300	30800	43000	66000	47000	46700	74200	43500	70200	32200	39700	28800	9	9	9	8350	9	9	9	9	9	-
354	pme0191	189.1	86	1.91	188.12	[M+H]+	N-Glycyl-L-leucine	Amino acid and derivatives	386000	422000	450000	464000	282000	303000	9	9	9	266000	235000	329000	302000	413000	269000	814000	1050000	1270000	9	9	9	C02155
355	pme0197	609.2	301	3.7	610.15	[M-H]-	Quercetin 3-O-rutinoside (Rutin)	Flavonol	3470000	3520000	3430000	3350000	4190000	3590000	2560000	3180000	2480000	4080000	3820000	2710000	3220000	3250000	3890000	3270000	3340000	3150000	9	9	9	C05625
356	pme0199	301	151	5.12	302.04	[M-H]-	Quercetin	Flavonol	5370000	4870000	4720000	5530000	4670000	5010000	6600000	7600000	6630000	7370000	5660000	3570000	1010000	724000	690000	577000	557000	408000	9	9	9	C00389
357	pme0200	287	153	5.73	286.05	[M+H]+	Kaempferol	Flavonol	295000	293000	273000	414000	362000	314000	306000	340000	466000	289000	297000	274000	9	9	9	9	9	9	9	9	9	C05903
358	pme0205	289.1	245	3	290.08	[M-H]-	Catechin	Polyphenol	219000	244000	470000	177000	216000	94400	9	9	140000	213000	174000	288000	402000	937000	846000	595000	548000	580000	9	9	9	C06562
359	pme0207	103	59.1	1.29	104.05	[M-H]-	3-Hydroxybutyrate	Organic acids and derivatives	4510000	4630000	4930000	9710000	8790000	7250000	8180000	17500000	8410000	4630000	5040000	3740000	1560000	1580000	2330000	2060000	2050000	2440000	9	9	9	-
360	pme0231	247.1	130	4.07	246.1	[M+H]+	N-(3-Indolylacetyl)-L-alanine	Amino acid and derivatives	1210000	1530000	1090000	759000	3300000	812000	1460000	2030000	217000	620000	1720000	135000	425000	821000	1230000	2450000	4140000	3350000	9	9	9	-
361	pme0233	188	144	2.64	189.04	[M-H]-	Kynurenic acid	Organic acids and derivatives	1070000	1130000	1080000	335000	835000	260000	1320000	1650000	1510000	1190000	979000	961000	987000	1190000	1720000	840000	900000	826000	9	9	9	C01717
362	pme0237	183.1	137	4.77	182.06	[M+H]+	Ethyl 3,4-Dihydroxybenzoate (Ethyl protocatechuate)	Organic acids and derivatives	215000	287000	232000	648000	267000	409000	669000	544000	730000	293000	390000	356000	144000	9	9	9	9	9	9	9	9	-
363	pme0238	113	95	2.14	112.02	[M+H]+	2–furanoic acid	Organic acids and derivatives	61100	89800	80000	142000	127000	53300	99900	114000	117000	9	47900	82100	43100	40400	89300	72400	50500	59800	9	9	9	-
364	pme0241	123	79	4.57	122.04	[M+H]+	Benzoic acid	Organic acids and derivatives	284000	346000	360000	579000	383000	447000	471000	475000	410000	287000	323000	340000	110000	98400	139000	112000	130000	103000	9	9	9	C00180
365	pme0247	130.1	84	0.76	131.06	[M-H]-	trans-4-Hydroxy-L-proline	Amino acid and derivatives	28000	20600	11500	25900	41700	29000	29900	20900	16900	34400	33700	18700	9	9	9	9	5670	4540	9	9	9	C01157
366	pme0250	187.1	125	4.47	188.1	[M-H]-	Azelaic acid	Organic acids and derivatives	790000	755000	807000	1440000	1020000	1320000	1040000	809000	1250000	926000	1100000	688000	458000	456000	368000	180000	200000	237000	9	9	9	C08261
367	pme0252	172.1	130	3.51	173.11	[M-H]-	N-Acetyl-l-leucine	Amino acid and derivatives	25900000	26300000	26200000	19600000	21700000	21100000	17000000	21800000	13500000	21600000	26000000	15700000	37600000	49200000	51200000	25000000	29200000	30700000	9	9	9	C02710
368	pme0255	242.1	109	1.19	243.09	[M-H]-	Cytidine	Nucleotide and derivates	217000	200000	179000	695000	429000	486000	207000	178000	486000	193000	321000	219000	28600	49300	91700	43100	92700	59300	9	9	9	C00475
369	pme0265	203.1	121	5.06	202.12	[M+H]+	Sebacate	Organic acids and derivatives	1910000	2050000	2450000	1450000	9	1010000	2170000	2870000	1960000	1050000	875000	9	3010000	3320000	3460000	9	9	9	9	9	9	C08277
370	pme0267	131	87	2.12	132.04	[M-H]-	2-Methylsuccinic acid	Organic acids and derivatives	2970000	3130000	3160000	4750000	3410000	3220000	2840000	2790000	2950000	2640000	3400000	3780000	2540000	2470000	2200000	1560000	1430000	1780000	9	9	9	-
371	pme0269	229.2	211	6.16	230.15	[M-H]-	Dodecanedioic aicd	Organic acids and derivatives	32500	32000	34900	37700	42900	59400	80200	60200	66000	41800	46400	18500	9	9	9	9	9	9	9	9	9	C02678
372	pme0272	149	77	2.43	150.03	[M-H]-	Benzoylformic acid	Organic acids and derivatives	83300	73100	60900	55000	114000	92700	253000	182000	220000	9	9	9	66900	9	9	9	9	9	9	9	9	C02137
373	pme0275	115	97	1.93	116.05	[M-H]-	4-Oxopentanoate	Organic acids and derivatives	60500	70900	70400	76700	55900	109000	206000	226000	133000	90600	84100	53400	19400	23300	23200	15600	9	9	9	9	9	-
374	pme0279	189.1	171	0.79	190.1	[M-H]-	2,6-Diaminooimelic acid	Amino acid and derivatives	1730000	1640000	1570000	2200000	2130000	2620000	3140000	2120000	2520000	1770000	1940000	1370000	1320000	1180000	798000	929000	776000	732000	9	9	9	C00666
375	pme0285	146.1	87	0.84	145.09	[M+H]+	4-Guanidinobutyric acid	Organic acids and derivatives	23800	34900	39700	23100	45200	30300	17900	24000	26800	31100	28900	26500	34200	24900	35500	26800	26800	22100	9	9	9	C01035
376	pme0286	131.1	85	3.52	132.08	[M-H]-	2-Hydroxyisocaproic acid	Organic acids and derivatives	1470000	1490000	1480000	2340000	1270000	2510000	2980000	1900000	4030000	1430000	1260000	1990000	215000	207000	221000	102000	107000	142000	9	9	9	-
377	pme0292	195.1	121	3.95	196.07	[M-H]-	(3,4-Dimethoxyphenyl) acetic acid	Organic acids and derivatives	54200	55200	72500	100000	89300	106000	56800	70900	99100	54000	37400	67900	9	9	9	9	9	9	9	9	9	-
378	pme0299	147.1	77	5.45	148.05	[M-H]-	trans-Cinnamate	Phenylpropanoids	74100	69000	70500	71900	111000	135000	131000	80300	204000	57200	59800	186000	9	9	9	9	9	9	9	9	9	C00423
379	pme0303	179	135	3.23	180.04	[M-H]-	Caffeate	Phenylpropanoids	6810000	7050000	6870000	19400000	7150000	15100000	11300000	9540000	10600000	5150000	4600000	4600000	9	9	9	9	9	9	9	9	9	C01197
380	pme0305	193.1	134	4.07	194.06	[M-H]-	Ferulic acid	Phenylpropanoids	21700000	21700000	21000000	42000000	14500000	26500000	35800000	40600000	42000000	27900000	20900000	38400000	213000	212000	331000	141000	153000	161000	9	9	9	C01494
381	pme0309	183	124	3.14	184.04	[M-H]-	Methyl gallate	Organic acids and derivatives	46800	45100	57800	58400	53600	47700	86900	109000	95200	61000	63800	9	9	9	9	9	9	9	9	9	9	-
382	pme0310	197.1	124	3.87	198.05	[M-H]-	Ethyl gallate	Organic acids and derivatives	53900	47700	37700	21700	9	33700	24800	75800	60000	289000	9	9	9	9	9	28700	124000	48400	9	9	9	-
383	pme0321	431.1	285	4.94	432.11	[M-H]-	Kaempferol 7-O-rhamnoside	Flavonol	100000	79700	81300	90000	126000	132000	59000	83500	68900	138000	76300	81700	92400	83100	93500	79200	74500	66700	9	9	9	-
384	pme0331	581.2	273	4.16	580.18	[M+H]+	Naringenin 7-O-neohesperidoside (Naringin)	Flavanone	77200	114000	47500	9	214000	75500	9	9	9	126000	194000	112000	9	9	9	9	9	107000	9	9	9	C09789
385	pme0332	577.2	269	4.01	578.16	[M-H]-	Apigenin 7-O-neohesperidoside (Rhoifolin)	Flavone	23800	28600	34100	9	9	9	9	9	9	9	9	9	55500	43400	68700	51900	77700	64800	9	9	9	C12627
386	pme0359	433.1	271	3.81	432.11	[M+H]+	Apigenin 5-O-glucoside	Flavone	311000	368000	538000	294000	9	522000	122000	9	289000	348000	428000	266000	262000	297000	365000	241000	9	382000	9	9	9	-
387	pme0361	435.1	303	3.98	434.08	[M+H]+	Quercetin 3-alpha-L-arabinofuranoside (Avicularin)	Flavonol	714000	896000	1000000	1060000	674000	1220000	465000	620000	389000	837000	1260000	635000	925000	899000	804000	741000	739000	1030000	9	9	9	-
388	pme0364	301.1	286	5.77	300.06	[M+H]+	Chrysoeriol	Flavone	142000	166000	176000	244000	171000	114000	160000	152000	128000	180000	235000	74600	110000	187000	128000	42500	48900	9	9	9	9	C04293
389	pme0367	577.2	269	4.01	578.16	[M-H]-	Apigenin 7-rutinoside (Isorhoifolin)	Flavone	30300	34300	18200	9	9	9	9	9	9	9	9	9	51800	48200	87000	58400	72500	55800	9	9	9	-
390	pme0372	435.1	273	4.22	434.12	[M+H]+	Naringenin 7-O-glucoside (Prunin)	Flavanone	3360000	3600000	3600000	2190000	8340000	1990000	2980000	6840000	1640000	1420000	2750000	1120000	837000	1930000	3940000	4560000	8720000	5820000	9	9	9	C09099
391	pme0394	151	93	4.16	152.05	[M-H]-	2-Methoxybenzoic acid	Organic acids and derivatives	24400	22700	22700	37100	19500	50400	48100	30600	53600	22500	22100	50400	9	9	9	9	9	9	9	9	9	-
392	pme0397	173.1	93	0.81	174.05	[M-H]-	Shikimic acid	Organic acids and derivatives	2120000	1920000	2060000	1900000	1690000	2270000	2580000	2330000	2040000	1780000	1730000	840000	3160000	2850000	2960000	1970000	1280000	1380000	9	9	9	C00493
393	pme0398	353.1	191	2.72	354.1	[M-H]-	Chlorogenic acid (3-O-Caffeoylquinic acid)	Organic acids and derivatives	1040000	1110000	1030000	1070000	1040000	1060000	952000	723000	1120000	1180000	1190000	1190000	774000	755000	1180000	891000	1070000	1010000	9	9	9	C00852
394	pme0409	199.1	140	3.34	198.05	[M+H]+	Syringic acid	Phenylpropanoids	348000	342000	332000	443000	569000	367000	567000	673000	646000	403000	557000	306000	9	9	9	9	9	9	9	9	9	C10833
395	pme0413	151	136	4	152.05	[M-H]-	Vanillin	Organic acids and derivatives	682000	806000	671000	950000	662000	845000	1040000	1120000	968000	620000	673000	1030000	787000	925000	719000	208000	128000	216000	9	9	9	C00755
396	pme0418	165.1	119	3.71	166.06	[M-H]-	3-(4-Hydroxyphenyl)propionic acid	Phenylpropanoids	3190000	3440000	3440000	6930000	4740000	4580000	6480000	4890000	7200000	3540000	4190000	3520000	181000	189000	279000	148000	118000	159000	9	9	9	C01744
397	pme0433	577	287	4.06	576.13	[M+H]+	Procyanidin A2	Proanthocyanidins	78900	103000	83400	97200	9	80600	9	87400	9	84800	9	69000	95400	70500	85300	48000	78100	50200	9	9	9	C10237
398	pme0442	303	229	2.98	303.24	Protonated	Delphinidin	Anthocyanins	25100000	27000000	27500000	27500000	21400000	26400000	26400000	27800000	30200000	35800000	30700000	16200000	22700000	17500000	24200000	19700000	14300000	18200000	9	9	9	C05908
399	pme0443	493	331	2.94	493	Protonated	Malvidin 3-O-galactoside	Anthocyanins	763000	884000	1130000	9	2400000	652000	526000	1220000	9	1210000	819000	9	1030000	839000	1550000	577000	799000	833000	9	9	9	-
400	pme0450	289	245	3.32	290.3	[M-H]-	L-Epicatechin	Polyphenol	188000	154000	163000	103000	166000	78700	452000	352000	424000	172000	108000	164000	78000	104000	121000	175000	128000	129000	9	9	9	C09727
401	pme0486	117	73	1.33	118.03	[M-H]-	Methylmalonic acid	Organic acids and derivatives	6160000	5920000	5450000	8880000	5080000	8360000	3580000	2620000	4880000	2670000	2790000	4220000	11900000	6650000	12400000	5150000	5340000	4920000	9	9	9	C02170
402	pme0491	138	94	1.47	139	[M-H]-	6-hydroxynicotinic acid	Vitamins and derivatives	789000	650000	806000	896000	596000	1010000	3110000	2400000	3030000	500000	497000	697000	85900	166000	170000	9	87400	97100	9	9	9	C01020
403	pme0496	122	78	1.16	123	[M-H]-	Nicotinic acid	Vitamins and derivatives	2830000	2800000	2690000	4270000	4570000	4790000	5930000	5850000	5860000	3030000	3110000	3660000	444000	467000	1000000	119000	188000	88900	9	9	9	C00253
404	pme0500	503.4	323	0.81	504.17	[M-H]-	D(+)-Melezitose	Carbohydrates	790000	821000	784000	1590000	1090000	1450000	1090000	757000	1030000	1300000	1340000	1020000	83300	103000	104000	173000	184000	131000	9	9	9	-
405	pme0541	160.1	116	5.14	161.05	[M-H]-	Indole-2-carboxylic acid	Indole derivatives	29800	33300	34400	21300	25300	18900	21000	25500	23600	26200	22400	33400	58600	68300	78100	33400	30300	29000	9	9	9	-
406	pme0543	160.1	116	4.37	161.05	[M-H]-	Indole-5-carboxylic acid	Indole derivatives	1100000	1090000	1090000	1520000	1720000	1850000	2750000	2420000	2780000	741000	1270000	795000	555000	234000	257000	75100	68100	86800	9	9	9	-
407	pme1001	136.1	106	1.27	137.08	[M-H]-	L-Tyramine	Amino acid and derivatives	115000	114000	129000	100000	85800	149000	51300	25000	79200	41700	52900	162000	85100	87000	101000	130000	87500	81200	9	9	9	C00483
408	pme1011	121	104	1.33	120.07	[M+H]+	Benzamidine	Others	2530000	2520000	2250000	9	2180000	1520000	9	9	9	9	9	1920000	3780000	3320000	4030000	3710000	3480000	3000000	9	9	9	C01784
409	pme1018	613.2	484	1.16	612.15	[M+H]+	Glutathione oxidized	Amino acid and derivatives	114000	103000	104000	41800	142000	9	9	15600	9	39200	9	44800	94900	235000	308000	251000	675000	327000	9	9	9	C00127
410	pme1063	243.1	110	1.24	244.07	[M-H]-	Uridine	Nucleotide and derivates	4700000	4440000	3870000	6680000	6910000	6370000	5960000	6160000	6980000	4570000	6030000	7040000	1430000	1320000	1210000	1920000	1480000	1350000	9	9	9	C00299
411	pme1070	180.1	119.3	1.16	181.07	[M-H]-	L-(-)-Tyrosine	Amino acid and derivatives	4910000	4590000	4330000	7160000	3230000	8750000	1270000	989000	1610000	5090000	5530000	11500000	5390000	6870000	2030000	4980000	3330000	4010000	9	9	9	C00082
412	pme1097	134.1	107	1.17	135.06	[M-H]-	Adenine	Nucleotide and derivates	8580000	9240000	8250000	11900000	15800000	13900000	6630000	7640000	9040000	11500000	10800000	10200000	3430000	3660000	3310000	4050000	4710000	5080000	9	9	9	C00147
413	pme1104	130.1	82	1.26	131.1	[M-H]-	L-Isoleucine	Amino acid and derivatives	133000	142000	145000	9	9	9	9	9	9	9	9	9	481000	648000	88300	301000	325000	384000	9	9	9	C00407
414	pme1107	150	133	1.32	151.05	[M-H]-	Guanine	Nucleotide and derivates	398000	464000	419000	748000	883000	599000	255000	601000	408000	443000	582000	469000	61300	49800	72900	126000	113000	144000	9	9	9	C00242
415	pme1119	269.1	137	0.83	268.08	[M+H]+	Inosine	Nucleotide and derivates	1100000	1050000	1130000	3450000	1850000	2140000	2880000	1420000	2360000	474000	454000	646000	830000	999000	125000	528000	498000	399000	9	9	9	C00294
416	pme1162	169	125	1.74	170.02	[M-H]-	Gallic acid	Organic acids and derivatives	1560000	1670000	1310000	2560000	2920000	2630000	3310000	1970000	3270000	1610000	1360000	964000	9	9	9	9	9	9	9	9	9	C01424
417	pme1175	282.1	150	1.5	283.09	[M-H]-	Guanosine	Nucleotide and derivates	29400000	31400000	29300000	51800000	71600000	39800000	18100000	42300000	28300000	29900000	39800000	32300000	6260000	5020000	5360000	9470000	8800000	11800000	9	9	9	C00387
418	pme1181	266.1	150	1.68	267.1	[M-H]-	Deoxyguanosine	Nucleotide and derivates	257000	300000	272000	179000	314000	153000	51400	125000	57400	582000	506000	377000	411000	116000	129000	55700	39800	52200	9	9	9	C00330
419	pme1187	257.1	124	1.76	258.09	[M-H]-	5-Methyluridine	Nucleotide and derivates	51200	54100	57000	88800	87000	58400	64800	78300	68600	46800	60900	48500	9	9	9	9	9	9	9	9	9	-
420	pme1201	273.1	167	5.56	274.08	[M-H]-	Phloretin	Flavanone	32700	34400	30100	35700	111000	34800	9	9	9	64500	53500	24900	9	9	9	22800	29900	22300	9	9	9	C00774
421	pme1218	124	106	1.15	123.03	[M+H]+	2-Picolinic acid	Organic acids and derivatives	3350000	4300000	4310000	6240000	7020000	5240000	3370000	3830000	4410000	9070000	6350000	7110000	208000	276000	305000	196000	193000	201000	9	9	9	C10164
422	pme1283	383	134	1.36	384.12	[M-H]-	S-(5'-Adenosy)-L-homocysteine	Amino acid and derivatives	258000	214000	111000	9	9	220000	9	9	85900	534000	263000	435000	78800	75100	109000	208000	166000	228000	9	9	9	C00021
423	pme1292	167.1	123	2.12	168.04	[M-H]-	Homogentisic acid	Organic acids and derivatives	1260000	1260000	1340000	800000	1350000	786000	1160000	1130000	968000	1270000	1350000	1080000	2770000	2520000	2950000	1970000	1830000	1800000	9	9	9	C00544
424	pme1294	283	151	1.75	284.08	[M-H]-	Xanthosine	Nucleotide and derivates	36200000	36600000	36500000	36600000	78100000	34300000	37500000	36600000	49600000	54700000	61400000	33000000	7600000	4670000	5980000	4880000	5000000	5680000	9	9	9	C01762
425	pme1310	235.1	190	1.98	236.08	[M-H]-	N'-Formylkynurenine	Amino acid and derivatives	29100	23300	25400	9	9	9	9	9	9	9	9	9	64200	79400	106000	58400	57300	96100	9	9	9	C02700
426	pme1322	215.1	173	1.14	216.12	[M-H]-	Nα-Acetyl-L-arginine	Amino acid and derivatives	2690000	2520000	2200000	2400000	1430000	4610000	892000	262000	2840000	9270000	9490000	1600000	792000	1210000	2800000	303000	1540000	845000	9	9	9	-
427	pme1346	300.1	168	1.59	299.09	[M+H]+	8-Hydroxyguanosine	Nucleotide and derivates	513000	557000	792000	9	1020000	9	382000	690000	9	689000	833000	9	526000	609000	740000	712000	830000	711000	9	9	9	-
428	pme1368	128	82	1.16	129.08	[M-H]-	L-Pipecolic acid	Amino acid and derivatives	638000	672000	769000	654000	872000	545000	540000	541000	635000	801000	1170000	765000	125000	122000	122000	112000	174000	132000	9	9	9	C00408
429	pme1373	306	110	1.17	307.06	[M-H]-	2'-Deoxycytidine-5'-monophosphate	Nucleotide and derivates	24600	15700	18800	59400	33700	49900	43100	41200	60700	26800	23200	36000	8340	13600	14700	17700	9780	18900	9	9	9	C00239
430	pme1378	282.1	149.6	2.27	281.11	[M+H]+	1-Methyladenosine	Nucleotide and derivates	1920000	2120000	2070000	3630000	4140000	2550000	3030000	3110000	3170000	1780000	2260000	1510000	783000	792000	546000	691000	665000	965000	9	9	9	C02494
431	pme1382	168	122	1.16	169.07	[M-H]-	Pyridoxine	Vitamins and derivatives	97700	109000	92400	146000	118000	128000	115000	108000	173000	113000	129000	93200	37400	26300	27800	34300	33100	35800	9	9	9	C00314
432	pme1408	145.1	109	0.76	146.07	[M-H]-	L-Glutamine	Amino acid and derivatives	8150000	6720000	7570000	4690000	6210000	5880000	1330000	1970000	1980000	6460000	6160000	5420000	9580000	12200000	13700000	13100000	13300000	11100000	9	9	9	C00064
433	pme1434	371.1	209	2.58	372.14	[M-H]-	Syringin	Phenylpropanoids	2610000	2770000	2630000	1580000	2410000	1950000	2090000	2080000	2890000	2180000	1740000	3160000	3360000	4040000	4860000	3880000	4030000	4600000	9	9	9	C01533
434	pme1436	163	119	3.86	164.05	[M-H]-	p-Coumaric acid	Phenylpropanoids	22700000	22700000	22400000	28000000	36000000	42000000	45100000	28500000	61700000	21800000	20200000	26000000	637000	798000	2010000	550000	1040000	1460000	9	9	9	C00811
435	pme1450	231	145	4.16	232.12	[M-H]-	Melatonin	Alkaloids	55300	68800	45100	9	37900	9	9	9	9	52800	27000	22600	104000	117000	116000	67500	82800	74200	9	9	9	C01598
436	pme1502	315.1	300	7.23	314.08	[M+H]+	Kumatakenin	Flavonol	137000	150000	140000	169000	249000	114000	114000	109000	172000	220000	186000	248000	52000	65000	62000	76800	45300	56100	9	9	9	-
437	pme1510	269.1	251	5.94	270.05	[M-H]-	Baicalein (5,6,7-Trihydroxyflavone)	Flavone	36700	32500	28300	59800	28400	62700	57700	64000	57100	46000	32000	36700	9	9	9	9	9	9	9	9	9	C10023
438	pme1518	403.1	373	7.06	402.13	[M+H]+	Nobiletin	Flavone	339000	313000	374000	238000	396000	361000	324000	413000	509000	290000	291000	383000	386000	289000	311000	291000	382000	352000	9	9	9	C10112
439	pme1521	303.1	125	4.15	304.06	[M-H]-	Dihydroquercetin (Taxifolin)	Flavonol	135000	143000	142000	198000	226000	199000	209000	98100	300000	216000	267000	101000	32500	22400	25800	9	36300	9	9	9	9	C01617
440	pme1535	305	125	2.28	306.07	[M-H]-	(+)-Gallocatechin (GC)	Polyphenol	31700	43100	45900	52100	28300	38200	9	9	9	9	24600	44200	9	9	9	9	41600	33600	9	9	9	C12127
441	pme1539	623.2	314	3.66	624.17	[M-H]-	Isorhamnetin 3-O-neohesperidoside	Flavonol	25300000	25500000	23200000	17200000	25700000	20600000	16700000	31500000	10800000	27800000	25700000	9680000	32600000	29500000	34300000	26200000	23500000	20800000	9	9	9	-
442	pme1550	373.1	343	7.54	372.12	[M+H]+	Tangeretin	Flavone	242000	238000	259000	260000	283000	283000	243000	249000	310000	297000	219000	293000	284000	230000	233000	302000	317000	296000	9	9	9	C10190
443	pme1562	441.3	169	3.89	442.3	[M-H]-	Epicatechin gallate (ECG)	Polyphenol	22000	26500	32300	27800	29500	33000	28300	24200	24400	15900	20300	26000	30100	41100	29400	22600	26500	26900	9	9	9	-
444	pme1578	271.1	215	5.52	270.05	[M+H]+	Genistein (4',5,7-Trihydroxyisoflavone)	Isoflavone	348000	425000	537000	9	469000	9	9	460000	9	330000	309000	9	9	531000	575000	283000	9	356000	9	9	9	C06563
445	pme1580	287.1	135	5.05	288.06	[M-H]-	Eriodictyol	Flavanone	95300	100000	103000	131000	105000	83500	149000	138000	174000	131000	233000	23600	25100	18400	21300	21000	15500	12200	9	9	9	C05631
446	pme1588	315.1	151	5.85	316.06	[M-H]-	Isorhamnetin	Flavonol	109000	111000	109000	186000	190000	316000	138000	106000	87600	329000	378000	160000	10300	12000	9790	21900	22400	18600	9	9	9	C10084
447	pme1598	463.1	301	3.85	464.13	[M-H]-	Hesperetin 5-O-glucoside	Flavanone	28900000	30200000	30200000	27800000	27900000	32400000	21900000	25800000	18000000	41400000	33000000	22700000	25700000	23000000	32700000	26100000	24800000	23300000	9	9	9	-
448	pme1605	593.2	285	3.76	594.16	[M-H]-	Kaempferol 3-O-robinobioside (Biorobin)	Flavonol	1160000	1190000	1190000	1250000	1290000	1630000	801000	966000	924000	1550000	1070000	1320000	893000	913000	1130000	1080000	1000000	800000	9	9	9	-
449	pme1622	447.1	285	3.93	448.1	[M-H]-	Kaempferol 3-O-glucoside (Astragalin)	Flavonol	2390000	2190000	2050000	435000	920000	830000	546000	731000	528000	1560000	1180000	2870000	2650000	2430000	3330000	4560000	5380000	4670000	9	9	9	C12249
450	pme1635	533.3	371	4.85	534.21	[M-H]-	Arctiin	Phenylpropanoids	183000	174000	135000	9	143000	59800	44900	71700	9	168000	93300	93400	225000	242000	301000	373000	305000	382000	9	9	9	C16915
451	pme1638	369.1	193	11.9	370.11	[M-H]-	sesamolin	Phenylpropanoids	1690000	2240000	2420000	2330000	2360000	2460000	2110000	2170000	2330000	2280000	2300000	2520000	1800000	1900000	1960000	2020000	2060000	2240000	9	9	9	-
452	pme1646	357.1	151	5.41	358.14	[M-H]-	Pinoresinol	Phenylpropanoids	281000	262000	264000	385000	301000	320000	411000	258000	728000	360000	738000	192000	84700	66400	31900	28700	32700	29200	9	9	9	-
453	pme1683	477.2	258	2.15	476.17	[M+H]+	D-Pantothenic dcid	Organic acids and derivatives	3110000	3130000	2900000	3700000	12600000	986000	1310000	3770000	9	7710000	10900000	814000	9	9	9	9	9	9	9	9	9	C12276
454	pme1691	147.1	87.2	0.85	146.12	[M+H]+	Acetylcholine	Alkaloids	34400	81500	65200	66900	65300	75900	83200	33900	73400	55200	48600	86700	91900	40400	110000	67700	51900	61900	9	9	9	C08201
455	pme1695	223.1	193	4.06	224.07	[M-H]-	Sinapic acid	Phenylpropanoids	1690000	1660000	1630000	3080000	1920000	2260000	3090000	2910000	3400000	2460000	2260000	2310000	9	9	9	9	9	9	9	9	9	C00482
456	pme1709	138.1	78	3.73	137.05	[M+H]+	Nicotinic Acid Methyl Ester (Methyl Nicotinate)	Vitamins and derivatives	459000	535000	576000	330000	261000	213000	541000	487000	678000	146000	169000	293000	1310000	1040000	1710000	559000	741000	780000	9	9	9	-
457	pme1711	117.1	59	2.03	118.06	[M-H]-	3-Hydroxy-3-methyl butyric acid	Organic acids and derivatives	686000	668000	738000	932000	1020000	677000	1050000	1100000	1240000	719000	684000	663000	332000	304000	377000	143000	137000	150000	9	9	9	-
458	pme1715	277	259	0.79	276.13	[M+H]+	L-Saccharopine	Amino acid and derivatives	24800000	24900000	27000000	27900000	34100000	20400000	50200000	61000000	40200000	22300000	25600000	27200000	3410000	4820000	5020000	2840000	4970000	3350000	9	9	9	C00449
459	pme1806	367	190.9	3.64	368.11	[M-H]-	Chlorogenic acid methyl ester	Organic acids and derivatives	1240000	1180000	1160000	1680000	830000	1800000	1100000	1090000	1500000	1470000	1820000	992000	1160000	1550000	1530000	258000	272000	216000	9	9	9	-
460	pme1814	153	108	2.5	154.03	[M-H]-	2,5-dihydroxybenzoic acid (Gentisic acid)	Organic acids and derivatives	4890000	4910000	4780000	7390000	6450000	7210000	10500000	8130000	11300000	3600000	4460000	3660000	125000	145000	138000	103000	108000	132000	9	9	9	C00628
461	pme1820	151	106.9	3.21	152.05	[M-H]-	p–Hydroxyphenyl acetic acid	Organic acids and derivatives	767000	721000	727000	1630000	1540000	1030000	1410000	1060000	1450000	591000	733000	805000	36800	83700	55800	70600	52000	50200	9	9	9	C00642
462	pme1824	153.1	109	2.48	154.03	[M-H]-	Protocatechuic acid	Polyphenol	16700000	17000000	16100000	24300000	20900000	23000000	39400000	25500000	35800000	12300000	15700000	14100000	570000	640000	703000	349000	486000	481000	9	9	9	C00230
463	pme1830	117	73	1.35	118.03	[M-H]-	Succinic acid	Organic acids and derivatives	5910000	6160000	5520000	8610000	4880000	7920000	3730000	2520000	4750000	2740000	2810000	4230000	11900000	6320000	12400000	5290000	5480000	5070000	9	9	9	C00042
464	pme1841	103	86	0.76	102.12	[M+H]+	1,5-Diaminopentane	Phenolamides	81200	88800	76600	53800	27500	38400	79800	96600	82100	78100	81500	51000	83300	84400	106000	36500	48900	50700	9	9	9	C01672
465	pme1846	179	71	0.77	180.06	[M-H]-	D(+)-Glucose	Carbohydrates	3910000	3650000	3850000	6030000	4680000	5140000	6400000	6180000	5560000	4320000	3550000	3970000	2020000	2410000	3190000	1960000	2530000	1700000	9	9	9	C00031
466	pme1851	130.1	88	0.81	131.07	[M-H]-	Creatine	Organic acids and derivatives	1200000	1260000	1120000	2700000	1340000	1830000	1830000	2100000	1380000	806000	998000	536000	876000	974000	1590000	343000	393000	295000	9	9	9	C00300
467	pme1872	114.1	86	0.81	115.06	[M-H]-	L-Proline	Amino acid and derivatives	291000	279000	324000	591000	1040000	571000	461000	247000	373000	691000	694000	271000	188000	189000	188000	144000	154000	143000	9	9	9	C00148
468	pme1894	183	83	0.76	182.08	[M+H]+	D-Sorbitol	Alcohols	3340000	2680000	2680000	2270000	1760000	2620000	2580000	2590000	2920000	2430000	2430000	2740000	3190000	3150000	2760000	2710000	2570000	2450000	9	9	9	C00794
469	pme1936	114.1	86	0.62	113.06	[M+H]+	Creatinine	Organic acids and derivatives	1970000	2120000	1890000	1980000	961000	1460000	1620000	1990000	2060000	2360000	2530000	1040000	2310000	2880000	2650000	1230000	1310000	1430000	9	9	9	C00791
470	pme1944	183.1	69	0.8	182.08	[M+H]+	D-Mannitol	Alcohols	1380000	1360000	1470000	1430000	520000	2060000	985000	9	1380000	2070000	1740000	1270000	1130000	9	9	9	9	9	9	9	9	C00392
471	pme1949	375	255	3.26	376.14	[M-H]-	Riboflavin	Vitamins and derivatives	603000	591000	514000	361000	538000	331000	478000	590000	536000	468000	513000	637000	847000	960000	784000	799000	733000	818000	9	9	9	C00255
472	pme1966	126	108	0.83	125.02	[M+H]+	2-Aminoethanesulfonic acid	Organic acids and derivatives	200000	192000	197000	9	251000	9	110000	87600	9	9	9	164000	87500	92800	102000	9	9	9	9	9	9	C00245
473	pme1977	173.1	111	3.87	174.09	[M-H]-	Suberic acid	Organic acids and derivatives	328000	285000	351000	384000	266000	304000	781000	714000	662000	255000	263000	192000	318000	187000	215000	51400	56400	55100	9	9	9	C08278
474	pme1987	88	71	0.78	89.05	[M-H]-	L-Alanine	Amino acid and derivatives	14900	10600	7970	31400	23400	16200	39600	31700	30900	19100	23000	22300	9	9	9	9	9	9	9	9	9	C00041
475	pme2006	189.1	87	6.32	188.11	[M+H]+	Diethylglutarate	Organic acids and derivatives	27800	33300	28800	38500	31100	31600	23500	14200	36300	33800	22800	98800	9	9	39000	32700	30600	37300	9	9	9	-
476	pme2009	149	87	1.03	150.02	[M-H]-	L-(+)-Tartaric acid	Organic acids and derivatives	122000	86900	95300	39500	119000	132000	90700	126000	53600	151000	125000	57500	113000	166000	279000	138000	114000	138000	9	9	9	-
477	pme2019	149	59	0.81	150.05	[M-H]-	DL-Arabinose	Carbohydrates	1890000	1700000	1600000	2680000	2260000	2040000	3320000	2820000	4090000	1600000	1300000	1650000	1180000	1390000	2060000	767000	591000	665000	9	9	9	-
478	pme2024	177	160	1.63	176.1	[M+H]+	serotonin	Alkaloids	2410000	2590000	2620000	1060000	5260000	3720000	5850000	7710000	3680000	1420000	2550000	737000	9	1930000	2120000	1060000	1360000	1420000	9	9	9	C00780
479	pme2033	133	71	0.85	134.02	[M-H]-	L(-)-Malic acid	Organic acids and derivatives	24300000	23800000	23100000	22700000	28200000	24200000	21900000	14300000	21700000	28200000	32200000	21100000	11100000	19500000	22800000	17100000	28400000	20700000	9	9	9	C00497
480	pme2036	191	85	0.92	192.06	[M-H]-	Quinic acid	Organic acids and derivatives	2510000	2570000	2500000	2740000	2050000	2740000	3850000	4800000	2250000	1860000	2130000	1010000	2620000	3410000	3930000	1920000	3400000	1860000	9	9	9	C00296
481	pme2046	170	96	0.79	169.18	[M+H]+	3-N-Methyl-L-histidine	Amino acid and derivatives	26200	24200	29600	9	9	34300	9	9	15800	45200	45900	12200	31900	29700	52900	9	9	9	9	9	9	-
482	pme2050	191	111	0.86	192.03	[M-H]-	Citric acid	Organic acids and derivatives	12600000	14900000	14000000	3300000	4880000	3320000	14400000	24900000	4720000	5830000	9090000	3290000	21700000	25600000	40900000	12700000	31800000	16400000	9	9	9	C00158
483	pme2108	163	104	0.68	162.11	[M+H]+	L-Carnitine	Alkaloids	196000	258000	228000	141000	98600	189000	190000	132000	269000	307000	388000	107000	165000	129000	131000	150000	211000	206000	9	9	9	C00318
484	pme2111	175	87	0.85	176.12	[M-H]-	L-ascorbate	Vitamins and derivatives	1090000	1040000	874000	1650000	1150000	2050000	2070000	2370000	1520000	882000	807000	940000	509000	533000	651000	799000	847000	790000	9	9	9	C00072
485	pme2129	131.1	85	3.58	132.08	[M-H]-	(S)-(-)-2-Hydroxyisocaproic acid	Organic acids and derivatives	11100000	11400000	11100000	17900000	9240000	18600000	23100000	14600000	30400000	10700000	9370000	14700000	1660000	1360000	1450000	725000	741000	992000	9	9	9	-
486	pme2136	123.1	69	0.81	122.06	[M+H]+	DL-threitol	Alcohols	23000	36900	27000	18100	13500	31800	13100	15600	26200	59200	44300	37500	20800	31400	26000	9	23400	16200	9	9	9	-
487	pme2155	181	138	2.23	180	[M+H]+	Theobromine	Alkaloids	345000	401000	332000	187000	558000	291000	181000	307000	101000	280000	255000	128000	647000	615000	611000	632000	572000	538000	9	9	9	C07480
488	pme2165	155	111	1.15	156.02	[M-H]-	Orotic acid	Vitamins and derivatives	593000	593000	702000	295000	689000	280000	926000	1520000	460000	457000	591000	403000	751000	858000	1260000	684000	990000	625000	9	9	9	C00295
489	pme2169	115	71	1.19	116.01	[M-H]-	Fumaric acid	Organic acids and derivatives	8590000	8240000	7140000	5180000	10300000	4720000	6570000	5640000	3090000	4260000	7340000	1810000	4940000	10100000	16600000	10600000	14200000	10500000	9	9	9	C00122
490	pme2237	181.1	101	0.76	182.08	[M-H]-	Dulcitol	Alcohols	183000	169000	177000	435000	183000	255000	227000	246000	177000	230000	242000	218000	61300	41800	80500	43500	74200	55800	9	9	9	C01697
491	pme2241	129	85	1.62	130.03	[M-H]-	Citraconic acid	Organic acids and derivatives	1180000	1420000	1340000	1550000	1820000	1730000	3650000	4300000	2260000	1190000	1170000	929000	318000	312000	479000	107000	71500	113000	9	9	9	C02226
492	pme2256	151.1	71	0.77	152.07	[M-H]-	D-Arabitol	Alcohols	31900	44700	24300	98600	98400	34200	193000	212000	76600	20500	37400	11600	8520	12800	21000	9880	17100	7460	9	9	9	C01904
493	pme2263	243.1	200	3.38	244.09	[M-H]-	Biotin	Vitamins and derivatives	39600	38800	38600	31500	44100	26100	9	9	9	45800	56700	41300	28400	40300	37900	42600	37300	47000	9	9	9	C00120
494	pme2277	152	108	1.22	153.04	[M-H]-	3-Aminosalicylic acid	Organic acids and derivatives	325000	298000	274000	351000	479000	392000	608000	441000	645000	183000	202000	613000	52500	52600	9	9	9	9	9	9	9	-
495	pme2278	362	211	1.17	363.06	[M-H]-	Guanosine monophosphate	Nucleotide and derivates	726000	637000	646000	864000	3520000	682000	1230000	3140000	716000	410000	1350000	339000	9	9	32200	185000	360000	266000	9	9	9	-
496	pme2319	301.1	164	5.75	302.08	[M-H]-	Hesperetin	Flavanone	13700	16100	16000	28400	24700	18000	17500	11000	27100	31100	34200	7210	7730	5300	9	9	9	9	9	9	9	C01709
497	pme2427	222.1	180	2.61	223.09	[M-H]-	N-Acetyl-L-tyrosine	Amino acid and derivatives	1360000	1430000	1430000	1410000	2230000	1190000	753000	787000	743000	1380000	1750000	1130000	1890000	2540000	1810000	1200000	1170000	1370000	9	9	9	-
498	pme2433	106	88	0.79	105.08	[M+H]+	Diethanolamine	Others	19300	32200	33000	19600	9	28300	9	9	6490	39000	31700	9	85200	85300	74700	88600	156000	119000	9	9	9	C06772
499	pme2435	163	59	0.76	164.07	[M-H]-	L-Fucose	Carbohydrates	20200	33400	44700	32800	41100	27800	43400	48800	19200	19300	28300	23400	21500	32000	88200	64600	67500	51500	9	9	9	C01019
500	pme2457	447.3	285.2	3.87	448.1	[M-H]-	Luteolin 7-O-glucoside (Cynaroside)	Flavone	1960000	2320000	2330000	2360000	2610000	2140000	2310000	2680000	1990000	2250000	2090000	1950000	2000000	2290000	2130000	2160000	2300000	2180000	9	9	9	-
501	pme2478	137.1	108.4	3.06	138.03	[M-H]-	Protocatechuic aldehyde	Polyphenol	2090000	2130000	2180000	1620000	1040000	1690000	4940000	3200000	3910000	1320000	1560000	1730000	2550000	2230000	2620000	232000	214000	237000	9	9	9	C16700
502	pme2541	103	57	1.56	104.05	[M-H]-	α-Hydroxyisobutyric acid	Organic acids and derivatives	259000	306000	316000	249000	1310000	249000	420000	394000	452000	289000	326000	196000	82700	113000	156000	50600	9	101000	9	9	9	-
503	pme2560	176	134	1.27	175.05	[M+H]+	N-Acetylaspartate	Amino acid and derivatives	3380000	3590000	3290000	2460000	2930000	1890000	4050000	5560000	3550000	1720000	1680000	1770000	5750000	5030000	8120000	4480000	4000000	4840000	9	9	9	C01042
504	pme2563	249.3	128	1.13	250.06	[M-H]-	γ-Glu-Cys	Amino acid and derivatives	29500	31900	33900	9	9	9	9	36100	22900	33900	33100	9	13500	30700	27900	39100	43000	64000	9	9	9	C00669
505	pme2569	219	202	1.16	218.09	[M+H]+	(5-L-Glutamyl)-L-amino acid	Amino acid and derivatives	163000	147000	125000	65300	97500	88000	9	64600	9	82000	56900	9	302000	257000	352000	256000	156000	185000	9	9	9	C03740
506	pme2575	225.2	154	0.72	226.11	[M-H]-	L-Carnosine	Amino acid and derivatives	25100	20900	19700	40800	67300	46300	28900	25800	37700	46600	42600	34700	9	9	9	9	9	9	9	9	9	C00386
507	pme2594	182.1	138	1.66	183.05	[M-H]-	4-Pyridoxic acid	Alkaloids	3900000	4260000	3720000	3050000	3640000	2200000	5180000	6360000	5310000	4840000	5380000	3060000	1710000	2380000	3180000	3740000	3820000	3170000	9	9	9	C00847
508	pme2598	167.1	123	2.44	168.04	[M-H]-	3,4-Dihydroxybenzeneacetic acid	Organic acids and derivatives	2920000	2460000	2860000	2500000	2460000	3270000	3360000	3350000	2930000	2320000	2370000	2160000	3450000	3270000	3750000	1990000	1870000	1800000	9	9	9	-
509	pme2603	152	108	2.66	153.04	[M-H]-	3-Hydroxyanthranilic acid	Organic acids and derivatives	236000	250000	246000	331000	294000	291000	376000	333000	467000	191000	189000	190000	9	9	9	9	9	9	9	9	9	C00632
510	pme2607	192.1	146	3.17	191.06	[M+H]+	5-Hydroxyindole-3-acetic acid	Indole derivatives	640000	700000	753000	556000	743000	666000	366000	524000	422000	1070000	650000	588000	493000	482000	565000	544000	531000	637000	9	9	9	C05635
511	pme2617	166	102	0.76	165.05	[M+H]+	Methionine sulfoxide	Amino acid and derivatives	566000	646000	677000	640000	496000	654000	619000	627000	746000	674000	679000	685000	636000	646000	665000	544000	582000	672000	9	9	9	-
512	pme2658	175	144	2.96	174.12	[M+H]+	N-Methyltryptamine	Alkaloids	366000	390000	269000	725000	395000	602000	667000	531000	779000	440000	424000	794000	9	9	9	9	9	9	9	9	9	C06213
513	pme2661	383	323	5.46	384.34	[M-H]-	Vitamin D3	Vitamins and derivatives	39100	31600	45800	93500	62300	40400	111000	145000	70900	120000	156000	31100	9	9	66000	63000	30700	66800	9	9	9	C05443
514	pme2670	121	92	3.72	122.04	[M-H]-	4-Hydroxybenzaldehyde	Organic acids and derivatives	1300000	1150000	1260000	1110000	803000	1000000	2120000	1610000	2000000	849000	951000	1710000	1320000	2000000	1670000	263000	261000	294000	9	9	9	C00633
515	pme2698	313.4	166	3.62	312.15	[M+H]+	Phe-Phe	Amino acid and derivatives	184000	176000	210000	154000	242000	117000	9	9	9	119000	86900	99500	110000	178000	154000	322000	358000	525000	9	9	9	-
516	pme2702	144.1	102	1.62	145.07	[M-H]-	4-Acetamidobutyric acid	Organic acids and derivatives	342000	367000	375000	372000	526000	315000	469000	643000	487000	302000	264000	270000	9	9	9	159000	137000	9	9	9	9	C02946
517	pme2706	153.2	109	2.42	154.03	[M-H]-	2,3-Dihydroxybenzoic acid	Organic acids and derivatives	17000000	17700000	16300000	24000000	21600000	24200000	41200000	25400000	37200000	12400000	16000000	14700000	703000	748000	787000	483000	596000	586000	9	9	9	C00196
518	pme2709	117.1	71	2.3	118.06	[M-H]-	2-Hydroxy-2-methyl butyric acid	Organic acids and derivatives	23800	30400	25000	26900	93900	19000	28000	25900	33300	25300	47700	22300	9	9	9	9	9	9	9	9	9	-
519	pme2720	144.1	126	4.53	145.05	[M-H]-	Indole-3-carboxaldehyde	Indole derivatives	496000	522000	530000	323000	444000	428000	966000	772000	955000	371000	514000	394000	547000	848000	778000	43500	43100	40600	9	9	9	C08493
520	pme2743	194.1	91	3.66	193.07	[M+H]+	N-Phenylacetylglycine	Amino acid and derivatives	655000	648000	603000	1250000	9	503000	554000	499000	896000	1050000	1050000	1570000	9	9	9	9	9	9	9	9	9	C05598
521	pme2761	161	73	0.95	162.02	[M-H]-	4-Hydroxy-2-oxoglutaric acid	Organic acids and derivatives	474000	433000	382000	1150000	575000	691000	819000	799000	586000	421000	445000	554000	183000	203000	295000	253000	308000	194000	9	9	9	C01127
522	pme2765	181.1	124	2.69	180.07	[M+H]+	1,7-Dimethylxanthine	Nucleotide and derivates	91500	102000	109000	58400	9	77600	121000	88700	89300	103000	75900	103000	144000	192000	172000	137000	170000	124000	9	9	9	C13747
523	pme2776	253.1	137	1.67	252.09	[M+H]+	2'-Deoxyinosine	Nucleotide and derivates	110000	133000	134000	183000	125000	191000	129000	197000	171000	198000	157000	233000	9	9	9	9	9	9	9	9	9	C05512
524	pme2786	219	160	3.32	218.11	[M+H]+	N-Acetyl-5-hydroxytryptamine	Alkaloids	1080000	1290000	1460000	322000	470000	245000	96200	224000	227000	393000	381000	413000	1020000	1390000	1860000	1820000	2000000	2520000	9	9	9	C00978
525	pme2830	140	79	0.75	141.02	[M-H]-	O-Phosphorylethanolamine	Others	76200	82300	77300	26600	71200	29800	29600	33400	19400	93300	64200	55000	83400	85700	108000	113000	186000	117000	9	9	9	-
526	pme2831	130	71.9	0.86	129.1	[M+H]+	1,1-Dimethylbiguanide	Others	132000	114000	125000	161000	157000	9	145000	9	9	132000	163000	130000	9	82300	90300	109000	93400	9	9	9	9	C07151
527	pme2836	178.1	160	2.95	177.08	[M+H]+	5-Hydroxytryptophol	Indole derivatives	501000	405000	461000	365000	696000	279000	560000	1040000	392000	355000	355000	295000	749000	640000	413000	365000	336000	378000	9	9	9	-
528	pme2846	139	106	0.81	138.04	[M+H]+	Nicotinamide-N-oxide	Vitamins and derivatives	171000	169000	98800	142000	74500	211000	101000	100000	112000	302000	394000	188000	96800	116000	133000	62900	70100	78900	9	9	9	-
529	pme2857	174.1	76	3.96	173.11	[M+H]+	Hexanoyl glycine	Amino acid and derivatives	13900	11400	15400	9	9150	6950	9	14200	8480	9	15700	12000	10200	20000	22700	14000	19600	16700	9	9	9	-
530	pme2884	166	124	0.85	167.04	[M-H]-	Guanidinoethyl sulfonate	Organic acids and derivatives	113000	71200	108000	113000	104000	144000	140000	88400	125000	275000	146000	72500	29400	49300	49700	45700	41400	41700	9	9	9	-
531	pme2895	319.1	301	3.52	320.05	[M-H]-	Dihydromyricetin	Flavonol	1240000	1370000	1300000	1260000	2640000	1580000	1060000	812000	2040000	1570000	1450000	1900000	619000	925000	1260000	608000	654000	884000	9	9	9	C02906
532	pme2901	353.1	191.1	2.38	354.1	[M-H]-	1-O-Caffeoyl quinic acid	Organic acids and derivatives	1020000	1030000	887000	1020000	1000000	994000	949000	709000	1070000	1070000	1000000	1170000	791000	677000	1050000	947000	885000	1010000	9	9	9	-
533	pme2903	137	93	3.1	138.03	[M-H]-	4-Hydroxybenzoic acid	Organic acids and derivatives	3970000	4200000	4160000	1140000	2190000	2850000	926000	1710000	1050000	3060000	2660000	1900000	19500000	14300000	10200000	6340000	7250000	5950000	9	9	9	C00156
534	pme2963	287.1	259	4.62	288.06	[M-H]-	Aromadedrin (Dihydrokaempferol)	Flavonol	64800	62100	63000	90700	91000	119000	31100	57800	31200	96000	111000	84900	27800	45400	29900	38800	39800	28700	9	9	9	C00974
535	pme2973	675.2	513	4.98	676.24	[M-H]-	Icariin (kaempferol 3,7-O-diglucoside 8-prenyl derivative)	Flavonol	101000	51600	108000	145000	114000	134000	91200	156000	160000	96000	74700	150000	9	9	9	9	62300	44100	9	9	9	C17555
536	pme2977	347.3	285	6.66	346.25	[M+H]+	Troxerutin (Trihydroxyethyl rutin)	Flavonol	119000	125000	74800	52900	81800	147000	182000	271000	140000	161000	285000	76100	43700	39200	43900	21600	21600	44400	9	9	9	-
537	pme2979	255.1	151	7.04	256.07	[M-H]-	Pinocembrin (Dihydrochrysin)	Flavanone	398000	387000	386000	1370000	405000	1250000	367000	206000	580000	394000	513000	304000	60000	34000	59900	9	9	9	9	9	9	C09827
538	pme2988	149.2	107.1	5.63	148.05	[M+H]+	3,4-Dihydrocoumarin	Phenylpropanoids	64700	78800	90200	122000	84100	114000	98600	84900	116000	117000	137000	120000	9	9	9	9	9	9	9	9	9	C02274
539	pme2991	191	148	4.15	192.04	[M-H]-	Scopoletin (7-Hydroxy-5-methoxycoumarin)	Phenylpropanoids	14700000	14600000	14300000	14800000	17500000	15600000	22300000	30000000	28300000	16100000	21300000	16400000	3460000	3690000	2940000	1480000	2440000	2400000	9	9	9	C01752
540	pme2997	163	121	4.46	162.03	[M+H]+	4-Hydroxycoumarin	Phenylpropanoids	364000	391000	425000	805000	670000	462000	345000	417000	589000	653000	574000	401000	9	9	9	9	9	9	9	9	9	C20414
541	pme3038	130	84	0.85	129.04	[M+H]+	5-oxoproline	Amino acid and derivatives	368000	382000	325000	214000	164000	231000	134000	9	319000	207000	128000	264000	1120000	816000	912000	972000	649000	925000	9	9	9	C01879
542	pme3069	556.3	371	10.27	555.28	[M+H]+	Taurocholic acid	Organic acids and derivatives	19100000	17700000	18400000	14000000	13900000	15600000	16400000	16300000	16100000	17500000	14900000	16900000	15400000	18600000	17500000	16100000	19300000	17500000	9	9	9	C05122
543	pme3093	241	170	0.65	240.12	[M+H]+	(S)-2-(4-Aminobutanamido)-3-(1-methyl-1H-imidazol-5-yl)propanoic acid	Organic acids and derivatives	128000	84000	83500	70100	57100	66500	45800	14600	93200	161000	93800	72900	67300	48200	64900	79700	75100	134000	9	9	9	-
544	pme3100	311	183	9.7	312.3	[M-H]-	Phytanic acid	Lipids	40800000	50400000	50000000	30800000	22800000	27200000	27700000	30700000	21600000	31700000	34200000	27700000	26700000	27800000	34100000	22200000	31100000	23900000	9	9	9	C01607
545	pme3123	209	179	3.88	210.09	[M-H]-	Sinapyl alcohol	Phenylpropanoids	357000	313000	277000	143000	266000	104000	224000	589000	112000	187000	229000	136000	671000	699000	402000	428000	573000	429000	9	9	9	C02325
546	pme3129	463	301	3.86	464.1	[M-H]-	Quercetin 4'-O-glucoside (Spiraeoside)	Flavonol	22800000	26200000	24100000	25200000	23900000	24300000	16000000	20200000	12700000	33600000	24600000	18500000	22700000	22500000	31500000	22400000	22400000	18700000	9	9	9	-
547	pme3140	175	131	4.11	176.05	[M-H]-	6-Hydroxy-4-methylcoumarin	Phenylpropanoids	2680000	2880000	2800000	1080000	3020000	1110000	1110000	2340000	1380000	2650000	2020000	2040000	3790000	4020000	5100000	3710000	3940000	4160000	9	9	9	-
548	pme3151	213	97	1.2	214.02	[M-H]-	Deoxyribose 5-phosphate	Nucleotide and derivates	93000	94500	104000	67900	126000	48000	64300	119000	62800	69000	69100	37500	76300	73900	254000	86800	169000	116000	9	9	9	-
549	pme3160	259	97	0.71	260.03	[M-H]-	D-Glucose 6-phosphate	Carbohydrates	4310000	4550000	4410000	5970000	3510000	3470000	10400000	7870000	5350000	3580000	3560000	1760000	3850000	3280000	3340000	5960000	7970000	5580000	9	9	9	C00092
550	pme3171	322	97	0.82	323.05	[M-H]-	Cytidine 5'-monophosphate (Cytidylic acid)	Nucleotide and derivates	189000	196000	192000	320000	352000	180000	335000	546000	344000	213000	228000	161000	27100	28400	45700	70400	72700	42600	9	9	9	C00055
551	pme3198	153	109	2.75	154.03	[M-H]-	2,4-Dihydroxybenzoic acid	Organic acids and derivatives	18500000	19200000	17900000	26700000	23400000	26900000	43600000	28000000	41100000	13500000	17500000	16600000	773000	840000	807000	529000	564000	756000	9	9	9	-
552	pme3200	74	57	0.71	73.1	[M+H]+	1-methylguanidine	Nucleotide and derivates	33700	35300	51400	48000	52300	42400	45300	51900	70200	41800	56500	50200	45000	33800	37000	44800	39600	39800	9	9	9	-
553	pme3207	141	59	0.69	142.03	[M-H]-	trans,trans-Muconic acid	Organic acids and derivatives	2540000	2490000	2160000	2190000	2130000	2510000	1550000	2460000	1740000	1870000	2520000	2230000	2440000	2000000	2420000	2660000	1880000	2130000	9	9	9	-
554	pme3208	445	283	3.54	446.12	[M-H]-	Glycitin	Isoflavone	728000	831000	920000	983000	729000	857000	327000	404000	407000	934000	901000	1160000	1380000	884000	1130000	1120000	1110000	1320000	9	9	9	C16195
555	pme3209	431	269	4.01	432.11	[M-H]-	Genistein 7-O-Glucoside (Genistin)	Isoflavone	2700000	2640000	2370000	5830000	2760000	6260000	3040000	2530000	5190000	2440000	1940000	4340000	1360000	969000	1690000	932000	1220000	978000	9	9	9	C09126
556	pme3221	165	105	6.51	164.08	[M+H]+	Isoeugenol	Others	41400	55300	64200	9	9	48900	77600	85800	44700	85800	73900	39800	49300	56300	58800	46700	60900	66000	9	9	9	C10469
557	pme3242	269	209	6.82	270.09	[M-H]-	Medicarpin	Phenylpropanoids	7020	6550	8450	32300	7860	27300	11800	8410	11600	9	9	9	9	9	9	9	9	9	9	9	9	C10503
558	pme3246	341	179	2.72	342.13	[M-H]-	Coniferin	Phenylpropanoids	4390000	4310000	4200000	11500000	3460000	9630000	5650000	5470000	5470000	2100000	1960000	2330000	535000	348000	755000	624000	609000	735000	9	9	9	C00761
559	pme3251	283	268	5.13	284.07	[M-H]-	Glycitein	Isoflavone	11700	10100	10400	9	9	9	9	9	9	9	9	9	81800	49400	92200	11600	9420	9	9	9	9	C14536
560	pme3258	269	241	4.48	270.05	[M-H]-	6-Hydroxydaidzein	Isoflavone	57400	66200	46600	9	41800	9	23300	9	9	9	9	9	291000	171000	367000	41300	46200	34900	9	9	9	C14314
561	pme3263	269	225	4.43	270.05	[M-H]-	2'-Hydroxydaidzein	Isoflavone	122000	152000	121000	118000	81400	161000	204000	144000	216000	103000	110000	88400	170000	141000	201000	59700	56800	61200	9	9	9	C02495
562	pme3267	447	285	3.86	448.1	[M-H]-	Kaempferol 3-O-galactoside (Trifolin)	Flavonol	1750000	1920000	1910000	1900000	1870000	1600000	2160000	2470000	1800000	1960000	1830000	1570000	1640000	1750000	2030000	1990000	2010000	1820000	9	9	9	C12626
563	pme3282	273	229	3.4	274.08	[M-H]-	Afzelechin (3,5,7,4'-Tetrahydroxyflavan)	Flavanone	580000	663000	615000	996000	1700000	1920000	513000	314000	1010000	538000	685000	1040000	136000	164000	147000	177000	206000	219000	9	9	9	C09320
564	pme3288	329	314	6.63	330.07	[M-H]-	3,7-Di-O-methylquercetin	Flavonol	21700000	21600000	21600000	18300000	17100000	15100000	18600000	21300000	7940000	32300000	35400000	13200000	16300000	20800000	19800000	16000000	16900000	15300000	9	9	9	C01265
565	pme3295	285	257	6.97	284.07	[M+H]+	Prunetin	Isoflavone	31400	44200	42300	16400	9	9	9	9	9	35700	82100	9	57200	63100	53400	28600	62700	68900	9	9	9	C10521
566	pme3297	433	287	4.49	432.11	[M+H]+	Kaempferol 3-O-rhamnoside (Kaempferin)	Flavonol	791000	671000	710000	540000	975000	905000	334000	616000	349000	1020000	531000	567000	728000	718000	1020000	867000	634000	791000	9	9	9	C16911
567	pme3303	303	257	4.51	302.04	[M+H]+	Tricetin	Flavone	2060000	2050000	2150000	2390000	2380000	2020000	4210000	4380000	3780000	3060000	2620000	1600000	9	9	9	9	9	9	9	9	9	C10192
568	pme3305	149	131	3.67	150.07	[M-H]-	p-Coumaryl alcohol	Phenylpropanoids	44000	30200	45300	103000	58100	78300	93100	67200	86800	25500	21100	14600	9	9	9	9	9	9	9	9	9	C02646
569	pme3309	145.1	101	2.58	146.06	[M-H]-	2-Methylglutaric acid	Organic acids and derivatives	1300000	1350000	1300000	1270000	1830000	1190000	1170000	1170000	1210000	1100000	1220000	1390000	1810000	2350000	2150000	1710000	1070000	1830000	9	9	9	-
570	pme3333	153.1	136.1	1.51	152.06	[M+H]+	1,4-dihydro-1-Methyl-4-oxo-3-pyridinecarboxamide	Alkaloids	148000	311000	342000	704000	718000	421000	171000	491000	232000	389000	446000	365000	65100	57400	75200	93400	103000	113000	9	9	9	-
571	pme3336	382	206	2.06	383.11	[M-H]-	N6-Succinyl Adenosine	Nucleotide and derivates	3590000	3710000	3590000	4870000	5140000	3930000	3520000	3390000	3550000	3190000	4230000	4190000	1890000	2120000	2470000	1630000	1630000	1640000	9	9	9	-
572	pme3346	131.1	85	2.76	132.08	[M-H]-	5-hydroxyhexanoic acid	Organic acids and derivatives	2630000	2510000	2610000	2550000	6130000	2340000	1280000	669000	2760000	2350000	5840000	2190000	1680000	1950000	2430000	1250000	1490000	2180000	9	9	9	-
573	pme3367	161	105	5.96	160.05	[M+H]+	6-MethylCoumarin	Phenylpropanoids	284000	268000	317000	9	136000	9	9	124000	9	65100	9	9	383000	489000	771000	389000	468000	420000	9	9	9	-
574	pme3387	187	145	0.84	188.13	[M-H]-	H-HomoArg-OH	Amino acid and derivatives	407000	429000	424000	969000	743000	705000	336000	349000	559000	1050000	819000	439000	183000	82500	38300	67400	36500	64000	9	9	9	C01924
575	pme3396	289	215	3.65	288.06	[M+H]+	Fustin	Flavonol	449000	551000	475000	550000	705000	732000	354000	347000	365000	724000	556000	590000	442000	422000	609000	441000	508000	473000	9	9	9	C01378
576	pme3399	445.1	283	5.16	446.12	[M-H]-	Sissotrin	Isoflavone	631000	638000	645000	2320000	1270000	1050000	971000	2700000	722000	458000	409000	213000	17100	26200	42300	36800	32300	19800	9	9	9	C05376
577	pme3416	177	133.2	3.24	178.03	[M-H]-	Esculetin (6,7-dihydroxycoumarin)	Phenylpropanoids	10500000	11000000	11300000	12800000	9860000	9580000	20900000	19700000	24100000	9570000	9630000	8150000	2090000	2150000	1640000	733000	782000	932000	9	9	9	C09263
578	pme3425	209.2	149.1	3.56	208.04	[M+H]+	6-Methoxy-7,8-DihydroxyCoumarin	Phenylpropanoids	6460000	6630000	6120000	4750000	5180000	4720000	9340000	11000000	10800000	7230000	5410000	5840000	5170000	4820000	5620000	5190000	6110000	4910000	9	9	9	C09265
579	pme3428	339.1	177	2.72	340.08	[M-H]-	Esculin (6,7-Dihydroxycoumarin-6-glucoside)	Phenylpropanoids	1580000	1460000	1570000	766000	967000	869000	1480000	1600000	1270000	1100000	1050000	1210000	3470000	3870000	3280000	2390000	2640000	2470000	9	9	9	C09264
580	pme3440	273.1	136.9	5.49	272.07	[M+H]+	Butein	Flavanone	41600	56400	81900	46000	100000	82500	64900	104000	45900	28500	33000	78200	116000	91100	171000	60800	62400	90700	9	9	9	C08578
581	pme3442	477.1	301	3.76	478.36	[M-H]-	Quercetin 7-O-β-D-Glucuronide	Flavonol	448000	299000	258000	214000	308000	166000	274000	310000	216000	219000	291000	130000	311000	317000	326000	246000	256000	160000	9	9	9	-
582	pme3459	317.2	299	7.47	316.2	[M+H]+	Caffeyl alcohol	Phenylpropanoids	2790000	2550000	2600000	7960000	3770000	7740000	4470000	6220000	3180000	2800000	2440000	2290000	9	9	9	9	9	9	9	9	9	C09066
583	pme3466	287.1	153	6.98	286.08	[M+H]+	Isosakuranetin (4'-Methylnaringenin)	Flavanone	2710000	2680000	2630000	1270000	2000000	3130000	2800000	3120000	2070000	3380000	3760000	2260000	2390000	2140000	2250000	1920000	2020000	2270000	9	9	9	C05334
584	pme3469	741.2	433	3.35	740.22	[M+H]+	Kaempferol-3-O-robinoside-7-O-rhamnoside (Robinin)	Flavonol	219000	241000	265000	240000	143000	578000	150000	195000	9	151000	191000	9	179000	215000	192000	185000	172000	190000	9	9	9	C10178
585	pme3473	271.1	151	5.59	272.07	[M-H]-	Butin	Flavone	526000	520000	495000	441000	399000	432000	204000	196000	166000	625000	867000	324000	720000	1030000	667000	429000	422000	341000	9	9	9	C09614
586	pme3478	277.1	146	2.84	278.13	[M-H]-	Pantetheine	Vitamins and derivatives	2070000	1730000	1780000	9	9	9	43000	9	81900	179000	131000	95000	5630000	6260000	7140000	3550000	3990000	4270000	9	9	9	C00831
587	pme3502	429.1	267	4.59	430.13	[M-H]-	Formononetin 7-O-glucoside (Ononin)	Isoflavone	4800000	4450000	4430000	4210000	6430000	2430000	2980000	5510000	1140000	3320000	4380000	754000	2330000	3690000	5370000	7750000	8410000	6970000	9	9	9	C10509
588	pme3505	353.2	233	8.4	354.15	[M-H]-	Xanthohumol	Flavanone	11000	6710	7470	9	9	15100	11300	13500	9	15700	14100	9	13300	17500	14500	10000	19600	11400	9	9	9	C16417
589	pme3553	187	131	5.94	186.03	[M+H]+	Psoralen	Phenylpropanoids	16600000	15800000	15800000	6920000	9980000	4020000	10600000	18300000	6560000	7030000	6110000	4070000	12400000	21400000	30600000	19200000	31600000	27500000	9	9	9	C09305
590	pme3564	179	133	3.19	178.03	[M+H]+	Daphnetin	Phenylpropanoids	5120000	5620000	5840000	8020000	4870000	7570000	10500000	9380000	12100000	4820000	5220000	3700000	757000	835000	505000	9	9	9	9	9	9	C03093
591	pme3569	207.1	151	4.77	206.06	[M+H]+	Scoparone	Phenylpropanoids	1240000	1280000	1190000	794000	1220000	734000	475000	836000	633000	1330000	1760000	895000	3140000	2610000	849000	434000	686000	455000	9	9	9	C09311
592	pme3719	165.1	75	0.75	166.05	[M-H]-	D-Xylonic acid	Organic acids and derivatives	19400000	18000000	19200000	29100000	35100000	22600000	46300000	60100000	29700000	18800000	15700000	14200000	9500000	13400000	21700000	12800000	17400000	10900000	9	9	9	-
593	pme3825	196.2	135	1.16	197.07	[M-H]-	3,4-Dihydroxy-DL-phenylalanine	Amino acid and derivatives	68900	64800	72200	131000	67500	109000	43500	11300	52400	74100	76100	205000	137000	156000	44300	82300	53600	85900	9	9	9	C00355
594	pme3835	344.2	150	1.33	345.05	[M-H]-	Guanosine 3',5'-cyclic monophosphate	Nucleotide and derivates	331000	363000	369000	311000	816000	239000	243000	526000	258000	330000	306000	304000	65400	96300	78300	508000	545000	1210000	9	9	9	C00942
595	pme3840	204.1	102	0.76	205.13	[M-H]-	Pantothenol	Alcohols	673000	627000	606000	1890000	700000	908000	1350000	1310000	1230000	1150000	803000	1240000	9	9	9	9	9	9	9	9	9	C05944
596	pme3971	245	125	1.21	244.07	[M+H]+	β-Pseudouridine	Nucleotide and derivates	479000	428000	469000	326000	238000	431000	273000	197000	446000	522000	718000	324000	540000	540000	9	271000	419000	309000	9	9	9	C02067
597	pme3982	267.1	135	1.48	268.08	[M-H]-	Hypoxanthine-9-β-D-arabinofuranoside	Nucleotide and derivates	9740000	10600000	9410000	11300000	21200000	8510000	11900000	11700000	17300000	10400000	10400000	9150000	6310000	4690000	5560000	3500000	3680000	3550000	9	9	9	-
598	pmf0006	581.2	273	4.05	580.53	[M+H]+	Narirutin	Flavone	53400	54100	93700	9	218000	133000	9	9	9	121000	250000	65800	9	9	9	9	9	48300	9	9	9	C09793
599	pmf0010	203	147	4.86	202.03	[M+H]+	Xanthotoxol	Phenylpropanoids	5400000	5650000	5400000	2930000	6100000	2200000	9	9580000	9	4000000	4130000	1720000	6630000	7660000	8770000	8370000	10200000	8760000	9	9	9	C00841
600	pmf0014	355.1	193	3.01	354.31	[M+H]+	Scopolin	Phenylpropanoids	9320000	13000000	8850000	3410000	4440000	4530000	5960000	8570000	5430000	7940000	5470000	6750000	19000000	15100000	12200000	13000000	13700000	14100000	9	9	9	C01527
601	pmf0016	150.1	61	0.87	149.05	[M+H]+	DL-Methionine	Amino acid and derivatives	140000	418000	376000	9	9	9	9	9	9	9	9	9	1520000	1520000	588000	509000	567000	673000	9	9	9	-
602	pmf0018	102.1	56	0.76	101.05	[M+H]+	1-Aminocyclopropanecarboxylic acid	Amino acid and derivatives	74400	131000	97000	193000	226000	120000	62000	51800	137000	115000	104000	149000	31200	34500	27900	138000	116000	107000	9	9	9	-
603	pmf0032	341.1	179	0.75	342.12	[M-H]-	Galactinol	Carbohydrates	3010000	2530000	2510000	3160000	2650000	3350000	2560000	1270000	3080000	3510000	2730000	4450000	1590000	2110000	2690000	2190000	3100000	1850000	9	9	9	-
604	pmf0035	259	97	0.78	260.03	[M-H]-	Glucose-1-phosphate	Carbohydrates	4220000	4380000	4450000	6090000	3620000	3410000	10800000	7680000	5160000	3500000	3700000	1690000	3760000	3410000	3380000	5920000	8150000	5640000	9	9	9	-
605	pmf0039	249.2	148	1.96	248.19	[M+H]+	Matrine	Alkaloids	385000	317000	333000	449000	555000	211000	678000	657000	1620000	553000	924000	176000	9	9	9	9	9	9	9	9	9	C10774
606	pmf0042	265.2	148	2.19	264.18	[M+H]+	Oxymatrine	Alkaloids	145000	223000	181000	176000	289000	139000	370000	340000	279000	265000	400000	179000	9	9	9	9	9	9	9	9	9	C10749
607	pmf0052	249.2	150	2.05	248.19	[M+H]+	Sophoridine	Alkaloids	2320000	2040000	2300000	4330000	4070000	2290000	4510000	2520000	4140000	2080000	3500000	1150000	9	9	9	9	9	9	9	9	9	-
608	pmf0057	271.1	151	5.66	272.07	[M-H]-	Naringenin chalcone	Flavanone	497000	524000	518000	449000	401000	437000	200000	199000	165000	654000	876000	308000	710000	1020000	669000	442000	405000	340000	9	9	9	C06561
609	pmf0058	271	150.9	5.66	272.07	[M-H]-	4',5,7-Trihydroxyflavanone	Flavanone	469000	457000	452000	387000	377000	369000	177000	175000	138000	556000	798000	284000	626000	845000	598000	381000	373000	304000	9	9	9	C00509
610	pmf0059	565.1	322.9	0.8	566.06	[M-H]-	UDP-α-D-glucose	Nucleotide and derivates	893000	909000	862000	52100	79200	67000	80600	84500	66200	103000	121000	125000	1980000	2070000	2040000	2130000	2430000	2200000	9	9	9	C00029
611	pmf0063	785.4	623.2	3.31	786.26	[M-H]-	Echinacoside	Phenylpropanoids	1330000	1400000	1390000	1010000	1120000	1210000	1080000	1520000	957000	2460000	1780000	559000	1700000	1390000	1760000	1190000	771000	795000	9	9	9	C10450
612	pmf0070	415.4	119.2	7.75	414.39	[M+H]+	β-Sitosterol	Sterides	4890000	5210000	5110000	2300000	16600000	1770000	1430000	2780000	3180000	2060000	1590000	2070000	2030000	2190000	1970000	12200000	2910000	5370000	9	9	9	C01753
613	pmf0073	399.4	235	12.28	400.37	[M-H]-	Campesterol	Sterides	14000	17800	20600	21200	21100	20800	17800	16700	19200	18500	19900	20000	13800	14900	16000	16000	18100	18000	9	9	9	C01789
614	pmf0076	413.4	301.1	11.55	412.37	[M+H]+	Stigmasterol	Sterides	260000	222000	408000	390000	480000	469000	115000	400000	110000	662000	421000	509000	761000	690000	670000	433000	320000	614000	9	9	9	C05442
615	pmf0079	457.4	375.1	12.32	458.38	[M-H]-	Soyasapogenol B	Sterides	655000	626000	577000	570000	556000	576000	594000	593000	613000	608000	574000	567000	530000	525000	572000	576000	580000	568000	9	9	9	C08980
616	pmf0085	427.4	345	12.26	426.39	[M+H]+	Cycloartenol	Sterides	374000	436000	489000	527000	583000	647000	522000	465000	532000	547000	511000	557000	403000	352000	340000	393000	463000	447000	9	9	9	C01902
617	pmf0091	427.4	345	12.26	426.39	[M+H]+	2,3-Oxidosqualene	Sterides	427000	496000	519000	529000	582000	627000	540000	506000	526000	486000	543000	566000	382000	418000	402000	427000	482000	498000	9	9	9	-
618	pmf0094	179.1	147.1	5.48	178.18	[M+H]+	Methyl p-coumarate	Phenylpropanoids	382000	391000	365000	391000	471000	369000	334000	149000	381000	214000	341000	113000	179000	156000	344000	108000	176000	217000	9	9	9	-
619	pmf0095	207.1	133.1	5.72	208.21	[M-H]-	Methyl ferulate	Phenylpropanoids	1160000	1200000	1130000	4330000	1600000	1400000	774000	399000	251000	2430000	2280000	769000	63400	9	9	9	9	9	9	9	9	-
620	pmf0096	88.9	70.9	1.13	90.03	[M-H]-	Oxalic acid	Organic acids and derivatives	1140000	1040000	1050000	1270000	1550000	1440000	1120000	860000	1130000	1100000	1350000	1030000	405000	779000	776000	557000	944000	720000	9	9	9	C00209
621	pmf0098	177	145	5.53	178.18	[M-H]-	trans-4-Hydroxycinnamic acid Methyl Ester	Phenylpropanoids	228000	211000	227000	217000	333000	238000	230000	114000	265000	146000	203000	96100	85700	83500	207000	68300	91200	118000	9	9	9	-
622	pmf0104	181	117	3.32	180.04	[M+H]+	Caffeic acid	Phenylpropanoids	521000	546000	510000	9	343000	438000	9	9	9	454000	340000	222000	780000	706000	980000	1240000	1430000	1230000	9	9	9	C01481
623	pmf0118	565.1	322.9	0.8	610.02	[M-2Na+H]-	Uridine 5'-diphosphoglucose disodium salt	Nucleotide and derivates	821000	944000	882000	69400	73800	67200	75500	93100	63900	122000	106000	107000	1820000	2130000	1830000	2060000	2600000	2400000	9	9	9	-
624	pmf0126	237.1	178.2	4.05	236.12	[M+H]+	N1-acetyl-5-methoxykynuramine（AMK）	Alkaloids	282000	299000	373000	146000	332000	168000	355000	627000	193000	179000	176000	133000	261000	383000	501000	327000	360000	301000	9	9	9	-
625	pmf0129	229.1	211.1	8.88	228.08	[M+H]+	Benzyl salicylate	Organic acids and derivatives	308000	285000	306000	9	9	296000	328000	389000	203000	288000	389000	197000	9	9	9	9	9	255000	9	9	9	-
626	pmf0131	353.1	135.1	2.92	354.1	[M-H]-	Cryptochlorogenic acid	Organic acids and derivatives	3260000	3000000	2940000	3030000	2680000	3400000	3360000	2780000	4030000	3530000	3230000	2950000	1960000	2100000	3200000	1830000	2170000	1750000	9	9	9	-
627	pmf0138	179	59	0.87	180.063	[M-H]-	D-(+)-Mannose	Carbohydrates	7680000	7250000	6860000	13000000	8840000	9110000	13900000	11900000	12100000	8050000	7330000	8450000	4320000	5800000	5820000	4420000	4230000	3190000	9	9	9	C00159
628	pmf0139	179	59	0.67	180.06	[M-H]-	D-(+)-Galactose	Carbohydrates	6620000	6460000	6310000	10500000	8080000	8330000	11900000	11100000	10400000	7020000	6240000	7040000	3890000	4170000	5140000	3480000	3820000	2990000	9	9	9	C00124
629	pmf0141	121	76.9	4.58	122.07	[M-H]-	2-Phenylethanol	Others	3430000	3610000	2890000	3650000	2090000	2720000	2780000	3260000	3800000	2050000	1460000	1890000	487000	488000	359000	1030000	1580000	438000	9	9	9	C05853
630	pmf0152	291	247	3.02	292.02	[M-H]-	Brevifolincarboxylic acid	Phenylpropanoids	683000	599000	388000	416000	400000	326000	451000	524000	402000	391000	333000	374000	774000	828000	770000	703000	715000	570000	9	9	9	-
631	pmf0171	201	142.9	6.35	200.26	[M+H]+	Camalexin	Alkaloids	1340000	1310000	1270000	440000	1010000	710000	680000	1390000	1110000	776000	758000	847000	3090000	2870000	2410000	900000	1620000	1870000	9	9	9	C21721
632	pmf0174	157.2	157.2	7.72	158.28	[M-H]-	1-Decanol	Alcohols	27800000	28700000	28600000	32900000	24000000	25100000	28800000	26000000	28900000	33300000	28100000	43500000	35500000	23000000	33000000	39600000	38300000	23000000	9	9	9	C01633
633	pmf0175	157.2	157.2	7.84	158.28	[M-H]-	2-Decanol	Alcohols	29600000	29200000	28200000	33000000	23600000	24700000	28400000	26400000	28600000	33100000	27000000	43000000	35600000	23000000	32300000	39200000	37900000	23100000	9	9	9	-
634	pmf0178	207.1	135.1	5.47	208.07	[M-H]-	Ethyl caffeate	Organic acids and derivatives	2870000	2730000	2700000	10200000	3860000	3430000	1950000	958000	625000	5570000	5530000	1910000	9	9	9	9	9	9	9	9	9	-
635	pmf0179	623.2	315.1	4.04	624.17	[M-H]-	Narcissoside	Flavonoid	3710000	3440000	3320000	2310000	3780000	2830000	2520000	4380000	1550000	3910000	3680000	1240000	4120000	4210000	5000000	3600000	3140000	2770000	9	9	9	-
636	pmf0204	465.1	303	3.73	464.1	[M+H]+	Hyperoside	Flavonoid	1750000	1500000	1370000	1350000	1150000	1160000	667000	1070000	1030000	1780000	1480000	1110000	1570000	1440000	1670000	1390000	1120000	1380000	9	9	9	-
637	pmf0208	465.1	303	3.9	464.1	[M+H]+	Isoquercitroside	Flavonoid	1430000	1340000	1420000	1280000	1840000	1700000	957000	1070000	786000	1560000	1560000	1420000	2430000	1330000	1600000	1480000	1160000	1150000	9	9	9	-
638	pmf0211	294.1	137.1	7.38	293.2	[M+H]+	Nordihydrocapsaicin	Alkaloids	86600	64900	77800	146000	84400	125000	88500	81100	80400	80600	64400	154000	40500	60600	44400	19300	31300	15900	9	9	9	C20216
639	pmf0213	195.1	83	3.14	194.08	[M+H]+	Caffeine	Alkaloids	349000	351000	318000	233000	284000	312000	169000	306000	178000	226000	188000	289000	478000	418000	430000	457000	604000	334000	9	9	9	C07481
640	pmf0214	181.1	124.1	2.64	180.06	[M+H]+	Theophylline	Alkaloids	107000	100000	150000	9	38600	72300	60900	85000	82500	115000	65600	77600	107000	154000	211000	124000	143000	149000	9	9	9	C07130
641	pmf0217	259	78.9	0.79	304.1	[M-2Na+H]-	D-Glucose-6-phosphate disodium salt	Others	3970000	3780000	3850000	6280000	4430000	3700000	11600000	8630000	5970000	3550000	3770000	2330000	2410000	2160000	2180000	4030000	5650000	3620000	9	9	9	-
642	pmf0220	259	97	0.8	303.99	[M-2Na+H]-	D-Fructose 6-phosphate-disodium salt	Carbohydrates	4600000	4620000	4360000	6260000	3650000	3610000	11300000	8480000	5600000	3790000	3840000	1780000	4120000	3650000	3410000	6660000	8820000	5960000	9	9	9	-
643	pmf0231	349.9	198	10.08	348.93	[M+H]+	Chlorpyrifos	Alkaloids	580000	407000	421000	107000	120000	123000	403000	349000	377000	124000	194000	265000	1250000	765000	1740000	666000	595000	777000	9	9	9	C14322
644	pmf0243	271.1	98.9	12.27	270.11	[M+H]+	Benzyl β-D-Glucopyranoside	Others	11200000	9850000	9080000	8650000	8850000	8830000	9830000	8990000	10200000	9330000	9380000	9470000	11600000	11000000	10900000	10600000	11100000	10200000	9	9	9	-
645	pmf0253	226.1	148.3	4.22	225.1	[M+H]+	6-Benzylaminopurine	Nucleotide and derivates	114000	84100	73700	111000	71900	107000	162000	193000	124000	115000	132000	125000	9	9	30600	51000	38800	9	9	9	9	C11263
646	pmf0256	101.1	84.7	1.28	102.1	[M-H]-	3-Methyl-1-pentanol	Alcohols	991000	1180000	1380000	358000	1320000	617000	3020000	2120000	1620000	298000	984000	212000	241000	401000	1090000	1110000	2060000	1870000	9	9	9	-
647	pmf0267	160	115.9	4.37	161.05	[M-H]-	Indole-3-carboxylic	Alkaloids	1100000	1120000	1120000	1560000	1750000	1920000	2890000	2560000	2960000	794000	1250000	819000	596000	253000	279000	94700	82900	91800	9	9	9	C19837
648	pmf0269	162.1	117	4.77	161.08	[M+H]+	Tryptophol	Alkaloids	138000	109000	144000	66600	63600	61500	59600	88900	95900	52000	107000	105000	199000	258000	264000	139000	98100	84800	9	9	9	C00955
649	pmf0271	165	146.8	3.86	164.05	[M+H]+	(E)-p-coumaric acid	Phenylpropanoids	607000	716000	668000	827000	1180000	1330000	1280000	769000	1940000	690000	688000	807000	9	9	9	9	9	9	9	9	9	C00811
650	pmf0274	301	211.4	5.13	302.04	[M-H]-	Herbacetin	Flavonoid	15700	13200	14900	21300	13800	11400	19300	27800	21400	20800	17800	8880	9	9	9	9	9	9	9	9	9	-
651	pmf0278	465.1	300.7	4	464.1	[M-H]-	Gossypitrin	Flavonoid	2060000	2050000	2030000	2000000	1810000	2300000	1480000	1830000	1360000	3050000	2130000	1680000	1900000	1800000	2470000	2000000	1910000	1700000	9	9	9	-
652	pmf0280	193	113.1	0.79	194.04	[M-H]-	D-Galacturonic acid	Organic acids and derivatives	1900000	2190000	2350000	869000	816000	679000	1450000	1170000	1540000	2160000	1890000	782000	3050000	4350000	5470000	1790000	3640000	2910000	9	9	9	C00333
653	pmf0282	341.1	113	0.73	342.12	[M-H]-	Melibiose	Carbohydrates	10300000	10400000	9090000	12500000	10200000	12700000	11000000	4920000	12000000	11100000	12200000	16200000	5840000	8160000	8100000	8770000	10000000	6640000	9	9	9	C05402
654	pmf0283	121.1	71	0.81	122.06	[M-H]-	Meso-Erythritol	Alcohols	14200	12300	13900	20400	20000	20100	24500	33400	18200	13200	17000	13800	9	7600	10300	7990	9	9	9	9	9	-
655	pmf0285	179.1	91	4.64	178.06	[M+H]+	4-Hydroxy-3-methoxycinnamaldehyde	Phenylpropanoids	1130000	1370000	1190000	1300000	1070000	2290000	2190000	2480000	2340000	932000	1260000	828000	9	845000	9	9	9	9	9	9	9	C02666
656	pmf0286	295.3	195.2	8.95	296.31	[M-H]-	Phytol	Terpene	17100000	16500000	16100000	6190000	5330000	10500000	58000000	63200000	50300000	4210000	6130000	3020000	912000	732000	1000000	690000	1310000	905000	9	9	9	C01389
657	pmf0289	336.2	148	4.36	335.16	[M+H]+	Riboprine	Nucleotide and derivates	736000	711000	772000	835000	898000	983000	1240000	1590000	1910000	400000	598000	466000	145000	215000	186000	117000	125000	149000	9	9	9	C16427
658	pmf0292	302.3	109.2	7.49	301.3	[M+H]+	D-erythro-sphinganine	Amino acid and derivatives	245000	295000	254000	843000	218000	280000	470000	634000	387000	9	9	127000	9	9	9	9	9	9	9	9	9	C00836
659	pmf0293	269.3	209.2	12.27	270.29	[M-H]-	1-Octadecanol	Lipids	137000	149000	131000	126000	129000	128000	138000	133000	134000	129000	142000	131000	135000	143000	152000	137000	132000	136000	9	9	9	C01924
660	pmf0295	325.1	163	2.83	324.08	[M+H]+	Skimmin	Phenylpropanoids	6150000	8370000	7930000	24600000	5500000	24300000	11700000	10500000	12100000	5300000	4050000	3430000	9	9	9	9	9	9	9	9	9	-
661	pmf0314	289.3	157	4.92	290.26	[M-H]-	ABIENOL	Others	14400	14300	12300	11800	12500	20100	15800	14600	15400	17900	14900	17200	9970	14000	10200	15100	12400	12800	9	9	9	-
662	pmf0316	161	107.2	1.52	160.1	[M+H]+	Anatabine	Alkaloids	54700000	96100000	95200000	54200000	117000000	58100000	64800000	77100000	49700000	84500000	90200000	51000000	97700000	98000000	100000000	113000000	116000000	136000000	9	9	9	C10126
663	pmf0317	147.1	105	1.89	146.08	[M+H]+	Myosmine	Alkaloids	16000	52800	36400	19500	67000	51000	23700	64700	26000	47400	56600	23100	27900	40200	41800	9	16000	16000	9	9	9	C10160
664	pmf0318	159.1	118	4.1	158.08	[M+H]+	β-Nicotyrine	Alkaloids	2110000	1850000	2110000	712000	4480000	982000	367000	1190000	550000	1540000	1660000	1050000	1100000	2680000	8890000	298000	881000	427000	9	9	9	C10161
665	pmf0322	157.1	103	3.39	156.07	[M+H]+	2,3'-Bipyridine	Alkaloids	1220000	1190000	1320000	1180000	2890000	959000	2670000	3390000	2040000	1380000	1420000	898000	755000	576000	664000	183000	212000	207000	9	9	9	-
666	pmf0324	149.1	80	1.24	148.1	[M+H]+	Nornicotine	Alkaloids	298000	614000	562000	118000	293000	652000	178000	200000	107000	189000	566000	133000	551000	880000	903000	1220000	1310000	1420000	9	9	9	C06524
667	pmf0336	160	116	4.39	161.05	[M-H]-	Indole-3-carboxylic acid	Alkaloids	1100000	1140000	1130000	1570000	1820000	1940000	2900000	2630000	2960000	767000	1340000	785000	605000	274000	280000	90800	84400	84100	9	9	9	C19837
668	pmf0338	385.2	153	3.37	386.19	[M-H]-	Roseoside	Terpene	6300000	7180000	6000000	6100000	4640000	5630000	7950000	7750000	7170000	5010000	3710000	5040000	8550000	8380000	10300000	7730000	7260000	7510000	9	9	9	-
669	pmf0343	679.2	453.4	5.67	678.19	[M+H]+	α-Viniferin	Others	23000	27500	26300	29600	80000	35700	44700	45200	69900	35100	35200	37800	9	9	9	9	9	9	9	9	9	-
670	pmf0345	275.1	107	3.74	274.08	[M+H]+	(-)-Epiafzelechin	Polyphenol	611000	735000	723000	690000	518000	814000	648000	769000	668000	840000	859000	574000	666000	643000	761000	499000	516000	539000	9	9	9	C12128
671	pmf0346	213.1	122	6.34	214.1	[M-H]-	Dihydropinosylvin	Others	35400	31400	26700	18900	27200	8500	21500	37300	22400	9	9	9	23800	29700	68000	39000	54800	52400	9	9	9	C10254
672	pmf0348	187.1	97	4.43	188.14	[M-H]-	2,6-Dimethyl-7-octene-2,3,6-triol	Alcohols	7200000	7280000	7060000	13300000	9560000	13300000	9540000	7250000	11700000	9070000	10600000	6850000	3970000	3830000	3070000	1610000	1820000	2100000	9	9	9	-
673	pmf0349	223.1	161	3.97	224.14	[M-H]-	Vomifoliol	Others	84100	104000	123000	137000	195000	133000	158000	111000	169000	97500	140000	124000	41100	25600	46600	60700	55100	33900	9	9	9	C04166
674	pmf0353	287.3	97.2	10.31	286.29	[M+H]+	1,18-Octadecanediol	Lipids	4990000	3790000	4070000	3080000	2330000	3760000	2430000	2930000	1640000	6730000	6270000	3210000	5710000	4420000	4650000	3490000	3740000	3670000	9	9	9	-
675	pmf0360	449.1	151	3.97	450.12	[M-H]-	Astilbin	Flavonoid	454000	505000	512000	460000	391000	420000	726000	690000	658000	531000	449000	299000	504000	297000	499000	493000	340000	297000	9	9	9	C17449
676	pmf0363	301.1	258	6.28	300.06	[M+H]+	Hydroxygenkwanin	Flavonoid	43400	67700	54000	9	9	9	34700	81500	9	83900	64300	9	70500	98200	68400	56900	72900	65200	9	9	9	-
677	pmf0369	477.1	315	4.54	478.15	[M-H]-	Persicoside	Flavonoid	902000	864000	816000	687000	696000	895000	525000	524000	305000	1090000	848000	779000	747000	891000	1310000	1140000	1240000	1140000	9	9	9	-
678	pmf0372	317.1	302	4.72	316.06	[M+H]+	Pedalitin	Flavonoid	407000	396000	406000	200000	533000	304000	110000	225000	9	470000	280000	93700	411000	512000	509000	581000	564000	501000	9	9	9	C10119
679	pmf0373	187.1	132	6.77	186.08	[M+H]+	Caulilexin C	Alkaloids	127000	110000	138000	78400	125000	55200	63800	129000	52800	121000	90900	77700	184000	243000	191000	96200	210000	169000	9	9	9	-
680	pmf0374	477.1	314	4.19	478.11	[M-H]-	Isorhamnetin 3-O-glucoside	Flavonoid	1170000	1250000	1280000	1050000	1480000	1170000	1350000	2670000	582000	1270000	1160000	307000	801000	1080000	1190000	1230000	1210000	959000	9	9	9	-
681	pmf0382	343.1	313	6.81	344.09	[M-H]-	5,7-Dihydroxy-3',4',5'-trimethoxyflavone	Flavonoid	128000	127000	135000	74600	98700	55900	131000	181000	46100	186000	225000	73700	119000	153000	166000	103000	108000	115000	9	9	9	C19807
682	pmf0384	163.1	130	1.25	162.12	[M+H]+	Nicotine	Alkaloids	15200000	15800000	17700000	17800000	16300000	15300000	17800000	15900000	18900000	16000000	17100000	18000000	15600000	17800000	15100000	16000000	13300000	13500000	9	9	9	C00745
683	pmf0389	223.1	207	4.36	222.13	[M+H]+	Dehydrovomifoliol	Alcohols	4190000	4060000	4100000	15400000	4220000	6970000	5170000	5620000	5010000	3960000	2180000	10400000	9	9	9	9	9	9	9	9	9	-
684	pmf0392	315.1	178	7.15	316.09	[M-H]-	Persicogenin	Flavonoid	25200	30000	24000	107000	31600	52500	62300	46600	80200	6930	6090	6560	4360	9	9	9	9	9	9	9	9	-
685	pmf0399	309.3	227.3	10.72	310.29	[M-H]-	cis-Gondoic acid	Lipids	5240000	4420000	3890000	692000	550000	511000	1530000	2540000	2430000	2060000	2930000	2900000	6870000	5820000	7410000	3990000	3270000	3800000	9	9	9	C16526
686	pmf0402	367.4	285.4	10.84	368.37	[M-H]-	Lignoceric acid	Lipids	436000	348000	308000	431000	534000	510000	568000	433000	489000	504000	439000	513000	481000	413000	564000	746000	802000	664000	9	9	9	C08320
687	pmf0403	290.2	124	3.28	289.17	[M+H]+	L-Hyoscyamine	Alkaloids	535000	660000	629000	1430000	9	1240000	1150000	622000	1480000	670000	751000	1270000	9	9	9	9	9	9	9	9	9	C02046
688	pmf0404	177.1	130.9	7.89	176.08	[M+H]+	Ethyl cinnamate	Phenylpropanoids	773000	805000	696000	9	465000	420000	591000	469000	401000	787000	1070000	463000	700000	554000	640000	775000	677000	1050000	9	9	9	C06359
689	pmf0406	283.1	135	7.12	284.11	[M-H]-	Phenethyl caffeate	Phenylpropanoids	7500000	7470000	7120000	26600000	14300000	19600000	12700000	9010000	16000000	3500000	3790000	2270000	12400	8950	11700	17400	14800	19000	9	9	9	C10484
690	pmf0411	215.1	121	8.58	214.06	[M+H]+	Phenyl salicylate	Organic acids and derivatives	733000	698000	773000	748000	554000	464000	563000	738000	533000	867000	896000	802000	633000	617000	674000	676000	825000	796000	9	9	9	C14163
691	pmf0413	213.1	153	4.67	212.07	[M+H]+	Propyl gallate	Organic acids and derivatives	173000	154000	209000	9	123000	9	9	9	9	184000	199000	190000	467000	366000	378000	234000	239000	295000	9	9	9	C11155
692	pmf0419	285.1	121	2.65	286.11	[M-H]-	Salicin	Organic acids and derivatives	70400	83600	66000	70000	39400	100000	65300	71400	88800	64600	59100	92700	89700	78500	100000	72700	81200	99700	9	9	9	C01451
693	pmf0420	149	74.9	4.37	150.07	[M-H]-	Benzyl acetate	Organic acids and derivatives	133000	180000	131000	136000	9	56500	41900	14700	9	131000	29700	63600	9	9	9	69200	191000	31700	9	9	9	C15513
694	pmf0421	417.1	297	4.57	418.13	[M-H]-	Aloin A	Quinones	267000	274000	273000	159000	268000	259000	26600	44300	72800	157000	137000	180000	373000	373000	431000	395000	497000	501000	9	9	9	C10305
695	pmf0423	359.1	197	3.33	358.13	[M+H]+	Sweroside	Terpene	5910000	6380000	9960000	4810000	6430000	5190000	6550000	6850000	7460000	4540000	4460000	5870000	7470000	8680000	13400000	7320000	6410000	5750000	9	9	9	C17071
696	pmf0424	517.1	163.1	3.98	516.13	[M+H]+	Isochlorogenic acid B	Organic acids and derivatives	1160000	628000	527000	491000	1550000	1150000	9	9	9	1010000	1340000	938000	312000	399000	405000	1390000	1250000	1550000	9	9	9	-
697	pmf0425	149	87	0.84	150.02	[M-H]-	D-tartaric acid	Organic acids and derivatives	387000	358000	323000	362000	412000	371000	451000	273000	680000	278000	229000	321000	311000	334000	549000	167000	193000	159000	9	9	9	C02107
698	pmf0433	375.1	195.1	3.08	374.12	[M+H]+	Swertiamarin	Terpene	367000	261000	167000	212000	9	303000	9	9	241000	271000	118000	393000	379000	309000	300000	116000	141000	96400	9	9	9	C09800
699	pmf0435	391.2	179	3.25	390.15	[M+H]+	Loganin	Terpene	83000	126000	122000	9	9	9	9	113000	38800	9	64500	9	360000	357000	281000	183000	168000	181000	9	9	9	C01433
700	pmf0436	164.1	110.1	0.65	163.08	[M+H]+	1-Deoxynojirimycin	Alkaloids	48000	45800	55800	25500	26300	45300	29500	17900	32500	51400	29400	32900	50900	52900	46400	26800	36000	44200	9	9	9	C16843
701	pmf0440	163.1	91.1	6.04	162.07	[M+H]+	4-Methoxycinna Maldehyde	Phenylpropanoids	314000	266000	525000	1450000	582000	351000	488000	9	387000	442000	620000	514000	431000	391000	450000	584000	506000	402000	9	9	9	C10475
702	pmf0441	206.1	147.1	3.84	207.09	[M-H]-	N-Acetyl-L-phenylalanine	Amino acid and derivatives	18500000	19100000	18700000	11600000	56500000	20600000	15100000	11300000	20200000	26700000	36300000	12900000	6590000	9190000	9170000	5560000	7840000	8180000	9	9	9	C03519
703	pmf0455	432.3	415	3.4	431.34	[M+H]+	Peimine	Alkaloids	2850000	2790000	2740000	1710000	1010000	5950000	1200000	1440000	1900000	1480000	1380000	2750000	4310000	3480000	3120000	2230000	1710000	1740000	9	9	9	C10830
704	pmf0458	295.2	277	7.08	294.18	[M+H]+	6-Gingerol	Polyphenol	6900000	6540000	6650000	5580000	7550000	8360000	26000000	16100000	17500000	3850000	6490000	2120000	9	9	9	285000	302000	372000	9	9	9	C10462
705	pmf0464	301.1	181.3	6.67	300.1	[M+H]+	Farrerol	Flavonoid	247000	247000	245000	9	110000	124000	497000	467000	411000	262000	287000	9	180000	153000	243000	144000	192000	161000	9	9	9	C09734
706	pmf0465	387.1	122.9	3.26	388.14	[M-H]-	Geniposide	Terpene	187000	174000	195000	115000	139000	141000	167000	148000	173000	114000	123000	145000	299000	336000	397000	250000	256000	298000	9	9	9	C09781
707	pmf0466	310.1	280	3.38	311.15	[M-H]-	Leonurine hydrochloride	Alkaloids	20300	20300	21300	8340	12100	21700	18200	15500	12700	18800	22900	9480	33200	21300	21100	51300	41400	28000	9	9	9	C16985
708	pmf0468	429.1	267.1	2.84	406.15	[M+Na]+	Morroniside	Terpene	350000	641000	611000	9	9	9	9	9	9	9	9	9	803000	611000	884000	1600000	1210000	1370000	9	9	9	C17000
709	pmf0471	563.1	269.1	4.07	564.15	[M-H]-	Apiin	Flavonoid	613000	814000	800000	64000	83300	128000	9	9	9	227000	131000	49900	1290000	795000	2610000	934000	1230000	882000	9	9	9	C04858
710	pmf0474	373.1	123	2.15	374.12	[M-H]-	Geniposidic acid	Terpene	186000	167000	189000	106000	164000	165000	165000	249000	165000	131000	108000	122000	263000	279000	327000	124000	201000	161000	9	9	9	C11673
711	pmf0476	329.2	293	7.55	328.17	[M+H]+	Crocetin	Terpene	288000	319000	260000	9	9	9	9	9	9	275000	375000	9	384000	435000	437000	579000	582000	709000	9	9	9	C08588
712	pmf0477	529.4	403	10	528.38	[M+H]+	Pachymic acid	Terpene	110000	113000	108000	40900	17300	60700	33100	23200	21500	22400	37600	76800	187000	138000	202000	103000	777000	143000	9	9	9	C17044
713	pmf0478	549.2	225	2.94	550.19	[M-H]-	Genipin 1-gentiobioside	Terpene	26800	15800	22200	25600	45000	30100	23100	16000	17400	25500	30100	16400	11000	15200	12800	9370	23500	22400	9	9	9	C16965
714	pmf0479	217.1	202	6.07	216.04	[M+H]+	8-Methoxypsoralen	Phenylpropanoids	1460000	1470000	1440000	157000	749000	140000	292000	832000	269000	464000	422000	178000	2310000	2800000	4020000	2250000	2600000	2620000	9	9	9	C01864
715	pmf0482	515.1	191	3.13	516.13	[M-H]-	Cynarin	Organic acids and derivatives	22600000	22100000	21700000	8800000	16600000	9030000	9	4680000	9	13500000	10000000	8530000	45000000	51300000	57300000	53400000	54400000	49000000	9	9	9	C10445
716	pmf0485	503.2	179	0.8	504.17	[M-H]-	Panose	Carbohydrates	1330000	1300000	1180000	2660000	1560000	2680000	1870000	1360000	1770000	1960000	1630000	2730000	122000	128000	182000	257000	290000	212000	9	9	9	C00713
717	pmf0499	765.2	603.2	3.39	742.27	[M+Na]+	Eleutheroside E	Phenylpropanoids	8370000	7420000	7940000	4210000	7470000	6090000	3740000	4430000	3780000	9380000	10100000	6590000	10600000	8210000	7210000	14600000	11400000	10900000	9	9	9	C20786
718	pmf0500	306.2	182.2	7.51	305.2	[M+H]+	Capsaicin	Alkaloids	1130000	1110000	1090000	2310000	568000	780000	2830000	2230000	2140000	582000	672000	737000	1210000	1330000	1390000	598000	569000	736000	9	9	9	C06866
719	pmf0504	275.2	109	6.52	274.19	[M+H]+	Nandrolone	Others	5430000	5590000	5610000	4080000	14500000	5650000	2520000	7530000	2210000	2290000	4890000	1930000	5150000	5740000	7880000	6220000	11100000	8450000	9	9	9	C07254
720	pmf0506	191.1	173.4	8.26	190.1	[M+H]+	Ligustilide	Others	1120000	954000	856000	9	9	9	9	9	9	9	9	9	2480000	3090000	3310000	2660000	2550000	2840000	9	9	9	C16987
721	pmf0508	278	142	3.19	277.04	[M+H]+	Azathioprine	Nucleotide and derivates	108000	106000	124000	92200	140000	105000	135000	66500	94600	107000	101000	120000	153000	130000	179000	88700	130000	122000	9	9	9	C06837
722	pmf0509	153.2	71	12.43	152.12	[M+H]+	(-)-Camphor	Terpene	736000	942000	1050000	1030000	1070000	1160000	1090000	1040000	1080000	1080000	1100000	1160000	788000	848000	922000	954000	938000	1070000	9	9	9	C00809
723	pmf0511	585.4	371	11.29	584.42	[M+H]+	Capsanthin	Terpene	1170000	1420000	1030000	1080000	916000	1260000	927000	1200000	1280000	1190000	1400000	1140000	973000	1170000	1140000	1090000	1110000	1160000	9	9	9	C08584
724	pmf0514	219.2	111.2	9.4	218.17	[M+H]+	alpha-Cyperone	Others	767000	751000	732000	334000	964000	333000	453000	842000	303000	526000	704000	354000	1630000	1470000	1540000	521000	806000	634000	9	9	9	C17090
725	pmf0520	283	239	6.58	284.03	[M-H]-	Rhein	Quinones	147000	164000	159000	47600	9	44000	91400	83400	93100	574000	9	9	1120000	9	58100	57000	430000	79400	9	9	9	C10401
726	pmf0521	303	229	5.13	302.04	[M+H]+	Morin	Flavonoid	3090000	2680000	2630000	3210000	2450000	3280000	2010000	2070000	2260000	3640000	3280000	1740000	9	9	9	9	9	9	9	9	9	C10105
727	pmf0523	269	239.7	6.69	270.05	[M-H]-	Aloe emodin	Quinones	9420	8160	7230	3270	9	10100	10600	6140	4360	17400	9	9	35300	4640	5370	13200	36800	3800	9	9	9	C10294
728	pmf0526	271.1	147.2	8.49	270.09	[M+H]+	Isoimperatorin	Phenylpropanoids	1410000	1350000	1300000	1500000	598000	1590000	574000	448000	482000	2110000	2040000	1160000	1400000	1450000	1590000	1570000	1860000	1640000	9	9	9	C16976
729	pmf0528	191.1	148	0.85	190.11	[M+H]+	Cytisine	Alkaloids	185000	151000	169000	175000	136000	83600	359000	637000	223000	89700	132000	108000	101000	112000	115000	109000	79900	109000	9	9	9	C10763
730	pmf0529	221	191	4.25	222.05	[M-H]-	Isofraxidin	Phenylpropanoids	2230000	2190000	2230000	9280000	2320000	4060000	2890000	3010000	2620000	2260000	1230000	6010000	232000	202000	288000	169000	216000	223000	9	9	9	C17480
731	pmf0533	557.2	395	4.75	534.21	[M+Na]+	Phillyroside	Phenylpropanoids	946000	859000	974000	9	9	9	9	9	9	9	9	9	2910000	3320000	2650000	2380000	2150000	2570000	9	9	9	C17048
732	pmf0534	165.1	123	7.13	164.08	[M+H]+	Hinokitiol	Others	1270000	1290000	1330000	1270000	1480000	1370000	1100000	1270000	1960000	1400000	1170000	1760000	1280000	1240000	1240000	1780000	1570000	1460000	9	9	9	C09904
733	pmf0536	111	69	2.58	112.05	[M-H]-	Cyclohexane-1,3-dione	Others	187000	188000	176000	181000	188000	192000	187000	171000	209000	195000	206000	179000	88100	89000	151000	128000	145000	150000	9	9	9	C01066
734	pmf0541	287.1	155	4.87	288.1	[M-H]-	Shikonin	Quinones	177000	179000	168000	188000	156000	205000	166000	146000	179000	197000	218000	227000	127000	125000	112000	147000	137000	150000	9	9	9	C17412
735	pmf0544	623.3	592.4	3.79	622.3	[M+H]+	D-Tetrandrine	Alkaloids	157000	284000	187000	124000	518000	115000	153000	245000	49200	124000	232000	61500	122000	311000	296000	156000	429000	315000	9	9	9	C09654
736	pmf0546	269	225	7.96	270.05	[M-H]-	Emodin	Quinones	24800	28200	27900	77200	7500	39100	18200	8570	12900	32900	5740	8360	18400	11200	25000	24700	21000	5760	9	9	9	C10343
737	pmf0549	607.2	299	4.14	608.17	[M-H]-	Diosmin	Flavonoid	1370000	3520000	4400000	3910000	4940000	4310000	1880000	2070000	1980000	4400000	4770000	4290000	2580000	3080000	3180000	3420000	3250000	3990000	9	9	9	C10039
738	pmf0551	269.1	226	8.57	268.07	[M+H]+	Tectochrysin	Flavonoid	175000	143000	177000	9	191000	307000	116000	176000	136000	292000	277000	341000	9	9	9	9	9	9	9	9	9	C11621
739	pmf0555	285.1	211	9.53	284.07	[M+H]+	Parietin	Quinones	518000	426000	440000	9	9	327000	401000	471000	371000	343000	609000	354000	709000	9	9	620000	509000	553000	9	9	9	-
740	pmf0557	327	171	6.09	350.03	[M]-	Acid orange 20	Alkaloids	28100000	28000000	28000000	45200000	30400000	38700000	48900000	36500000	52700000	44600000	43000000	35100000	2820000	2370000	1600000	1130000	1320000	1490000	9	9	9	C19371
741	pmf0558	187	131	6	186.03	[M+H]+	Angelicin	Phenylpropanoids	14400000	14700000	14500000	1000000	5220000	902000	1200000	5300000	1050000	3220000	1910000	1320000	20600000	26800000	31800000	34900000	30400000	38100000	9	9	9	C09060
742	pmf0560	219.1	146	2.68	218.11	[M+H]+	Abrine	Alkaloids	895000	880000	942000	1510000	1080000	988000	1270000	931000	1260000	585000	851000	3350000	9	9	9	9	9	9	9	9	9	C02983
743	pmf0561	945.6	783.4	6	946.55	[M-H]-	Ginsenoside Rd	Terpene	171000	176000	176000	51500	217000	41600	262000	566000	82900	70400	73600	15300	79700	147000	231000	92800	167000	144000	9	9	9	C20725
744	pmf0562	265.1	245	8.46	266.13	[M-H]-	Magnolol	Phenylpropanoids	5720	4500	5240	9	3300	16000	1530	2130	9	1200	9	6180	4030	23700	9700	4480	3300	2940	9	9	9	C10651
745	pmf0571	217.1	105	5.29	216.06	[M+H]+	6-Aminopenicillanic acid	Others	8830000	9100000	8900000	3700000	11000000	3400000	10700000	20000000	7710000	7460000	6290000	3230000	9	9	11200000	9	6360000	5100000	9	9	9	C02954
746	pmf0577	197.1	123	4.12	196.07	[M+H]+	Cantharidin	Terpene	950000	950000	720000	9	9	9	9	9	9	9	9	9	1040000	1110000	1250000	993000	1070000	887000	9	9	9	C16778
747	pmf0578	191	111	1.18	192.03	[M-H]-	Citric acid monohydrate	Organic acids and derivatives	10400000	10600000	12400000	5750000	4810000	7730000	6640000	5040000	7430000	9100000	7890000	5080000	13400000	18200000	22700000	6380000	14800000	12000000	9	9	9	-
748	pmf0582	325.1	123	7.88	324.14	[M+H]+	Glabridin	Flavonoid	365000	399000	375000	499000	534000	262000	271000	279000	1070000	502000	453000	516000	9	9	9	9	9	9	9	9	9	C10421
749	pmf0583	435.1	167	4.36	436.14	[M-H]-	Phloridzin	Flavonoid	9260000	8950000	8710000	6870000	10600000	7920000	4340000	5900000	4150000	13100000	10700000	5880000	9380000	9520000	11500000	8060000	8060000	7150000	9	9	9	C01604
750	pmf0587	132	88	0.78	133.04	[M-H]-	Aspartic acid	Amino acid and derivatives	1470000	1380000	1470000	2660000	3370000	1880000	1420000	1360000	1080000	1830000	2170000	1070000	690000	1210000	1300000	1300000	1290000	1080000	9	9	9	C16433
751	pmf0589	146	102	0.76	147.05	[M-H]-	Glutamic acid	Amino acid and derivatives	2450000	2460000	2420000	1580000	2550000	1940000	783000	1040000	956000	1300000	1280000	1090000	2780000	3950000	5210000	4550000	5300000	3670000	9	9	9	-
752	pmf0592	283.3	247	7.96	282.33	[M+H]+	Artemisinin	Terpene	153000	179000	164000	324000	9	198000	543000	703000	327000	9	9	9	9	9	9	9	9	9	9	9	9	C09538
753	pmf0594	166.2	77	1.92	165.19	[M+H]+	D-(+)-Phenylalanine	Amino acid and derivatives	7430000	8960000	9120000	4110000	5440000	4160000	1200000	1090000	2130000	4620000	4250000	5540000	16200000	17500000	12200000	12800000	11000000	13700000	9	9	9	C02265
754	pmf0598	135.1	99.8	12.49	136.13	[M-H]-	(+)-alpha-Pinene	Terpene	2220000	2180000	2050000	2090000	2390000	1550000	2420000	2260000	2580000	1240000	2230000	2120000	3180000	3050000	1820000	1610000	1760000	1640000	9	9	9	C06306
755	pmf0601	255	227	7.18	256.04	[M-H]-	Purpurin	Quinones	35100	37700	29900	132000	42500	110000	33200	22600	55000	33900	37200	26600	9	9	9	9	9	9	9	9	9	C10395
756	pmf0604	205.2	149	9.69	204.19	[M+H]+	β-Caryophyllene	Terpene	3450000	3350000	3400000	1630000	1560000	2870000	2170000	1910000	2100000	3950000	3770000	3410000	3840000	3830000	3960000	3780000	4120000	3940000	9	9	9	C09629
757	pmf0605	355.1	102.8	8.45	354.15	[M+H]+	Notopterol	Phenylpropanoids	112000	102000	92800	97300	123000	103000	90600	60800	95600	72300	72900	91000	116000	118000	103000	116000	117000	108000	9	9	9	C17499
758	pmf0611	209.1	76.9	8.45	208.09	[M+H]+	Chalcone	Flavonoid	178000	144000	151000	214000	133000	268000	134000	9	134000	208000	174000	157000	9	9	9	9	9	9	9	9	9	C01484
759	pmf0612	286.1	171.2	7.42	285.14	[M+H]+	Piperine	Alkaloids	424000	497000	488000	9	167000	170000	217000	224000	118000	603000	773000	138000	718000	801000	774000	514000	523000	623000	9	9	9	C03882
760	pmf0613	155.1	114	12.35	154.14	[M+H]+	α-Terpineol	Terpene	31600000	35400000	34800000	33800000	34300000	34000000	36200000	35800000	36600000	34000000	33900000	36400000	32900000	33000000	34200000	33800000	35800000	35200000	9	9	9	C16772
761	pmf0615	641.4	317	2.08	641.4	Protonated	Petunidin 3, 5-diglucoside	Anthocyanins	95600	69300	98500	75500	309000	67400	55000	119000	9	89500	107000	9	9	9	69200	79300	81600	75300	9	9	9	-
762	pme1975	103	-	-	101.995	[M-H]-	Malonic acid	Organic acids	444580	560680	350390	9	9	9	9	9	9	9	9	9	9	9	9	9	9	9	679990	585690	273510	-
763	pme3017	104	-	-	103.056	[M+H]+	2-Aminoisobutyric acid	Amino acids and derivatives	179380	253560	198020	9	9	9	9	9	9	9	9	9	9	9	9	9	9	9	204300	179530	208310	C03665
764	pme3011	104.06	-	-	103.056	[M+H]+	γ-Aminobutyric acid	Organic acids	11844000	11512000	11698000	9	9	9	9	9	9	9	9	9	9	9	9	9	9	9	9727500	11969000	12362000	C00334
765	mws0574	103.05	-	-	104.041	[M-H]-	α-Hydroxyisobutyric acid	Organic acids	185160	216310	144860	9	9	9	9	9	9	9	9	9	9	9	9	9	9	9	149320	176540	204090	-
766	mws0576	103.05	-	-	104.041	[M-H]-	3-Hydroxybutyrate	Organic acids	452630	472810	335010	9	9	9	9	9	9	9	9	9	9	9	9	9	9	9	532750	535030	289450	-
767	mws0206	103.05	-	-	104.041	[M-H]-	(S)-2-Hydroxybutanoicacid	Organic acids	9972	12942	14656	9	9	9	9	9	9	9	9	9	9	9	9	9	9	9	15884	10771	8630.8	-
768	mws0255	112	-	-	111.038	[M+H]+	Cytosine	Nucleotides and derivatives	84020	88403	75639	9	9	9	9	9	9	9	9	9	9	9	9	9	9	9	56377	70108	78754	C00380
769	pme0006	116.1	-	-	115.056	[M+H]+	L-Proline	Amino acids and derivatives	1085200	1173500	1098200	9	9	9	9	9	9	9	9	9	9	9	9	9	9	9	983140	979550	972780	C00148
770	mws0376	115	-	-	116.006	[M-H]-	Fumaric acid	Organic acids	839580	1020500	966440	9	9	9	9	9	9	9	9	9	9	9	9	9	9	9	815080	1159000	782450	C00122
771	mws0823	115	-	-	116.041	[M-H]-	3-Methyl-2-Oxobutanoic acid	Organic acids	25456	41667	36623	9	9	9	9	9	9	9	9	9	9	9	9	9	9	9	40300	32956	30850	C00141
772	mws0256	118.1	-	-	117.07	[M+H]+	L-Valine	Amino acids and derivatives	366810	345740	328980	9	9	9	9	9	9	9	9	9	9	9	9	9	9	9	324890	411540	332910	C00183
773	pme0120	118.2	-	-	117.07	[M+H]+	5-Aminovaleric acid	Amino acids and derivatives	123520	112350	107860	9	9	9	9	9	9	9	9	9	9	9	9	9	9	9	109080	130790	90932	C00431
774	mws0470	117.02	-	-	118.021	[M-H]-	Methylmalonic acid	Organic acids	34134000	35547000	35290000	9	9	9	9	9	9	9	9	9	9	9	9	9	9	9	31013000	35175000	35867000	C02170
775	mws0192	117.03	-	-	118.021	[M-H]-	Succinic acid	Organic acids	31802000	32386000	34029000	9	9	9	9	9	9	9	9	9	9	9	9	9	9	9	28368000	32826000	34337000	C00042
776	mws0147	117.1	-	-	118.055	[M-H]-	3-Hydroxy-3-methyl butyric acid	Organic acids	74018	77244	76326	9	9	9	9	9	9	9	9	9	9	9	9	9	9	9	85195	81370	65567	-
777	mws0230	120	-	-	119.05	[M+H]+	L-(-)-Threonine	Amino acids and derivatives	173870	182520	160500	9	9	9	9	9	9	9	9	9	9	9	9	9	9	9	148880	136320	104820	C00188
778	pmp001287	120.08	-	-	119.067	[M+H]+	N-Benzylmethylene isomethylamine	Alkaloids	10610000	10167000	10575000	9	9	9	9	9	9	9	9	9	9	9	9	9	9	9	10287000	11434000	9228800	-
779	pmb0069	122	-	-	121	[M+H]+	Benzamide	Others	2704500	2718500	2793500	9	9	9	9	9	9	9	9	9	9	9	9	9	9	9	2212200	3508300	2288000	C09815
780	mws0628	121.04	-	-	122.032	[M-H]-	4-Hydroxybenzaldehyde	Phenolic acids	373260	383090	389000	9	9	9	9	9	9	9	9	9	9	9	9	9	9	9	404420	453720	299030	C00633
781	mws0133	123.1	-	-	122.043	[M+H]+	Nicotinamide	Others	66219	64402	75909	9	9	9	9	9	9	9	9	9	9	9	9	9	9	9	65896	69119	76452	C00153
782	pme1216	122.03	-	-	123.032	[M-H]-	2-Picolinic acid	Organic acids	96403	84867	110120	9	9	9	9	9	9	9	9	9	9	9	9	9	9	9	79097	95400	67519	C10164
783	pmb0302	126.1	-	-	125.1	[M+H]+	2-Aminoethylphosphonate	Lipids	14203	17280	20372	9	9	9	9	9	9	9	9	9	9	9	9	9	9	9	22965	27368	18873	C03557
784	mws0263	128.03	-	-	129.036	[M-H]-	L-PyroglutamicAcid	Amino acids and derivatives	7122.7	10451	7266.9	9	9	9	9	9	9	9	9	9	9	9	9	9	9	9	11234	11131	8875.7	-
785	Rfmb319	130.09	-	-	129.07	[M+H]+	Pipecolic acid	Amino acids and derivatives	56810	74618	64578	9	9	9	9	9	9	9	9	9	9	9	9	9	9	9	69203	59179	79315	-
786	mws0345	128.07	-	-	129.07	[M-H]-	Pipecolinic acid	Organic acids	9552.9	11224	5215.9	9	9	9	9	9	9	9	9	9	9	9	9	9	9	9	6121.3	10627	7213.6	-
787	mws0425	129	-	-	130.021	[M-H]-	Citraconic acid	Organic acids	104640	108130	132870	9	9	9	9	9	9	9	9	9	9	9	9	9	9	9	131240	119040	81437	C02226
788	mws1587	132.1	-	-	131.085	[M+H]+	α-Aminocaproic acid	Amino acids and derivatives	2801900	2924400	2645700	9	9	9	9	9	9	9	9	9	9	9	9	9	9	9	1491700	2823700	4239000	-
789	mws0227	132.1	-	-	131.085	[M+H]+	L-Leucine	Amino acids and derivatives	26467	40735	43248	9	9	9	9	9	9	9	9	9	9	9	9	9	9	9	25446	33254	35097	C00123
790	pme0274	132.09	-	-	131.085	[M+H]+	6-Aminocaproic acid	Organic acids	202450	225080	258490	9	9	9	9	9	9	9	9	9	9	9	9	9	9	9	141880	245690	209010	C02378
791	pmp001198	132.1	-	-	131.085	[M+H]+	6-Deoxyfagomine	Alkaloids	68752	75414	111470	9	9	9	9	9	9	9	9	9	9	9	9	9	9	9	58506	98336	76747	-
792	mws0258	132	-	-	131.085	[M+H]+	L-Isoleucine	Amino acids and derivatives	9468000	12151000	15275000	9	9	9	9	9	9	9	9	9	9	9	9	9	9	9	7528200	11134000	9896800	C00407
793	pme2679	132	-	-	131.095	[M+H]+	L-Allo-Isoleucine	Amino acids and derivatives	9596600	11192000	15294000	9	9	9	9	9	9	9	9	9	9	9	9	9	9	9	7084300	10344000	9846200	C21096
794	pma3649	132.1	-	-	131.1	[M+H]+	5-Aminolevulinate	Alkaloids	674640	784090	1008800	9	9	9	9	9	9	9	9	9	9	9	9	9	9	9	535980	781650	695950	C00430
795	mws0473	131.04	-	-	132.035	[M-H]-	2-Methylsuccinic acid	Organic acids	466730	485070	497580	9	9	9	9	9	9	9	9	9	9	9	9	9	9	9	471820	521910	439500	-
796	mws0972	131.08	-	-	132.07	[M-H]-	5-Hydroxyhexanoic acid	Organic acids	24842	31426	29453	9	9	9	9	9	9	9	9	9	9	9	9	9	9	9	17987	31060	25112	-
797	mws0341	131.08	-	-	132.07	[M-H]-	(S)-(-)-2-Hydroxyisocaproic acid	Organic acids	181940	224700	233180	9	9	9	9	9	9	9	9	9	9	9	9	9	9	9	198110	198810	215720	-
798	pmc0682	133.1	-	-	132.1	[M+H]+	4-Aminoindole	Alkaloids	42593	27984	29280	9	9	9	9	9	9	9	9	9	9	9	9	9	9	9	28044	37010	34315	-
799	mws0219	132	-	-	133.03	[M-H]-	L-AsparticAcid	Amino acids and derivatives	868130	891670	854900	9	9	9	9	9	9	9	9	9	9	9	9	9	9	9	840730	826860	919230	C00049
800	mws0275	133	-	-	134.015	[M-H]-	L-(-)-Malic acid	Organic acids	4674900	4418500	4607600	9	9	9	9	9	9	9	9	9	9	9	9	9	9	9	4901100	4455600	5223300	C00497
801	pme0057	136	-	-	135.028	[M+H]+	DL-Homocysteine	Amino acids and derivatives	18574	22908	21812	9	9	9	9	9	9	9	9	9	9	9	9	9	9	9	22300	24571	18659	C00155
802	pme0040	136.1	-	-	135.049	[M+H]+	Adenine	Nucleotides and derivatives	766140	509640	529950	9	9	9	9	9	9	9	9	9	9	9	9	9	9	9	532460	573070	507700	C00147
803	pme1173	137	-	-	136.033	[M+H]+	Allopurinol	Nucleotides and derivatives	6819.4	10130	7026.8	9	9	9	9	9	9	9	9	9	9	9	9	9	9	9	5558.7	8357.3	7567.1	-
804	pme0489	137	-	-	136.057	[M+H]+	N-Methylnicotinamide	Alkaloids	6649.7	6635.4	7120.4	9	9	9	9	9	9	9	9	9	9	9	9	9	9	9	11711	8348.7	6424.6	-
805	mws1336	138.05	-	-	137.042	[M+H]+	4-Aminobenzoic acid	Phenolic acids	29209	29049	29852	9	9	9	9	9	9	9	9	9	9	9	9	9	9	9	20850	28115	29261	C00568
806	pme1002	138.08	-	-	137.076	[M+H]+	L-Tyramine	Amino acids and derivatives	486390	488000	294230	9	9	9	9	9	9	9	9	9	9	9	9	9	9	9	510240	729510	319320	C00483
807	pma0948	138.09	-	-	137.091	[M+H]+	Hydroxyphenethylamine	Others	180570	203810	151910	9	9	9	9	9	9	9	9	9	9	9	9	9	9	9	157920	300310	124640	-
808	mws0749	137.03	-	-	138.026	[M-H]-	4-Hydroxybenzoic acid	Phenolic acids	201560	181730	176620	9	9	9	9	9	9	9	9	9	9	9	9	9	9	9	164590	179970	169090	C00156
809	Hmln001566	137.02	-	-	138.032	[M-H]-	Salicylic acid	Phenolic acids	173860	177370	167870	9	9	9	9	9	9	9	9	9	9	9	9	9	9	9	153340	182960	183640	C00805
810	Hmgn001653	137.02	-	-	138.032	[M-H]-	3,4-Dihydroxybenzaldehyde	Phenolic acids	85859	112700	103460	9	9	9	9	9	9	9	9	9	9	9	9	9	9	9	89003	113310	99434	-
811	mws2368	137.07	-	-	138.061	[M-H]-	Tyrosol	Phenolic acids	30776	31980	28655	9	9	9	9	9	9	9	9	9	9	9	9	9	9	9	35462	28319	20009	-
812	pma2987	142.1	-	-	141.09	[M+H]+	Histidinol	Others	12903000	13022000	13726000	9	9	9	9	9	9	9	9	9	9	9	9	9	9	9	12921000	11958000	12918000	C00860
813	Rfmb320	144.1	-	-	143.085	[M+H]+	1,2-N-Methylpipecolic acid	Amino acids and derivatives	3702500	3734800	3802100	9	9	9	9	9	9	9	9	9	9	9	9	9	9	9	3492900	3732900	3990400	-
814	mws0340	143	-	-	144.035	[M-H]-	2,3-Dimethylsuccinic acid	Amino acids and derivatives	6721	10959	9885.9	9	9	9	9	9	9	9	9	9	9	9	9	9	9	9	16695	8279.5	6562	-
815	pme0295	146.07	-	-	145.065	[M+H]+	4-Acetamidobutyric acid	Organic acids	47554	52028	49679	9	9	9	9	9	9	9	9	9	9	9	9	9	9	9	43204	38413	44947	C02946
816	mws0567	146.09	-	-	145.076	[M+H]+	4-Guanidinobutyric acid	Organic acids	119430	116110	128950	9	9	9	9	9	9	9	9	9	9	9	9	9	9	9	111390	106710	106980	C01035
817	mws0924	145.06	-	-	146.049	[M-H]-	2-Methylglutaric acid	Organic acids	269300	258730	259000	9	9	9	9	9	9	9	9	9	9	9	9	9	9	9	238990	296160	243000	-
818	mws0208	145.06	-	-	146.049	[M-H]-	Adipic Acid	Organic acids	232190	282990	305200	9	9	9	9	9	9	9	9	9	9	9	9	9	9	9	260190	310890	221290	C06104
819	pme0193	147.07	-	-	146.06	[M+H]+	L-Glutamine	Amino acids and derivatives	3342000	3607300	3757100	9	9	9	9	9	9	9	9	9	9	9	9	9	9	9	3375000	2872900	2700200	C00064
820	mws1372	147.1	-	-	146.077	[M+H]+	Myosmine	Alkaloids	78078	80476	87218	9	9	9	9	9	9	9	9	9	9	9	9	9	9	9	79080	74651	65004	C10160
821	mws1050	148.05	-	-	147.045	[M+H]+	O-Acetylserine	Amino acids and derivatives	32226	25179	17571	9	9	9	9	9	9	9	9	9	9	9	9	9	9	9	25418	24010	23495	C00979
822	pme0014	148.1	-	-	147.045	[M+H]+	L-Glutamic acid	Amino acids and derivatives	1307200	1480100	1468200	9	9	9	9	9	9	9	9	9	9	9	9	9	9	9	1225300	1076800	1075900	C00025
823	mws2213	147.05	-	-	148.046	[M-H]-	Cinnamic acid	Phenolic acids	8535.3	10956	11133	9	9	9	9	9	9	9	9	9	9	9	9	9	9	9	7410.8	10969	9891.2	C00423
824	mws1379	149.1	-	-	148.091	[M+H]+	Nornicotine	Alkaloids	2199500	2462400	2743400	9	9	9	9	9	9	9	9	9	9	9	9	9	9	9	2337500	2464100	2332500	C06524
825	mws0847	150	-	-	149.063	[M+H]+	1-Methyladenine	Nucleotides and derivatives	1150200	1257800	844080	9	9	9	9	9	9	9	9	9	9	9	9	9	9	9	1277900	1401000	1133300	C02216
826	mws0262	149	-	-	150.009	[M-H]-	L-(+)-Tartaric acid	Organic acids	32426	38247	50904	9	9	9	9	9	9	9	9	9	9	9	9	9	9	9	24006	31089	28459	-
827	mws1499	149.05	-	-	150.044	[M-H]-	D-(-)-Arabinose	Others	137140	133630	131990	9	9	9	9	9	9	9	9	9	9	9	9	9	9	9	172750	117600	143310	-
828	mws0008	149.07	-	-	150.061	[M-H]-	Hydrocinnamic acid	Phenolic acids	103100	107250	106230	9	9	9	9	9	9	9	9	9	9	9	9	9	9	9	95165	123600	98634	C05629
829	pme1109	152	-	-	151.043	[M+H]+	Guanine	Nucleotides and derivatives	34080	30476	19167	9	9	9	9	9	9	9	9	9	9	9	9	9	9	9	13893	30529	22786	C00242
830	pme0183	152.1	-	-	151.043	[M+H]+	2-Hydroxy-6-aminopurine	Nucleotides and derivatives	270370	286400	244980	9	9	9	9	9	9	9	9	9	9	9	9	9	9	9	254890	361300	227660	-
831	mws0458	151.05	-	-	152.041	[M-H]-	Vanillin	Phenolic acids	51758	51760	42347	9	9	9	9	9	9	9	9	9	9	9	9	9	9	9	45279	47772	34729	C00755
832	mws0182	151	-	-	152.041	[M-H]-	p-Hydroxyphenyl acetic acid	Phenolic acids	7773.8	6019.2	7761.8	9	9	9	9	9	9	9	9	9	9	9	9	9	9	9	5641.6	3168.4	7646	C00642
833	mws0213	151	-	-	152.058	[M-H]-	Ribitol	Others	9866.9	12213	14104	9	9	9	9	9	9	9	9	9	9	9	9	9	9	9	13174	12590	7957.6	-
834	mws0437	151.15	-	-	152.058	[M-H]-	D-Arabitol	Others	7812.4	8069.1	9587.6	9	9	9	9	9	9	9	9	9	9	9	9	9	9	9	9664.6	8856.1	10110	C01904
835	mws0885	153	-	-	154.021	[M-H]-	2,4-Dihydroxy benzoic acid	Phenolic acids	158930	182480	144750	9	9	9	9	9	9	9	9	9	9	9	9	9	9	9	178690	188830	147060	-
836	mws0639	153.2	-	-	154.021	[M-H]-	2,3-Dihydroxybenzoic Acid	Organic acids	157720	182320	174610	9	9	9	9	9	9	9	9	9	9	9	9	9	9	9	181980	173510	177590	C00196
837	mws0180	153	-	-	154.021	[M-H]-	2,5-Dihydroxybenzoic acid	Phenolic acids	61671	58551	51469	9	9	9	9	9	9	9	9	9	9	9	9	9	9	9	56706	51333	49460	C00628
838	mws0254	156.1	-	-	155.061	[M+H]+	L-Histidine	Amino acids and derivatives	15173000	14788000	15173000	9	9	9	9	9	9	9	9	9	9	9	9	9	9	9	16433000	15539000	14651000	C00135
839	pmb0819	157	-	-	156.069	[M+H]+	3-Indoleacetonitrile	Alkaloids	134620	133230	156960	9	9	9	9	9	9	9	9	9	9	9	9	9	9	9	132520	134300	84011	C02938
840	pmp001196	160.1	-	-	159.079	[M+H]+	Calystegine A3	Alkaloids	26819	37273	35806	9	9	9	9	9	9	9	9	9	9	9	9	9	9	9	31006	26265	28704	-
841	mws1371	161.11	-	-	160.091	[M+H]+	Anatabine	Alkaloids	108370000	89996000	67447000	9	9	9	9	9	9	9	9	9	9	9	9	9	9	9	99984000	102750000	80742000	C10126
842	Lmyp000875	161.11	-	-	160.1	[M+H]+	Dehydroanabasine	Alkaloids	3813600	3780300	5355800	9	9	9	9	9	9	9	9	9	9	9	9	9	9	9	4806900	3714700	2970100	-
843	mws1550	162.1	-	-	161.042	[M+H]+	S-Allyl-L-cysteine	Amino acids and derivatives	15708	14867	9186	9	9	9	9	9	9	9	9	9	9	9	9	9	9	9	21512	18700	12158	C16759
844	pmb0449	162.1	-	-	161.1	[M+H]+	2-Aminoadipic acid (L-Homoglutamic acid)	Amino acids and derivatives	1061900	1037700	975590	9	9	9	9	9	9	9	9	9	9	9	9	9	9	9	1142700	961550	846280	C00956
845	mws1478	163.12	-	-	162.106	[M+H]+	Nicotine	Alkaloids	12904000	9831100	12736000	9	9	9	9	9	9	9	9	9	9	9	9	9	9	9	22022000	21931000	14017000	C00745
846	YC512111	163.12	-	-	162.106	[M+H]+	Anabasine	Alkaloids	1099200	989600	964560	9	9	9	9	9	9	9	9	9	9	9	9	9	9	9	1142400	1070400	805010	C06180
847	mws0159	163.05	-	-	164.041	[M-H]-	Phenylpyruvic acid	Organic acids	104430	87977	92036	9	9	9	9	9	9	9	9	9	9	9	9	9	9	9	73790	135070	106090	-
848	pmn001680	163.04	-	-	164.041	[M-H]-	Coumaric acid	Phenolic acids	7691.5	11673	9756.9	9	9	9	9	9	9	9	9	9	9	9	9	9	9	9	8387.7	11281	10603	-
849	pme1439	165.05	-	-	164.041	[M+H]+	p-Coumaric acid	Phenolic acids	35942	27534	32770	9	9	9	9	9	9	9	9	9	9	9	9	9	9	9	43724	39193	32435	C00811
850	pme0021	166	-	-	165.07	[M+H]+	L-Phenylalanine	Amino acids and derivatives	1021200	1017700	1061400	9	9	9	9	9	9	9	9	9	9	9	9	9	9	9	1024400	1128800	865560	C00079
851	mws0344	165.05	-	-	166.038	[M-H]-	D-Xylonic acid	Organic acids	1355900	1483200	1583200	9	9	9	9	9	9	9	9	9	9	9	9	9	9	9	1640800	1375100	1483400	-
852	pme1266	167.1	-	-	166.042	[M+H]+	3-Methylxanthine	Nucleotides and derivatives	23066	23716	26300	9	9	9	9	9	9	9	9	9	9	9	9	9	9	9	28693	24046	28773	C16357
853	mws0467	165.06	-	-	166.055	[M-H]-	3-(4-Hydroxyphenyl)-propionic acid	Phenolic acids	26254	35582	39518	9	9	9	9	9	9	9	9	9	9	9	9	9	9	9	39186	30177	43321	C01744
854	mws0028	167	-	-	168.035	[M-H]-	Vanillic acid	Phenolic acids	19292	21144	21270	9	9	9	9	9	9	9	9	9	9	9	9	9	9	9	21226	19706	21944	C06672
855	pme1383	170.1	-	-	169.065	[M+H]+	Pyridoxine	Others	32148	25082	41196	9	9	9	9	9	9	9	9	9	9	9	9	9	9	9	45031	39325	49222	C00314
856	pme0181	170.1	-	-	169.076	[M+H]+	1-Methylhistidine	Amino acids and derivatives	89987	139600	107940	9	9	9	9	9	9	9	9	9	9	9	9	9	9	9	103290	95832	100940	C01152
857	mws0279	170	-	-	169.076	[M+H]+	3-N-Methyl-L-histidine	Amino acids and derivatives	17741	12410	10924	9	9	9	9	9	9	9	9	9	9	9	9	9	9	9	18047	9536.1	5807.4	-
858	pme0124	173.2	-	-	172.075	[M+H]+	Glycyl-L-proline	Amino acids and derivatives	218490	215490	175410	9	9	9	9	9	9	9	9	9	9	9	9	9	9	9	242170	244910	219370	-
859	pmp001197	174.1	-	-	173.094	[M+H]+	Calystegine	Alkaloids	16310	14196	10291	9	9	9	9	9	9	9	9	9	9	9	9	9	9	9	14331	7828.1	14668	-
860	pme0253	174.1	-	-	173.094	[M+H]+	N-Acetyl-L-leucine	Amino acids and derivatives	26558	23523	16714	9	9	9	9	9	9	9	9	9	9	9	9	9	9	9	36325	25839	29243	C02710
861	mws0242	173.1	-	-	174.078	[M-H]-	SubericAcid	Organic acids	20360	23431	27134	9	9	9	9	9	9	9	9	9	9	9	9	9	9	9	24673	28643	28946	C08278
862	mws0260	175	-	-	174.1	[M+H]+	L-(+)-Arginine	Amino acids and derivatives	3046500	3731600	3253600	9	9	9	9	9	9	9	9	9	9	9	9	9	9	9	2317300	3195900	2430000	C00062
863	pme2559	174	-	-	175.039	[M-H]-	N-Acetylaspartate	Amino acids and derivatives	92227	84155	76978	9	9	9	9	9	9	9	9	9	9	9	9	9	9	9	71302	103320	94243	C01042
864	pmb0312	176.1	-	-	175.063	[M+H]+	5-methoxyindole-3-carbaldehyde	Alkaloids	15694	20618	15446	9	9	9	9	9	9	9	9	9	9	9	9	9	9	9	13983	19193	26427	-
865	pmb0813	176.1	-	-	175.063	[M+H]+	1-Methoxyindole-3-carbaldehyde	Alkaloids	8268	5193.8	7317.3	9	9	9	9	9	9	9	9	9	9	9	9	9	9	9	10015	11364	7762.3	-
866	pmp001194	176.1	-	-	175.074	[M+H]+	Calystegine B2	Alkaloids	236890	170240	171150	9	9	9	9	9	9	9	9	9	9	9	9	9	9	9	132060	160580	199190	-
867	mws1074	177.03	-	-	178.021	[M-H]-	Daphnetin	Lignans and Coumarins	1743700	1920600	1593800	9	9	9	9	9	9	9	9	9	9	9	9	9	9	9	1900700	2412100	1721500	C03093
868	mws1013	177	-	-	178.021	[M-H]-	Esculetin	Lignans and Coumarins	154100	168370	158770	9	9	9	9	9	9	9	9	9	9	9	9	9	9	9	152530	172420	129490	C09263
869	mws1195	179.1	-	-	178.055	[M+H]+	Methyl p-coumarate	Phenolic acids	9006.3	7952.8	7104.8	9	9	9	9	9	9	9	9	9	9	9	9	9	9	9	12596	8256	14724	-
870	mws1200	177	-	-	178.055	[M-H]-	Trans-4-Hydroxycinnamic Acid Methyl Ester	Phenolic acids	26951	30227	28506	9	9	9	9	9	9	9	9	9	9	9	9	9	9	9	34279	20926	29526	-
871	Lmyp001138	179.12	-	-	178.111	[M+H]+	Nicotine-1'-N-oxide	Alkaloids	33301000	33212000	37801000	9	9	9	9	9	9	9	9	9	9	9	9	9	9	9	41484000	31037000	24844000	-
872	mws2212	179.04	-	-	180.035	[M-H]-	Caffeic acid	Phenolic acids	1557000	1572100	1474700	9	9	9	9	9	9	9	9	9	9	9	9	9	9	9	1628600	1659800	1481900	C01197
873	pmn001682	179.03	-	-	180.035	[M-H]-	Sorbic acid	Phenolic acids	1266000	1294700	1304800	9	9	9	9	9	9	9	9	9	9	9	9	9	9	9	1150100	1447700	1258500	-
874	mws4170	179.06	-	-	180.053	[M-H]-	D-Glucose	Others	8445700	7695800	8418800	9	9	9	9	9	9	9	9	9	9	9	9	9	9	9	10062000	6199400	9636900	-
875	mws0250	182.1	-	-	181.065	[M+H]+	L-(-)-Tyrosine	Amino acids and derivatives	41471000	42983000	38032000	9	9	9	9	9	9	9	9	9	9	9	9	9	9	9	31799000	55230000	43675000	C00082
876	mws1350	181.06	-	-	182.049	[M-H]-	Syringic Aldehyde	Phenolic acids	19234	26463	24948	9	9	9	9	9	9	9	9	9	9	9	9	9	9	9	26284	26563	21379	-
877	mws0214	181	-	-	182.067	[M-H]-	D-Sorbitol	Others	30037	40388	36917	9	9	9	9	9	9	9	9	9	9	9	9	9	9	9	46787	27998	39275	C00794
878	Lmyn000239	181.07	-	-	182.079	[M-H]-	Cordycepic acid	Others	72122	86929	87126	9	9	9	9	9	9	9	9	9	9	9	9	9	9	9	93970	64799	85046	C00392
879	pme2596	184.05	-	-	183.045	[M+H]+	4-Pyridoxic acid	Others	81900	66852	70315	9	9	9	9	9	9	9	9	9	9	9	9	9	9	9	69750	61115	53783	C00847
880	pme2602	184.1	-	-	185	[M-H]-	O-Phospho-L-serine	Amino acids and derivatives	8487.3	11763	10305	9	9	9	9	9	9	9	9	9	9	9	9	9	9	9	6282.5	12641	9906.7	C01005
881	mws0752	185.16	-	-	186.147	[M-H]-	Undecylic Acid	Lipids	630490	733270	773040	9	9	9	9	9	9	9	9	9	9	9	9	9	9	9	533870	561920	517760	-
882	pmn001492	187.1	-	-	188.041	[M-H]-	Ayapin	Lignans and Coumarins	101630	106260	104410	9	9	9	9	9	9	9	9	9	9	9	9	9	9	9	84558	124070	99066	C18078
883	pme0137	187.2	-	-	188.069	[M-H]-	N-α-Acetyl-L-glutamine	Amino acids and derivatives	187440	168030	187050	9	9	9	9	9	9	9	9	9	9	9	9	9	9	9	206440	201860	173110	-
884	Hmmp001310	188.07	-	-	188.071	[M+H]+	3-Indoleacrylic acid	Alkaloids	9010400	7121400	7247600	9	9	9	9	9	9	9	9	9	9	9	9	9	9	9	9410800	10010000	8314500	-
885	mws0237	187.1	-	-	188.093	[M-H]-	Anchoic Acid	Organic acids	1902400	1887800	1882700	9	9	9	9	9	9	9	9	9	9	9	9	9	9	9	1510600	2094500	1848000	C08261
886	pme0122	189.2	-	-	188.103	[M+H]+	N6-Acetyl-L-lysine	Amino acids and derivatives	195730	150880	146120	9	9	9	9	9	9	9	9	9	9	9	9	9	9	9	173840	188120	192550	C02727
887	mws0736	189.1	-	-	188.103	[M+H]+	N-Glycyl-L-leucine	Amino acids and derivatives	163780	136400	144280	9	9	9	9	9	9	9	9	9	9	9	9	9	9	9	129880	179830	152300	C02155
888	mws5041	189.12	-	-	188.103	[M+H]+	Glycylisoleucine	Amino acids and derivatives	9328.9	6178.5	9285.7	9	9	9	9	9	9	9	9	9	9	9	9	9	9	9	8649.2	11265	6914.4	-
889	pme3388	189	-	-	188.114	[M+H]+	H-HomoArg-OH	Amino acids and derivatives	53423	60464	65503	9	9	9	9	9	9	9	9	9	9	9	9	9	9	9	46589	51614	47828	C01924
890	mws0193	190.1	-	-	189.099	[M+H]+	L-Homocitrulline	Amino acids and derivatives	153980	91123	132450	9	9	9	9	9	9	9	9	9	9	9	9	9	9	9	140130	113010	130370	C02427
891	pme0278	191.09	-	-	190.083	[M+H]+	2,6-Diaminooimelic acid	Amino acids and derivatives	33651	31782	16390	9	9	9	9	9	9	9	9	9	9	9	9	9	9	9	26800	41227	48294	C00666
892	mws0281	191	-	-	192.018	[M-H]-	Citric Acid	Organic acids	13292000	15538000	12494000	9	9	9	9	9	9	9	9	9	9	9	9	9	9	9	18380000	13144000	12326000	C00158
893	Hmjp002337	193.04	-	-	192.033	[M+H]+	Isoscopoletin (6-Hydroxy-7-Methoxycoumarin)	Lignans and Coumarins	7568200	4068800	4590200	9	9	9	9	9	9	9	9	9	9	9	9	9	9	9	7202400	5252400	6177800	-
894	pme2993	193.1	-	-	192.035	[M+H]+	Scopoletin(7-Hydroxy-5-methoxycoumarin)	Lignans and Coumarins	2712900	2186200	2137000	9	9	9	9	9	9	9	9	9	9	9	9	9	9	9	2964000	2769700	2716700	C01752
895	Hmdp002169	193.05	-	-	192.043	[M+H]+	6-Hydroxy-7-methoxy-coumarin	Lignans and Coumarins	2754200	1979000	1992500	9	9	9	9	9	9	9	9	9	9	9	9	9	9	9	3259800	2566200	2509800	-
896	mws0277	191	-	-	192.053	[M-H]-	Kinic acid	Organic acids	16425000	22781000	15180000	9	9	9	9	9	9	9	9	9	9	9	9	9	9	9	23001000	19848000	17581000	C00296
897	YC512116	193.1	-	-	192.08	[M+H]+	Trans-3'-hydroxycotinine	Alkaloids	6105.6	4782.7	5965.1	9	9	9	9	9	9	9	9	9	9	9	9	9	9	9	6637.2	5760.3	5405	-
898	mws1189	193.1	-	-	194.033	[M-H]-	D-Galacturonic acid(Gal A)	Organic acids	200000	193640	188600	9	9	9	9	9	9	9	9	9	9	9	9	9	9	9	163770	158040	185440	C00333
899	mws0014	193.06	-	-	194.049	[M-H]-	Ferulic acid	Phenolic acids	51061	59371	45811	9	9	9	9	9	9	9	9	9	9	9	9	9	9	9	55188	51098	41937	C01494
900	Lmyp008093	195.17	-	-	194.167	[M+H]+	Solanone	Others	10490	8292.5	8275	9	9	9	9	9	9	9	9	9	9	9	9	9	9	9	9006.4	10199	5583.4	-
901	pme3827	198.2	-	-	197.059	[M+H]+	3,4-Dihydroxy-phenylalanine	Amino acids and derivatives	1493600	1445200	1428200	9	9	9	9	9	9	9	9	9	9	9	9	9	9	9	1753600	1663000	1433400	C00355
902	pmb2497	197	-	-	198.053	[M-H]-	4-Hydroxy-3-methoxymandelate	Phenolic acids	7059.3	11605	11850	9	9	9	9	9	9	9	9	9	9	9	9	9	9	9	10007	12128	9199.5	C05584
903	pme1419	164	-	-	199.032	[M-Cl]+	L-Methionine methyl ester	Amino acids and derivatives	51734	54471	46823	9	9	9	9	9	9	9	9	9	9	9	9	9	9	9	61385	73089	53775	-
904	mws0923	200.05	-	-	199.032	[M+H]+	L-2-chlorophenylalanine	Amino acids and derivatives	5276600	4294600	4290800	9	9	9	9	9	9	9	9	9	9	9	9	9	9	9	5428600	5450300	5855400	-
905	mws0282	203	-	-	204.08	[M-H]-	L-Tryptophan	Amino acids and derivatives	26548000	28370000	28981000	9	9	9	9	9	9	9	9	9	9	9	9	9	9	9	27525000	29448000	26158000	C00078
906	mws1014	209.2	-	-	208.029	[M+H]+	Fraxetin	Lignans and Coumarins	116280	80721	83339	9	9	9	9	9	9	9	9	9	9	9	9	9	9	9	140430	98995	75910	C09265
907	mws1212	209.1	-	-	208.064	[M+H]+	Methyl ferulate	Phenolic acids	14828	14181	16881	9	9	9	9	9	9	9	9	9	9	9	9	9	9	9	18846	16295	17755	-
908	mws0853	209	-	-	210.078	[M-H]-	Sinapyl alcohol	Phenolic acids	7594.7	6833.6	8717.1	9	9	9	9	9	9	9	9	9	9	9	9	9	9	9	5412.6	9847.5	14094	C02325
909	pme0170	217.1	-	-	216.108	[M+H]+	N-α-Acetyl-L-arginine	Amino acids and derivatives	151900	129870	149500	9	9	9	9	9	9	9	9	9	9	9	9	9	9	9	185390	192520	131960	-
910	mws1337	220.2	-	-	219.097	[M+H]+	D-Pantothenic Acid	Others	7011700	5671900	5955300	9	9	9	9	9	9	9	9	9	9	9	9	9	9	9	7331100	7565400	6034400	C00864
911	pmp000284	223.06	-	-	222.044	[M+H]+	Fraxidin	Lignans and Coumarins	15914	10793	8883.6	9	9	9	9	9	9	9	9	9	9	9	9	9	9	9	11139	11432	8629	C17479
912	mws1639	223.06	-	-	222.044	[M+H]+	Isofraxidin	Lignans and Coumarins	38259	32138	36006	9	9	9	9	9	9	9	9	9	9	9	9	9	9	9	40072	36820	30351	C17480
913	mws5042	223.11	-	-	222.089	[M+H]+	Glycylphenylalanine	Amino acids and derivatives	369710	332230	328010	9	9	9	9	9	9	9	9	9	9	9	9	9	9	9	342600	481360	312710	-
914	mws0520	224.1	-	-	223.074	[M+H]+	N-Acetyl-L-tyrosine	Amino acids and derivatives	181470	158170	167220	9	9	9	9	9	9	9	9	9	9	9	9	9	9	9	177270	230600	180180	-
915	mws4085	223.07	-	-	224.058	[M-H]-	Sinapic acid	Phenolic acids	12987	14020	8810.5	9	9	9	9	9	9	9	9	9	9	9	9	9	9	9	10138	14557	15574	C00482
916	pme1194	228	-	-	227.079	[M+H]+	Deoxycytidine	Nucleotides and derivatives	11728	13138	7078.6	9	9	9	9	9	9	9	9	9	9	9	9	9	9	9	9514.8	10464	19582	C00881
917	mws0119	227.2	-	-	228.19	[M-H]-	Myristic Acid	Lipids	10113000	10082000	9958500	9	9	9	9	9	9	9	9	9	9	9	9	9	9	9	10759000	12472000	10220000	-
918	Lmyp006706	233.15	-	-	232.146	[M+H]+	Nicosesquiterpene A	Terpenoids	76524	96666	51456	9	9	9	9	9	9	9	9	9	9	9	9	9	9	9	76993	66612	122880	-
919	mws0863	213	-	-	234.988	[M-Na]-	2-Deoxyribose 5-phosphate	Nucleotides and derivatives	19587	15354	16677	9	9	9	9	9	9	9	9	9	9	9	9	9	9	9	19529	13539	5890.4	-
920	mws4176	237.12	-	-	236.103	[M+H]+	Alanylphenylalanine	Amino acids and derivatives	180520	115650	145960	9	9	9	9	9	9	9	9	9	9	9	9	9	9	9	182610	215420	122460	-
921	HmLp007639	237.18	-	-	236.178	[M+H]+	Capsidiol	Terpenoids	22711	20417	23998	9	9	9	9	9	9	9	9	9	9	9	9	9	9	9	21805	16884	23169	-
922	mws0984	236.1	-	-	237.075	[M-H]-	Sepiapterin(L-SEPIAPTERIN)COFACTOR OF NITRIC OX	Nucleotides and derivatives	15388	15796	13740	9	9	9	9	9	9	9	9	9	9	9	9	9	9	9	16575	17186	11175	-
923	Lmhn003240	237.04	-	-	238.048	[M-H]-	Benzoylmalic acid	Phenolic acids	44119	52874	56903	9	9	9	9	9	9	9	9	9	9	9	9	9	9	9	65844	54087	52093	-
924	pmn001669	237.1	-	-	238.073	[M-H]-	Methyl sinapate	Phenolic acids	11408	14009	12414	9	9	9	9	9	9	9	9	9	9	9	9	9	9	9	12157	11261	14143	-
925	mws0221	241	-	-	240.012	[M+H]+	L-(-)-Cystine	Amino acids and derivatives	65162	77318	65690	9	9	9	9	9	9	9	9	9	9	9	9	9	9	9	76375	56029	90381	C00491
926	pme0264	243.09	-	-	242.078	[M+H]+	Thymidine	Nucleotides and derivatives	38930	37386	34965	9	9	9	9	9	9	9	9	9	9	9	9	9	9	9	28296	32801	60162	C00214
927	mws0359	241.22	-	-	242.205	[M-H]-	Pentadecanoic Acid	Lipids	41011	41223	36886	9	9	9	9	9	9	9	9	9	9	9	9	9	9	9	40292	49723	45049	-
928	pme3732	244.09	-	-	243.073	[M+H]+	Cytidine	Nucleotides and derivatives	775720	768570	676540	9	9	9	9	9	9	9	9	9	9	9	9	9	9	9	688230	878210	866000	C00475
929	mws0248	243.1	-	-	244.058	[M-H]-	Uridine	Nucleotides and derivatives	224910	190740	254000	9	9	9	9	9	9	9	9	9	9	9	9	9	9	9	178240	212590	226460	C00299
930	mws0976	243	-	-	244.058	[M-H]-	β-Pseudouridine	Nucleotides and derivatives	36440	33457	27104	9	9	9	9	9	9	9	9	9	9	9	9	9	9	9	28255	32998	25708	C02067
931	pme2266	245.09	-	-	244.075	[M+H]+	Biotin	Others	155610	142480	145870	9	9	9	9	9	9	9	9	9	9	9	9	9	9	9	128560	224590	147160	C00120
932	mws0124	247.1	-	-	246.089	[M+H]+	N-(3-Indolylacetyl)-L-alanine	Amino acids and derivatives	11295	6784.6	10557	9	9	9	9	9	9	9	9	9	9	9	9	9	9	9	14221	10613	7678.9	-
933	mws0361	253.22	-	-	254.205	[M-H]-	Palmitoleic Acid	Lipids	5319.8	4428.5	5973.2	9	9	9	9	9	9	9	9	9	9	9	9	9	9	9	3360.1	5516.3	6708.4	C08362
934	pmn001578	255.23	-	-	256.219	[M-H]-	Hexadecanoic acid	Lipids	12465000	13706000	14371000	9	9	9	9	9	9	9	9	9	9	9	9	9	9	9	16005000	16960000	16361000	C00249
935	mws0120	258.11	-	-	257.103	[M+H]+	Choline alfoscerate	Lipids	33888	37078	34605	9	9	9	9	9	9	9	9	9	9	9	9	9	9	9	42331	33697	40840	-
936	mws0866	259	-	-	260.016	[M-H]-	D-Glucose 6-phosphate	Others	2550600	2635700	2378100	9	9	9	9	9	9	9	9	9	9	9	9	9	9	9	2394200	2472400	2445900	C00092
937	mws1090	259	-	-	260.016	[M-H]-	Glucose-1-phosphate	Others	2932300	2854400	2695000	9	9	9	9	9	9	9	9	9	9	9	9	9	9	9	2408400	2707000	2732800	-
938	mws0715	263.1	-	-	264.098	[M-H]-	Phenylacetyl-L-glutamine	Amino acids and derivatives	35015	43014	36138	9	9	9	9	9	9	9	9	9	9	9	9	9	9	9	44958	39395	36558	C04148
939	pme1184	268.1	-	-	267.084	[M+H]+	Deoxyguanosine	Nucleotides and derivatives	90877	86655	82033	9	9	9	9	9	9	9	9	9	9	9	9	9	9	9	76718	84110	110300	C00330
940	pme0230	268.1	-	-	267.084	[M+H]+	Adenosine	Nucleotides and derivatives	7036600	6625000	7013500	9	9	9	9	9	9	9	9	9	9	9	9	9	9	9	7696800	5097600	7257000	C00212
941	mws1060	267.08	-	-	268.068	[M-H]-	9-(β-D-Arabinofuranosyl)hypoxanthine	Nucleotides and derivatives	483440	524890	520020	9	9	9	9	9	9	9	9	9	9	9	9	9	9	9	538620	464060	454980	-
942	pmp000086	269.1	-	-	268.081	[M+H]+	1-Feruloyl-sn-glycerol	Phenolic acids	30622	32085	28478	9	9	9	9	9	9	9	9	9	9	9	9	9	9	9	27221	71045	39641	-
943	mws0383	267.23	-	-	268.219	[M-H]-	Cis-10-Heptadecenoic Acid	Lipids	105470	125410	126730	9	9	9	9	9	9	9	9	9	9	9	9	9	9	9	99551	149460	160300	-
944	mws1297	269.1	-	-	270.096	[M-H]-	Benzyl β-D-Glucopyranoside	Phenolic acids	5333.3	9816	9850.8	9	9	9	9	9	9	9	9	9	9	9	9	9	9	9	7690.9	6508.6	4800.2	-
945	pme3472	271.09	-	-	272.09	[M-H]-	Arbutin	Others	288300	303680	376940	9	9	9	9	9	9	9	9	9	9	9	9	9	9	9	267620	308060	300510	C06186
946	pmp001264	274.28	-	-	273.243	[M+H]+	Hexadecylsphingosine	Lipids	1331900	1281900	1302100	9	9	9	9	9	9	9	9	9	9	9	9	9	9	9	1664500	2028500	1777000	-
947	pme1712	275	-	-	276.132	[M-H]-	L-Saccharopine	Amino acids and derivatives	320810	313670	303300	9	9	9	9	9	9	9	9	9	9	9	9	9	9	9	320710	380180	305500	C00449
948	mws1038	277.13	-	-	278.112	[M-H]-	(R)-Pantetheine	Others	11985	11871	4150	9	9	9	9	9	9	9	9	9	9	9	9	9	9	9	12812	13572	8318.5	C00831
949	mws5035	279.17	-	-	278.147	[M+H]+	Leucylphenylalanine	Amino acids and derivatives	602720	523820	563710	9	9	9	9	9	9	9	9	9	9	9	9	9	9	9	561030	724450	443740	-
950	Hmbp000848	279.16	-	-	278.151	[M+H]+	Phthalic acid Mono-2-ethylhexyl Ester	Others	640780	539440	211900	9	9	9	9	9	9	9	9	9	9	9	9	9	9	9	549990	215590	438960	-
951	mws0366	277.22	-	-	278.205	[M-H]-	γ-Linolenic Acid	Lipids	5617500	5956100	6214700	9	9	9	9	9	9	9	9	9	9	9	9	9	9	9	5460100	5925000	6676300	-
952	mws0367	277.1	-	-	278.205	[M-H]-	α-Linolenic Acid	Lipids	6334.7	7658.4	6896	9	9	9	9	9	9	9	9	9	9	9	9	9	9	9	6255.6	6941.2	7737.2	C06427
953	Lmhn002926	279.05	-	-	280.058	[M-H]-	p-Coumaroylmalic acid	Phenolic acids	8442.7	8460.7	13237	9	9	9	9	9	9	9	9	9	9	9	9	9	9	9	12862	9680.4	11469	-
954	mws0629	281.3	-	-	280.092	[M+H]+	Asp-phe	Amino acids and derivatives	126680	133700	122160	9	9	9	9	9	9	9	9	9	9	9	9	9	9	9	133450	126420	103180	-
955	mws1491	279.2	-	-	280.219	[M-H]-	Linoleic acid	Lipids	16459	11294	10128	9	9	9	9	9	9	9	9	9	9	9	9	9	9	9	12321	11238	11065	-
956	YC512118	282.28	-	-	281.249	[M+H]+	Octadecenoic amide	Others	43958	61119	65006	9	9	9	9	9	9	9	9	9	9	9	9	9	9	9	35785	19048	24068	-
957	mws2623	281.25	-	-	282.234	[M-H]-	11-Octadecanoic acid(Vaccenic acid)	Lipids	497040	574040	608600	9	9	9	9	9	9	9	9	9	9	9	9	9	9	9	568690	588300	698160	-
958	mws0396	281.25	-	-	282.234	[M-H]-	Elaidic Acid	Lipids	1182700	1449500	1460000	9	9	9	9	9	9	9	9	9	9	9	9	9	9	9	1448600	1496800	1573000	-
959	pme1178	284.09	-	-	283.078	[M+H]+	Guanosine	Nucleotides and derivatives	1743900	1791400	1881400	9	9	9	9	9	9	9	9	9	9	9	9	9	9	9	1717200	1918700	1494300	C00387
960	pmp000460	284.1	-	-	283.108	[M+H]+	N-cis-Paprazine	Alkaloids	898920	833070	852060	9	9	9	9	9	9	9	9	9	9	9	9	9	9	9	479560	866320	809940	-
961	pmp001178	284.1	-	-	283.108	[M+H]+	N-cis-sinapoyltyramine	Alkaloids	867750	846260	806190	9	9	9	9	9	9	9	9	9	9	9	9	9	9	9	443200	867690	871700	-
962	pmp001252	284.13	-	-	283.108	[M+H]+	N-p-Coumaroyltyramine	Alkaloids	25813	26834	23875	9	9	9	9	9	9	9	9	9	9	9	9	9	9	9	14287	27113	26378	-
963	pmn001729	282.11	-	-	283.108	[M-H]-	N-z-p-Coumaroyl tyramine	Alkaloids	312880	313300	303920	9	9	9	9	9	9	9	9	9	9	9	9	9	9	9	173960	321480	329110	-
964	mws0668	283	-	-	284.063	[M-H]-	Xanthosine	Nucleotides and derivatives	384190	375040	401000	9	9	9	9	9	9	9	9	9	9	9	9	9	9	9	450140	327380	325490	C01762
965	mws1489	283.26	-	-	284.248	[M-H]-	Stearic Acid	Lipids	28108000	27245000	30479000	9	9	9	9	9	9	9	9	9	9	9	9	9	9	9	33530000	32297000	29086000	-
966	mws1521	285.1	-	-	286.09	[M-H]-	Salicin	Phenolic acids	18338	19480	15975	9	9	9	9	9	9	9	9	9	9	9	9	9	9	9	12516	11246	11972	C01451
967	pmn001511	285.1	-	-	286.09	[M-H]-	3-Hydroxy-5-Methylphenol-1-Oxy-β-D-Glucose	Phenolic acids	9831.5	11046	9848.9	9	9	9	9	9	9	9	9	9	9	9	9	9	9	9	12517	14580	11196	-
968	Hmcp004650	287.22	-	-	286.212	[M+H]+	Hexadecanedioic acid	Lipids	305830	386880	387550	9	9	9	9	9	9	9	9	9	9	9	9	9	9	9	368950	485230	241530	-
969	HmLn007772	293.18	-	-	294.183	[M-H]-	Nordihydrocapsiate	Phenolic acids	638000	674630	649880	9	9	9	9	9	9	9	9	9	9	9	9	9	9	9	829450	660000	641240	-
970	pmn001687	295.05	-	-	296.041	[M-H]-	Cis-Coutaric acid	Phenolic acids	37600	37240	30823	9	9	9	9	9	9	9	9	9	9	9	9	9	9	9	31088	36006	22338	-
971	pmn001688	295.23	-	-	296.214	[M-H]-	9S-Hyroxy-10E,12E-octadecadienoic acid	Lipids	261400	280660	282420	9	9	9	9	9	9	9	9	9	9	9	9	9	9	9	242650	330380	228930	-
972	Rfmb090	295.23	-	-	296.214	[M-H]-	13-Hydroxy-9,11-octadecadienoic acid	Lipids	280720	292040	302630	9	9	9	9	9	9	9	9	9	9	9	9	9	9	9	258060	357970	250150	-
973	Rfmb091	295.23	-	-	296.214	[M-H]-	9-Hydroxy-10,12-octadecadienoic acid	Lipids	279670	295910	292090	9	9	9	9	9	9	9	9	9	9	9	9	9	9	9	250050	358110	247200	-
974	mws0724	298.1	-	-	299.072	[M-H]-	8-Hydroxyguanosine	Nucleotides and derivatives	18539	19453	12033	9	9	9	9	9	9	9	9	9	9	9	9	9	9	9	20456	11415	4763.9	-
975	Zmhn003269	299.02	-	-	300.028	[M-H]-	6-Hydroxyrhein	Quinones	498150	513730	511700	9	9	9	9	9	9	9	9	9	9	9	9	9	9	9	388530	444960	336790	-
976	pmp000001	301.07	-	-	300.053	[M+H]+	Hispidulin	Flavonoids	954730	1099600	1026100	9	9	9	9	9	9	9	9	9	9	9	9	9	9	9	843020	983990	709390	C10058
977	pmp000548	301.07	-	-	300.053	[M+H]+	Pratensein	Flavonoids	1350400	1361300	1342400	9	9	9	9	9	9	9	9	9	9	9	9	9	9	9	1123300	1238600	977030	C10520
978	pmp001127	301.11	-	-	300.053	[M+H]+	Chrysoeriol	Flavonoids	1448400	1440900	1385100	9	9	9	9	9	9	9	9	9	9	9	9	9	9	9	1120000	1309800	1010300	C04293
979	Zmhp003514	301.07	-	-	300.063	[M+H]+	6,7,8-Tetrahydroxy-5-methoxyflavone	Flavonoids	1319600	1286600	1302500	9	9	9	9	9	9	9	9	9	9	9	9	9	9	9	1029100	1220400	926080	-
980	Zmhn001926	299.08	-	-	300.084	[M-H]-	Salicylic acid O-glycoside	Phenolic acids	7409500	7645600	7136300	9	9	9	9	9	9	9	9	9	9	9	9	9	9	9	8362500	6651100	6887300	-
981	Zmxn001997	299.08	-	-	300.084	[M-H]-	Isosalicylic acid O-glycoside	Phenolic acids	7092500	7115000	7169600	9	9	9	9	9	9	9	9	9	9	9	9	9	9	9	9131900	6614400	6108200	-
982	Hmtn001302	299.08	-	-	300.085	[M-H]-	Glucosyloxybenzoic acid	Phenolic acids	7990500	7599100	7764500	9	9	9	9	9	9	9	9	9	9	9	9	9	9	9	9201000	6803900	6996600	-
983	Hmyn001360	299.11	-	-	300.135	[M-H]-	Doitungbiphenyl A	Others	552710	609160	568480	9	9	9	9	9	9	9	9	9	9	9	9	9	9	9	604210	541600	513050	-
984	Hmyp002315	303.04	-	-	302.042	[M+H]+	3,5,7,4'--Tetrahydroxy-Coumaronochromone	Others	486330	480270	881640	9	9	9	9	9	9	9	9	9	9	9	9	9	9	9	568870	487460	785820	-
985	mws1375	304.15	-	-	303.125	[M+H]+	Nicotianamine	Amino acids and derivatives	44307	55557	60185	9	9	9	9	9	9	9	9	9	9	9	9	9	9	9	38589	53647	65650	-
986	mws0044	303.06	-	-	304.047	[M-H]-	Taxifolin	Flavonoids	12964	8082.7	15592	9	9	9	9	9	9	9	9	9	9	9	9	9	9	9	12797	10833	19502	C01617
987	mws1604	306.2	-	-	305.18	[M+H]+	Capsaicin	Alkaloids	45914	44881	48890	9	9	9	9	9	9	9	9	9	9	9	9	9	9	9	47263	50475	31904	C06866
988	pme1086	306	-	-	307.068	[M-H]-	Glutathione reduced form	Amino acids and derivatives	7945.9	9573.4	6599	9	9	9	9	9	9	9	9	9	9	9	9	9	9	9	10468	6824.1	4322.3	C00051
989	Lmhn003074	309.06	-	-	310.069	[M-H]-	Feruloylmalic acid	Phenolic acids	32564	35819	36853	9	9	9	9	9	9	9	9	9	9	9	9	9	9	9	40298	35243	31644	-
990	mws0636	313.4	-	-	312.132	[M+H]+	Phe-Phe	Amino acids and derivatives	45185	39871	43235	9	9	9	9	9	9	9	9	9	9	9	9	9	9	9	44178	54798	26168	-
991	Rfmb087	311.22	-	-	312.208	[M-H]-	13-Oxo-9-hydroxy-10-octadecenoic acid	Lipids	30669	35438	36220	9	9	9	9	9	9	9	9	9	9	9	9	9	9	9	32630	36939	39268	-
992	pmn001689	311.22	-	-	312.208	[M-H]-	9-Hydroxy-12-oxo-10-octadecenoic acid	Lipids	15625	15703	18562	9	9	9	9	9	9	9	9	9	9	9	9	9	9	9	14219	14422	20171	-
993	mws1433	314.1	-	-	313.117	[M+H]+	N-Feruloyltyramine	Alkaloids	4957300	4584500	4746700	9	9	9	9	9	9	9	9	9	9	9	9	9	9	9	3708700	6917800	5056900	C02717
994	pmp001200	314.1	-	-	313.117	[M+H]+	Methoxy-N-Caffeoyltyramine	Alkaloids	5719200	5149100	5375300	9	9	9	9	9	9	9	9	9	9	9	9	9	9	9	4429300	7291400	5841200	-
995	pmp001256	314.14	-	-	313.131	[M+H]+	N-Cis-feruloyltyramine	Alkaloids	13372000	12379000	12633000	9	9	9	9	9	9	9	9	9	9	9	9	9	9	9	10812000	17194000	13569000	-
996	mws0066	315.06	-	-	316.047	[M-H]-	Isorhamnetin	Flavonoids	30942	32008	35211	9	9	9	9	9	9	9	9	9	9	9	9	9	9	9	24039	19209	18719	C10084
997	Lmmn004912	315.05	-	-	316.058	[M-H]-	Quercetin-3-O-methyl ether	Flavonoids	2051900	1973600	2043600	9	9	9	9	9	9	9	9	9	9	9	9	9	9	9	1441100	1764700	1321900	C04443
998	pmn001367	315.07	-	-	316.065	[M-H]-	Protocatechuic acid-4-glucoside	Phenolic acids	5487400	5488000	5741900	9	9	9	9	9	9	9	9	9	9	9	9	9	9	9	6661700	4636000	5584100	-
999	Hmtn001120	315.11	-	-	316.116	[M-H]-	5-(2-Hydroxyethyl)-2-O-glucosylohenol	Phenolic acids	38546000	37856000	38014000	9	9	9	9	9	9	9	9	9	9	9	9	9	9	9	38113000	38578000	35749000	-
1000	YC512119	318.3	-	-	317.266	[M+H]+	Phytosphingosine	Others	2234000	1730100	2261500	9	9	9	9	9	9	9	9	9	9	9	9	9	9	9	2422400	3323100	2988800	-
1001	mws0744	319.05	-	-	320.041	[M-H]-	Dihydromyricetin(Ampelopsin)	Flavonoids	145670	168960	185570	9	9	9	9	9	9	9	9	9	9	9	9	9	9	9	152330	199070	119890	C02906
1002	HmLp008036	322.24	-	-	321.23	[M+H]+	Homodihydrocapsaicin	Alkaloids	17660	18382	14552	9	9	9	9	9	9	9	9	9	9	9	9	9	9	9	17162	23538	14669	-
1003	pme3174	324	-	-	323.037	[M+H]+	Cytidine 5'-monophosphate(Cytidylic acid)	Nucleotides and derivatives	11035	15736	10305	9	9	9	9	9	9	9	9	9	9	9	9	9	9	9	12634	5777.4	9732.6	C00055
1004	YC512115	325.18	-	-	324.132	[M+H]+	Nicotine-Hex	Alkaloids	52100000	66155000	56107000	9	9	9	9	9	9	9	9	9	9	9	9	9	9	9	60309000	47819000	38257000	-
1005	YC512112	325.18	-	-	324.15	[M+H]+	Anabasine-Hexose	Alkaloids	38457000	47519000	46314000	9	9	9	9	9	9	9	9	9	9	9	9	9	9	9	48829000	36197000	28450000	-
1006	pmn001419	325.09	-	-	326.085	[M-H]-	1-O-[(E)-p-Cumaroyl]-β-D-glucopyranose	Phenolic acids	7096400	6871100	6763200	9	9	9	9	9	9	9	9	9	9	9	9	9	9	9	7317400	6880600	7061400	-
1007	HmLn002835	325.09	-	-	326.1	[M-H]-	Cis-p-coumaric acid 4-O-glucoside	Others	3890000	3834400	3801000	9	9	9	9	9	9	9	9	9	9	9	9	9	9	9	3903100	3773100	4018800	-
1008	Zmhn002301	325.09	-	-	326.1	[M-H]-	p-Coumaric acid-O-glycoside	Phenolic acids	3823900	3788300	3816700	9	9	9	9	9	9	9	9	9	9	9	9	9	9	9	3896900	4040000	4035500	-
1009	pmn001690	327.1	-	-	328.133	[M-H]-	3-Hydroxy-4-isopropylbenzylalcohol 3-glucoside	Phenolic acids	419290	445910	448960	9	9	9	9	9	9	9	9	9	9	9	9	9	9	9	412520	420730	440720	-
1010	pmn001691	327.22	-	-	328.202	[M-H]-	9,12,13-Trihyroxy-10,15-octadecadienoic acid	Lipids	106640	109960	115840	9	9	9	9	9	9	9	9	9	9	9	9	9	9	9	85996	107520	141010	-
1011	mws0884	328.1	-	-	329.038	[M-H]-	Cyclic AMP	Nucleotides and derivatives	121850	114410	128120	9	9	9	9	9	9	9	9	9	9	9	9	9	9	9	153630	128590	118580	C00575
1012	mws0917	329	-	-	330.061	[M-H]-	3,7-Di-O-methylquercetin	Flavonoids	5674400	5785900	5789200	9	9	9	9	9	9	9	9	9	9	9	9	9	9	9	4586000	5500400	3957100	C01265
1013	Lmtn002565	329.11	-	-	330.095	[M-H]-	1'-O-Vanilloyl-β-D-glucoside	Phenolic acids	83412	94352	86621	9	9	9	9	9	9	9	9	9	9	9	9	9	9	9	92678	92153	53532	-
1014	Zmhn001883	329.09	-	-	330.095	[M-H]-	Vanillic acid glycoside	Phenolic acids	19850	19654	20174	9	9	9	9	9	9	9	9	9	9	9	9	9	9	9	22269	20533	16062	-
1015	pmn001517	329.1	-	-	330.113	[M-H]-	3,4,5-Trimethoxyphenyl-β-D-Glucopyranoside	Phenolic acids	24778000	26329000	29536000	9	9	9	9	9	9	9	9	9	9	9	9	9	9	9	28210000	27534000	23713000	-
1016	pmn001694	329.23	-	-	330.217	[M-H]-	9,10,13-Trihyroxy-11-octadecadienoic acid	Lipids	104700	110190	107020	9	9	9	9	9	9	9	9	9	9	9	9	9	9	9	87336	112060	114670	-
1017	pmn001495	329.2	-	-	330.251	[M-H]-	Hexadecanoic acid 2,3-dihydroxypropyl ester	Lipids	110830	111460	118040	9	9	9	9	9	9	9	9	9	9	9	9	9	9	9	91535	124420	118450	-
1018	pmn001627	331.1	-	-	332.059	[M-H]-	Glucogallin	Phenolic acids	244020	201730	290990	9	9	9	9	9	9	9	9	9	9	9	9	9	9	9	232760	293590	249450	-
1019	pmp000260	333.08	-	-	332.059	[M+H]+	6-O-Galloyl-β-D-glucopyranoside	Phenolic acids	21390	28369	28230	9	9	9	9	9	9	9	9	9	9	9	9	9	9	9	19749	33976	19598	-
1020	HmLn000873	331.07	-	-	332.075	[M-H]-	2-O-Galloyl-β-D-glucose	Tannins	637210	674000	643080	9	9	9	9	9	9	9	9	9	9	9	9	9	9	9	849590	532870	621380	-
1021	HmLn000659	331.07	-	-	332.075	[M-H]-	3-O-Galloyl-β-D-glucose	Tannins	220120	205620	339570	9	9	9	9	9	9	9	9	9	9	9	9	9	9	9	266850	242090	239190	-
1022	mws0675	335.1	-	-	334.041	[M+H]+	β-Nicotinamide mononucleotide	Nucleotides and derivatives	39230	77589	33662	9	9	9	9	9	9	9	9	9	9	9	9	9	9	9	49589	40110	44708	C00455
1023	mws0932	337.24	-	-	336.208	[M+H]+	15s-Hydroperoxyeicosatetraenoic Acid[15(S)-HpETE]	Lipids	55541	59377	60670	9	9	9	9	9	9	9	9	9	9	9	9	9	9	9	71671	60464	45624	-
1024	pmp000232	339.1	-	-	338.085	[M+H]+	Cis-3-p-coumaric quinic acid	Phenolic acids	788700	929460	895150	9	9	9	9	9	9	9	9	9	9	9	9	9	9	9	1041400	681620	654630	-
1025	YC512113	339.15	-	-	338.13	[M+H]+	Cotinine-Hexose	Alkaloids	6082200	7055300	5388400	9	9	9	9	9	9	9	9	9	9	9	9	9	9	9	9784200	3983100	3006700	-
1026	Lmyp000435	339.16	-	-	338.148	[M+H]+	Nicotine Glucuronide	Alkaloids	4089200	6330400	7045400	9	9	9	9	9	9	9	9	9	9	9	9	9	9	9	9129200	3938500	2771000	-
1027	pme3311	339	-	-	339.996	[M-H]-	D-Fructose-1,6-biphosphate	Others	37708	34282	22658	9	9	9	9	9	9	9	9	9	9	9	9	9	9	9	27722	24836	27437	-
1028	mws1015	339.1	-	-	340.065	[M-H]-	Esculin(6,7-DihydroxyCoumarin-6-glucoside)	Lignans and Coumarins	11566000	10712000	11496000	9	9	9	9	9	9	9	9	9	9	9	9	9	9	9	10921000	10892000	10234000	C09264
1029	pmn001420	341.08	-	-	342.079	[M-H]-	1-O-[(E)-Caffeoyl]-β-D-glucopyranose	Phenolic acids	728070	752760	896540	9	9	9	9	9	9	9	9	9	9	9	9	9	9	9	871880	864220	706790	-
1030	Zmhn002242	341.09	-	-	342.095	[M-H]-	Caffeoyl glucose	Phenolic acids	22495	19059	20453	9	9	9	9	9	9	9	9	9	9	9	9	9	9	9	22101	14250	11471	C10433
1031	mws5038	341.11	-	-	342.096	[M-H]-	Isomaltulose	Others	1468000	1720400	1883600	9	9	9	9	9	9	9	9	9	9	9	9	9	9	9	1513300	1271500	1747900	-
1032	mws1080	341.1	-	-	342.096	[M-H]-	Galactinol	Others	4920500	6044800	5110700	9	9	9	9	9	9	9	9	9	9	9	9	9	9	9	6068000	4847500	6823400	-
1033	mws0264	341	-	-	342.096	[M-H]-	D-(+)-TrehaloseAnhydrous	Others	615750	783030	899620	9	9	9	9	9	9	9	9	9	9	9	9	9	9	9	701130	535590	701640	-
1034	mws1333	341.12	-	-	342.096	[M-H]-	Melibiose	Others	834940	767960	627470	9	9	9	9	9	9	9	9	9	9	9	9	9	9	9	635460	560690	783380	C05402
1035	mws0906	341	-	-	342.113	[M-H]-	Coniferin	Phenolic acids	3026300	2816100	3199000	9	9	9	9	9	9	9	9	9	9	9	9	9	9	9	3475600	2584600	2661000	C00761
1036	mws0609	344.2	-	-	345.033	[M-H]-	Guanosine 3',5'-cyclic monophosphate	Nucleotides and derivatives	49840	42299	46799	9	9	9	9	9	9	9	9	9	9	9	9	9	9	9	60186	38326	29652	C00942
1037	pmb1562	351	-	-	350.222	[M+H]+	MAG(18:4)isomer3	Lipids	18393	20048	20688	9	9	9	9	9	9	9	9	9	9	9	9	9	9	9	19301	27486	18882	-
1038	mws0178	353.1	-	-	354.079	[M-H]-	Chlorogenic acid	Phenolic acids	1203400	1166500	1179500	9	9	9	9	9	9	9	9	9	9	9	9	9	9	9	1195800	1075100	1209000	C00852
1039	mws1077	355.1	-	-	354.079	[M+H]+	Scopolin	Lignans and Coumarins	11320000	9989200	10203000	9	9	9	9	9	9	9	9	9	9	9	9	9	9	9	12525000	8263000	9725100	C01527
1040	pmp000545	355.1	-	-	354.079	[M+H]+	4-Caffeoylquinic acid	Phenolic acids	4331600	4113300	4024100	9	9	9	9	9	9	9	9	9	9	9	9	9	9	9	4330500	3884000	3929800	-
1041	pmp001283	355.29	-	-	354.251	[M+H]+	Glyceryl linoleate	Lipids	32848	37079	34898	9	9	9	9	9	9	9	9	9	9	9	9	9	9	9	35082	27255	32583	-
1042	Zmhn002422	355.1	-	-	356.11	[M-H]-	Feruloyl glucose	Phenolic acids	5967100	6309300	6573700	9	9	9	9	9	9	9	9	9	9	9	9	9	9	9	6102200	6276200	4635000	C17759
1043	pme0085	359.3	-	-	360.07	[M-H]-	Rosmarinic acid	Phenolic acids	235240	133910	179250	9	9	9	9	9	9	9	9	9	9	9	9	9	9	9	131040	185990	134740	C01850
1044	mws1562	361.12	-	-	362.102	[M-H]-	Catalpol	Others	56750	64915	73335	9	9	9	9	9	9	9	9	9	9	9	9	9	9	9	58111	74346	63764	-
1045	mws5040	365.11	-	-	364.078	[M+H]+	Turanose	Others	304140	530350	524500	9	9	9	9	9	9	9	9	9	9	9	9	9	9	9	244230	275910	287790	-
1046	mws0179	367	-	-	368.093	[M-H]-	Chlorogenic acid methyl ester	Phenolic acids	3195200	3456900	3466100	9	9	9	9	9	9	9	9	9	9	9	9	9	9	9	3179800	3490300	3319000	-
1047	pmb0752	369.1	-	-	368.093	[M+H]+	3-O-Feruloyl quinic acid	Phenolic acids	436150	405890	422030	9	9	9	9	9	9	9	9	9	9	9	9	9	9	9	468650	410400	403310	C02572
1048	pmn001695	371.1	-	-	372.088	[M-H]-	Trihydroxycinnamoylquinic acid	Phenolic acids	1598300	1681600	1578900	9	9	9	9	9	9	9	9	9	9	9	9	9	9	9	1874400	1627500	1408200	-
1049	mws0011	371.1	-	-	372.122	[M-H]-	Syringin	Phenolic acids	456550	512040	543440	9	9	9	9	9	9	9	9	9	9	9	9	9	9	9	603700	471390	456520	C01533
1050	mws0232	377	-	-	376.12	[M+H]+	Riboflavin	Others	1902800	1985900	2036200	9	9	9	9	9	9	9	9	9	9	9	9	9	9	9	2010600	2102600	1696700	C00255
1051	pme3337	384	-	-	383.09	[M+H]+	N6-Succinyl Adenosine	Nucleotides and derivatives	851230	946470	861510	9	9	9	9	9	9	9	9	9	9	9	9	9	9	9	864370	923900	745220	-
1052	Zmhn002513	385.11	-	-	386.121	[M-H]-	Isosinapic acid-hexoside	Phenolic acids	13066000	11206000	12787000	9	9	9	9	9	9	9	9	9	9	9	9	9	9	9	10804000	12682000	11354000	-
1053	Zmhn002227	385.11	-	-	386.121	[M-H]-	Sinapic acid-glycoside	Phenolic acids	653320	563130	693240	9	9	9	9	9	9	9	9	9	9	9	9	9	9	9	655120	632290	616720	-
1054	Lmzn001582	387.17	-	-	388.174	[M-H]-	5'-Glucopyranosyloxyjasmanic acid	Phenolic acids	203200	228140	202570	9	9	9	9	9	9	9	9	9	9	9	9	9	9	9	203050	271900	208120	-
1055	pmn001738	403.1	-	-	404.111	[M-H]-	Oleoside 11-methyl ester	Phenolic acids	56017	44920	38016	9	9	9	9	9	9	9	9	9	9	9	9	9	9	9	53849	28839	33040	-
1056	Lmyp004617	419.13	-	-	418.127	[M+H]+	Pinocembrin 7-O-β-D-glucoside(Pinocembroside)	Flavonoids	123990	107410	101970	9	9	9	9	9	9	9	9	9	9	9	9	9	9	9	132610	143210	140710	-
1057	pmn001494	417.2	-	-	418.142	[M-H]-	(+)-Syringaresinol	Lignans and Coumarins	22280	22942	22025	9	9	9	9	9	9	9	9	9	9	9	9	9	9	9	24533	21954	23325	C10889
1058	mws2523	421.1	-	-	422.06	[M-H]-	Trehalose 6-phosphate	Others	61567	57598	53002	9	9	9	9	9	9	9	9	9	9	9	9	9	9	9	60922	50827	66087	C00689
1059	mad1424	427.06	-	-	426.028	[M+H]+	Ditartaroyl-hydroxylcoumarin	Phenolic acids	200560	193900	191200	9	9	9	9	9	9	9	9	9	9	9	9	9	9	9	241190	225100	165180	-
1060	pme2117	426	-	-	427.029	[M-H]-	Adenosine 5'-Diphosphate	Nucleotides and derivatives	24379	19918	26196	9	9	9	9	9	9	9	9	9	9	9	9	9	9	9	30426	21666	11460	C00008
1061	pmn001336	431.1	-	-	432.088	[M-H]-	Aloeemodin-8-O-D-glucopyranoside	Quinones	43877	55284	53077	9	9	9	9	9	9	9	9	9	9	9	9	9	9	9	42120	46064	43927	-
1062	Lmtn002324	431.15	-	-	432.163	[M-H]-	Benzyl-β-D-glucopyranosyl(1-6)-β-D-glucopyranoside	Others	14735	20734	24465	9	9	9	9	9	9	9	9	9	9	9	9	9	9	9	27486	16287	21274	-
1063	mws4183	433.08	-	-	434.068	[M-H]-	Quercetin-3-O-α-L-arabinopyranoside(guaijaverin)	Flavonoids	434820	427110	347110	9	9	9	9	9	9	9	9	9	9	9	9	9	9	9	354590	363780	422900	-
1064	mws1179	433	-	-	434.102	[M-H]-	Naringenin 7-O-glucoside (Prunin)	Flavonoids	81153	70684	84691	9	9	9	9	9	9	9	9	9	9	9	9	9	9	9	76900	94028	67092	C09099
1065	Zmhn003534	433.11	-	-	434.121	[M-H]-	Naringenin-O-glucoside	Flavonoids	118560	128920	119040	9	9	9	9	9	9	9	9	9	9	9	9	9	9	9	117410	142940	107140	-
1066	pme1014	445.3	-	-	444.303	[M+H]+	Menaquinone (K2)	Others	2258300	2041800	2915700	9	9	9	9	9	9	9	9	9	9	9	9	9	9	9	44916	34752	22043	C00828
1067	mws0089	447.09	-	-	448.082	[M-H]-	Kaempferol-7-O-glucosdie	Flavonoids	393490	302800	169480	9	9	9	9	9	9	9	9	9	9	9	9	9	9	9	190870	378590	363350	-
1068	mws2209	447.1	-	-	448.082	[M-H]-	Astragalin (Kaempferol 3-O-Glucoside)	Flavonoids	600910	232020	558240	9	9	9	9	9	9	9	9	9	9	9	9	9	9	9	472040	380660	219800	-
1069	pme2459	449.1	-	-	448.082	[M+H]+	Luteolin 7-O-glucoside(Cynaroside)	Flavonoids	13522000	6625800	13253000	9	9	9	9	9	9	9	9	9	9	9	9	9	9	9	18113000	17416000	15816000	C03951
1070	mws0045	449.1	-	-	448.082	[M+H]+	Quercitrin	Flavonoids	323130	247890	243060	9	9	9	9	9	9	9	9	9	9	9	9	9	9	9	339420	270730	277130	-
1071	Hmcp002316	449.11	-	-	448.1	[M+H]+	Isorhamnetin-O-Pentoside	Flavonoids	22812	18767	17197	9	9	9	9	9	9	9	9	9	9	9	9	9	9	9	27089	20297	29496	-
1072	Lmbp003393	449.11	-	-	448.1	[M+H]+	Quercetin-3-O-α-L-rhamnopyranoside	Flavonoids	1819400	1460700	1465800	9	9	9	9	9	9	9	9	9	9	9	9	9	9	9	2001900	1862100	1729800	-
1073	Lmmp003422	449.11	-	-	448.101	[M+H]+	Kaempferol-3-O-β-D-glucopyranoside	Flavonoids	2237200	1515000	1575400	9	9	9	9	9	9	9	9	9	9	9	9	9	9	9	2164300	2143800	2203800	-
1074	Zmhn001905	447.09	-	-	448.101	[M-H]-	Hydroxyaloe-emodin-O-glucoside	Quinones	80560	70483	67078	9	9	9	9	9	9	9	9	9	9	9	9	9	9	9	62703	49274	63511	-
1075	Lmlp003531	449.11	-	-	448.101	[M+H]+	Luteolin 3'-O-β-D-glucoside	Flavonoids	2159900	1506300	1517800	9	9	9	9	9	9	9	9	9	9	9	9	9	9	9	2149300	1674400	2180300	-
1076	pmb0876	454.2	-	-	453.253	[M+H]+	LysoPE 16:0	Lipids	4841400	4505100	4794600	9	9	9	9	9	9	9	9	9	9	9	9	9	9	9	4182700	5418000	5662500	-
1077	pmp001309	465.1	-	-	464.076	[M+H]+	6-Hydroxykaempferol-7-O-glucoside	Flavonoids	31868000	29412000	22409000	9	9	9	9	9	9	9	9	9	9	9	9	9	9	9	34936000	23570000	24922000	-
1078	mws0091	463.09	-	-	464.076	[M-H]-	Isoquercitrin(Quercetin 3-O-β-D-glucoside)	Flavonoids	6220100	7983900	8438400	9	9	9	9	9	9	9	9	9	9	9	9	9	9	9	8695700	6447000	6738200	-
1079	mws0856	463	-	-	464.076	[M-H]-	Spiraeoside	Flavonoids	4008200	5650800	5439700	9	9	9	9	9	9	9	9	9	9	9	9	9	9	9	4556500	3534900	4445000	-
1080	mws0061	463.1	-	-	464.095	[M-H]-	Hyperin	Flavonoids	8733200	9370800	7848500	9	9	9	9	9	9	9	9	9	9	9	9	9	9	9	7731700	7385100	8288200	C10073
1081	Hmcn001884	463.09	-	-	464.095	[M-H]-	6-Hydroxyluteolin 5-glucoside	Flavonoids	2636500	3891200	4535500	9	9	9	9	9	9	9	9	9	9	9	9	9	9	9	3304200	2398700	2637400	-
1082	mws1329	463.09	-	-	464.095	[M-H]-	Quercetin-7-O-Glucoside	Flavonoids	5268700	5350500	5951800	9	9	9	9	9	9	9	9	9	9	9	9	9	9	9	7010300	5293400	6780500	-
1083	Lmdp003286	465.1	-	-	464.095	[M+H]+	Isohyperoside	Flavonoids	12273000	11581000	13035000	9	9	9	9	9	9	9	9	9	9	9	9	9	9	9	15212000	14323000	14574000	-
1084	Lmzp002365	465.14	-	-	464.131	[M+H]+	Hesperetin-7-O-glucoside	Flavonoids	482350	223940	357500	9	9	9	9	9	9	9	9	9	9	9	9	9	9	9	464720	534670	411610	-
1085	pme1398	465.1	-	-	465.103	[M]+	Delphinidin 3-O-glucoside (Mirtillin)	Flavonoids	59832	34010	75270	9	9	9	9	9	9	9	9	9	9	9	9	9	9	9	62406	55724	61450	C12138
1086	pmd0130	468.3	-	-	467.268	[M+H]+	LysoPC 14:0(2n isomer)	Lipids	62245	61655	56858	9	9	9	9	9	9	9	9	9	9	9	9	9	9	9	57395	79234	69465	-
1087	pmb0504	469.1	-	-	468.222	[M+H]+	N-(4'-O-glycosyl)-feruloyl agmatine	Phenolic acids	14551	6262.6	12417	9	9	9	9	9	9	9	9	9	9	9	9	9	9	9	25301	16599	6319.5	-
1088	mad2400	471.1	-	-	472.082	[M-H]-	p-Coumaroylferuloyltartaric acid	Phenolic acids	7947.2	6051.9	10741	9	9	9	9	9	9	9	9	9	9	9	9	9	9	9	11582	11560	7746	-
1089	pmn001727	474.18	-	-	475.161	[M-H]-	N-(4-O-(β-D-Glucopyranosyl)-E-feruloyl)-tyramine	Alkaloids	2633100	2674100	2739800	9	9	9	9	9	9	9	9	9	9	9	9	9	9	9	3126700	2458700	2457500	-
1090	pmb0874	478.6	-	-	477.253	[M+H]+	LysoPE 18:2(2n isomer)	Lipids	188350	185990	172960	9	9	9	9	9	9	9	9	9	9	9	9	9	9	9	170700	223120	204300	-
1091	Hmcp002207	479.12	-	-	478.111	[M+H]+	Isorhamnetin-7-O-β-D-glucopyranoside	Flavonoids	162790	117150	111900	9	9	9	9	9	9	9	9	9	9	9	9	9	9	9	174460	125590	201400	-
1092	pme3391	479.12	-	-	479.119	[M]+	Petunidin 3-O-glucoside	Flavonoids	35970	33060	27105	9	9	9	9	9	9	9	9	9	9	9	9	9	9	9	45827	16397	29783	C12139
1093	pmb0856	480.31	-	-	479.268	[M+H]+	LysoPE 18:1(2n isomer)	Lipids	78385	74940	76499	9	9	9	9	9	9	9	9	9	9	9	9	9	9	9	82823	67639	95235	-
1094	mws0289	478.1	-	-	479.268	[M-H]-	LysoPE 18:1	Lipids	196180	210660	210300	9	9	9	9	9	9	9	9	9	9	9	9	9	9	9	166540	220160	209520	-
1095	pme3485	481.09	-	-	480.09	[M+H]+	Myricetin 3-O-galactoside	Flavonoids	162550	97962	109380	9	9	9	9	9	9	9	9	9	9	9	9	9	9	9	178760	125500	112970	-
1096	Hmyn007081	481.25	-	-	482.262	[M-H]-	LysoPG(16:1)	Lipids	348890	338820	305280	9	9	9	9	9	9	9	9	9	9	9	9	9	9	9	306200	314780	280350	-
1097	Hmyn007168	483.27	-	-	484.278	[M-H]-	LysoPG(16:0)	Lipids	1102200	1303700	1258000	9	9	9	9	9	9	9	9	9	9	9	9	9	9	9	1276600	1228500	1344200	-
1098	Zmhn003565	489.1	-	-	490.111	[M-H]-	Kaempferol-3-O-(6''-acetyl)-glucoside	Flavonoids	240650	375430	370500	9	9	9	9	9	9	9	9	9	9	9	9	9	9	9	296800	275180	193030	-
1099	pmb0790	494.1	-	-	493.153	[M+H]+	Pyridoxine di-O-hexoside	Others	3798	6542	6751.2	9	9	9	9	9	9	9	9	9	9	9	9	9	9	9	9383.5	7677.4	3546.6	-
1100	pmp001270	494.33	-	-	493.282	[M+H]+	LysoPC(16:1)	Lipids	428330	414420	437170	9	9	9	9	9	9	9	9	9	9	9	9	9	9	9	388050	450820	397300	-
1101	Hmln002199	505.1	-	-	506.107	[M-H]-	Quercetin-3-O-(6''-O-acetyl)-galactoside	Flavonoids	217790	276260	323580	9	9	9	9	9	9	9	9	9	9	9	9	9	9	9	343670	234380	367230	-
1102	Hmqp006235	516.3	-	-	515.297	[M+H]+	LysoPC 18:4	Lipids	23221	21795	25527	9	9	9	9	9	9	9	9	9	9	9	9	9	9	9	29117	22083	22714	-
1103	Li512115	515.12	-	-	516.105	[M-H]-	3,4-Dicaffeoylquinic acid	Phenolic acids	16806000	16930000	18976000	9	9	9	9	9	9	9	9	9	9	9	9	9	9	9	15624000	17491000	16943000	C10468
1104	pmn001384	515.12	-	-	516.105	[M-H]-	Isochlorogenic acid C	Phenolic acids	13453000	16815000	14632000	9	9	9	9	9	9	9	9	9	9	9	9	9	9	9	12070000	13827000	12801000	-
1105	pmn001382	515.12	-	-	516.105	[M-H]-	Isochlorogenic acid A	Phenolic acids	14465000	16449000	13616000	9	9	9	9	9	9	9	9	9	9	9	9	9	9	9	11692000	12728000	12511000	-
1106	mws1584	515.12	-	-	516.105	[M-H]-	Cynarin	Phenolic acids	1754200	1876800	1589300	9	9	9	9	9	9	9	9	9	9	9	9	9	9	9	2280200	2368200	1522600	C10445
1107	pmb0576	519	-	-	518	[M+H]+	Apigenin O-malonylhexoside	Flavonoids	13774	11292	8856.7	9	9	9	9	9	9	9	9	9	9	9	9	9	9	9	18114	20798	10074	-
1108	pmn001334	517.1	-	-	518.12	[M-H]-	Emodin-8-O-(6'-O-malonyl)-glucopyranoside	Quinones	89931	96737	99947	9	9	9	9	9	9	9	9	9	9	9	9	9	9	9	106440	108670	68302	-
1109	pmp001273	520.34	-	-	519.296	[M+H]+	LysoPC 18:2	Lipids	35480000	34531000	34019000	9	9	9	9	9	9	9	9	9	9	9	9	9	9	9	36976000	34796000	35387000	-
1110	Rfmb25703	519.19	-	-	520.168	[M-H]-	Pinoresinol-Hexose	Lignans and Coumarins	226140	272200	227440	9	9	9	9	9	9	9	9	9	9	9	9	9	9	9	250770	252360	223220	-
1111	pmp001251	520.34	-	-	520.304	[M+H]+	LysoPC 18:2(isomer)	Lipids	35131000	34752000	35055000	9	9	9	9	9	9	9	9	9	9	9	9	9	9	9	35747000	36566000	32527000	-
1112	pmp001281	522.36	-	-	521.311	[M+H]+	LysoPC(18:1)	Lipids	4022400	3673200	3800000	9	9	9	9	9	9	9	9	9	9	9	9	9	9	9	4563200	3305000	3672100	-
1113	pmn001710	521.13	-	-	522.114	[M-H]-	Rosmarinyl Glucoside	Phenolic acids	43594	51338	36406	9	9	9	9	9	9	9	9	9	9	9	9	9	9	9	42794	55744	34163	-
1114	mws0126	524.37	-	-	523.325	[M+H]+	1-Stearoyl-sn-glycero-3-phosphocholine	Lipids	2796400	3057900	3082500	9	9	9	9	9	9	9	9	9	9	9	9	9	9	9	2673500	2713000	2665600	-
1115	Hmln002483	533.1	-	-	534.101	[M-H]-	Kaempferol-3-O-(6''-malonyl)-glucoside	Flavonoids	249300	256840	233320	9	9	9	9	9	9	9	9	9	9	9	9	9	9	9	229970	260040	210970	-
1116	pmp001110	535.14	-	-	534.114	[M+H]+	Apigenin-6-C-β-D-xyloside-8-C-β-Darabinoside	Flavonoids	38479	41104	42903	9	9	9	9	9	9	9	9	9	9	9	9	9	9	9	43155	24740	32513	-
1117	pmp001282	544.34	-	-	543.296	[M+H]+	Propyl2-(trimethylammonio)ethyl phosphate	Others	33757	30060	34626	9	9	9	9	9	9	9	9	9	9	9	9	9	9	9	40018	30582	37614	-
1118	pmp000588	549.12	-	-	548.094	[M+H]+	Diosmetin-7-O-(6'-O-malonyl)-β-D-glucoside	Flavonoids	22439	18696	16657	9	9	9	9	9	9	9	9	9	9	9	9	9	9	9	19457	24021	18444	-
1119	pmn001671	547.2	-	-	548.146	[M-H]-	β-D-Furanofructosyl-α-D-(6-mustard acyl)glucoside	Phenolic acids	35933	30966	32798	9	9	9	9	9	9	9	9	9	9	9	9	9	9	9	23448	38188	23387	-
1120	pmp000589	551.1	-	-	550.074	[M+H]+	Quercetin-7-O-(6'-O-malonyl)-β-D-glucoside	Flavonoids	2057100	1596800	1606200	9	9	9	9	9	9	9	9	9	9	9	9	9	9	9	2573200	1743900	1921500	-
1121	Hmln002189	549.09	-	-	550.096	[M-H]-	Quercetin-3-O-(6''-O-malonyl)-galactoside	Flavonoids	898090	920430	833280	9	9	9	9	9	9	9	9	9	9	9	9	9	9	9	931120	936290	857170	-
1122	mws1138	551.16	-	-	550.119	[M+H]+	Betanin	Alkaloids	1227100	928100	905640	9	9	9	9	9	9	9	9	9	9	9	9	9	9	9	1771600	498250	950100	-
1123	pma0702	558.28	-	-	557.274	[M+H]+	N', N''-disinapoylspermidine	Phenolic acids	155130	59744	129160	9	9	9	9	9	9	9	9	9	9	9	9	9	9	9	133290	126550	127520	-
1124	Hmmp002984	560.39	-	-	559.387	[M+H]+	γ-Chaconine	Alkaloids	27953	24233	21014	9	9	9	9	9	9	9	9	9	9	9	9	9	9	9	20961	24094	28647	-
1125	Hmmp002761	560.39	-	-	559.387	[M+H]+	γ-Solanine	Alkaloids	92993	87165	88238	9	9	9	9	9	9	9	9	9	9	9	9	9	9	9	72576	89904	82503	-
1126	Rfmb25702	561.2	-	-	562.177	[M-H]-	Pinoresinol-acetylglucose	Lignans and Coumarins	107250	123380	127750	9	9	9	9	9	9	9	9	9	9	9	9	9	9	9	87856	147550	141680	-
1127	pmp000593	595.16	-	-	594.132	[M+H]+	Luteolin-7-O-rutinoside	Flavonoids	2321400	2055600	2037300	9	9	9	9	9	9	9	9	9	9	9	9	9	9	9	2480200	2402700	2194000	-
1128	Lmmp003217	595.14	-	-	594.137	[M+H]+	Kaempferol-3-O-β-D-(6''-O-(E)-p-coumaroyl)glucopyranoside	Flavonoids	4777400	4387400	4183200	9	9	9	9	9	9	9	9	9	9	9	9	9	9	9	5259400	5234800	4967400	-
1129	Lmbp003230	595.16	-	-	594.158	[M+H]+	Kaempferol-3-O-neohesperidoside	Flavonoids	5570000	4658800	4374400	9	9	9	9	9	9	9	9	9	9	9	9	9	9	9	5600000	5613600	5005800	-
1130	Li512117	611.16	-	-	610.126	[M+H]+	Quercetin-3-O-rhanosylgalactoside	Flavonoids	14335000	13666000	13817000	9	9	9	9	9	9	9	9	9	9	9	9	9	9	9	15987000	15720000	15668000	-
1131	pmp000595	611.16	-	-	610.126	[M+H]+	Luteolin-7,3'-Di-O-β-D-Glucoside	Flavonoids	1418800	1200400	1195000	9	9	9	9	9	9	9	9	9	9	9	9	9	9	9	1073900	1657500	886360	-
1132	mws0059	609.1	-	-	610.126	[M-H]-	Rutin	Flavonoids	2600700	2799600	2611000	9	9	9	9	9	9	9	9	9	9	9	9	9	9	9	2720100	2438200	2449200	-
1133	pmb0622	611.2	-	-	610.126	[M+H]+	C-Hexosyl-luteolin O-hexoside	Flavonoids	20238	20650	23056	9	9	9	9	9	9	9	9	9	9	9	9	9	9	9	26233	33636	22236	-
1134	pmn001583	609.1	-	-	610.126	[M-H]-	Quercetin-3-O-robinobioside	Flavonoids	2101100	2244400	2103700	9	9	9	9	9	9	9	9	9	9	9	9	9	9	9	1961700	2470700	1978000	-
1135	Lmmp000897	611.14	-	-	610.132	[M+H]+	Gallocatechin-Gallocatechin	Flavonoids	3589400	3415200	3679800	9	9	9	9	9	9	9	9	9	9	9	9	9	9	9	4355600	4607800	3682900	-
1136	Hmpp002612	611.15	-	-	610.145	[M+H]+	Luteolin-7-O-β-D-gentiobioside	Flavonoids	371330	326940	382490	9	9	9	9	9	9	9	9	9	9	9	9	9	9	9	361030	465630	306610	-
1137	Hmmp002336	611.16	-	-	610.148	[M+H]+	Quercetin-O-feruloyl-Pentoside	Flavonoids	14208000	12374000	12623000	9	9	9	9	9	9	9	9	9	9	9	9	9	9	9	14236000	14541000	15082000	-
1138	Lmbp002592	611.16	-	-	610.153	[M+H]+	Kaempferol-3,7-di-O-β-D-glucopyranoside	Flavonoids	4489200	4135000	3574100	9	9	9	9	9	9	9	9	9	9	9	9	9	9	9	3331700	4350700	2806200	-
1139	Lmbp002336	611.16	-	-	610.153	[M+H]+	Quercetin-3-O-(2-O-α-L-rhamnopyranosyl)-β-D-galactopyranoside	Flavonoids	173490	175250	177390	9	9	9	9	9	9	9	9	9	9	9	9	9	9	9	206400	156170	180120	-
1140	mws0036	609.19	-	-	610.16	[M-H]-	Hesperidin	Flavonoids	30529000	27215000	27721000	9	9	9	9	9	9	9	9	9	9	9	9	9	9	9	32544000	27294000	33071000	C09755
1141	mws4134	611.15	-	-	612.121	[M-H]-	Oxidized Glutathione	Amino acids and derivatives	84461	66038	51693	9	9	9	9	9	9	9	9	9	9	9	9	9	9	9	75090	72789	50501	-
1142	pmb3264	611.1	-	-	612.152	[M-H]-	Oxiglutatione	Amino acids and derivatives	114530	129220	85236	9	9	9	9	9	9	9	9	9	9	9	9	9	9	9	114680	146940	116910	C00127
1143	Lmhp003217	625.17	-	-	624.169	[M+H]+	2'-Hydoxy,5-methoxy Genistein-O-rhamnosyl-glucoside	Flavonoids	15724000	13240000	13777000	9	9	9	9	9	9	9	9	9	9	9	9	9	9	9	15847000	15773000	18908000	-
1144	Lmnp002584	625.18	-	-	624.169	[M+H]+	5,7,4'-Trihydroxy-6-methoxyflavone-8-C-[β-D-glucosyl-(1-2)]-β-D-glucoside	Flavonoids	1476400	1581100	1515900	9	9	9	9	9	9	9	9	9	9	9	9	9	9	9	2308700	1350700	1489400	-
1145	Hmcp001859	625.17	-	-	624.17	[M+H]+	Isorhamnetin-O-rutinoside	Flavonoids	1947900	1355600	1408800	9	9	9	9	9	9	9	9	9	9	9	9	9	9	9	1939800	1331200	1394100	-
1146	pmp001253	625.25	-	-	624.219	[M+H]+	Cannabisin F	Alkaloids	1423900	1371100	1326000	9	9	9	9	9	9	9	9	9	9	9	9	9	9	9	1330600	1536000	1320500	C17910
1147	pmp001187	625.3	-	-	624.219	[M+H]+	1-(Dihydroxyphenyl)-N2,N3-bis(4-hydroxyphenethyl)-(5-8)-dimethoxy-1,2dihydronaphthalene-2,3-dicarboxamide	Alkaloids	570440	532890	551830	9	9	9	9	9	9	9	9	9	9	9	9	9	9	9	451550	657080	506480	-
1148	pmp001254	625.25	-	-	624.219	[M+H]+	Grossamide	Alkaloids	2431300	2367800	2336100	9	9	9	9	9	9	9	9	9	9	9	9	9	9	9	2151400	3066300	2184600	-
1149	pmp000596	627.15	-	-	626.12	[M+H]+	Quercetin-3,7-O-β-D-diglucoside	Flavonoids	6310800	6594600	4957800	9	9	9	9	9	9	9	9	9	9	9	9	9	9	9	5886300	6462400	6095900	-
1150	pme3486	625.15	-	-	626.148	[M-H]-	Myricetin 3-O-rutinoside	Flavonoids	155910	153460	153440	9	9	9	9	9	9	9	9	9	9	9	9	9	9	9	159750	114880	146490	-
1151	pmf0116	627.16	-	-	627.156	[M]+	Delphinidin 3,5-O-diglucoside	Flavonoids	8961.8	8888.8	12053	9	9	9	9	9	9	9	9	9	9	9	9	9	9	9	7764.6	5938.5	7368.7	C16312
1152	pmn001723	632.29	-	-	633.255	[M-H]-	Lycibarbarspermidine A	Alkaloids	5326	9117.4	12458	9	9	9	9	9	9	9	9	9	9	9	9	9	9	9	4988.5	10293	12536	-
1153	pmn001722	634.3	-	-	635.27	[M-H]-	Lycibarbarspermidine I	Alkaloids	11461	11948	12763	9	9	9	9	9	9	9	9	9	9	9	9	9	9	9	9183	11447	13700	-
1154	Hmyp007792	636.41	-	-	635.414	[M+H]+	PE(oxo-11:0/16:0)	Lipids	85129	99152	94915	9	9	9	9	9	9	9	9	9	9	9	9	9	9	9	115800	128290	99711	-
1155	pmp001179	643.3	-	-	642.228	[M+H]+	(E)-2-(4,5-Dihydroxy-2-(3-((4-hydroxyphenethyl)amino)-3-oxopropyl)phenyl)-3-(4-hydroxy-3,5-dimethoxyphenyl)-N-(4-hydroxyphenethyl)acrylamide	Alkaloids	5625.8	3981.9	4821.8	9	9	9	9	9	9	9	9	9	9	9	9	9	9	9	6522.8	7003.2	5873.9	-
1156	pmp001190	655.3	-	-	654.228	[M+H]+	(5-8)-Hydroxy-1-(hydroxylmethoxyphenyl)-N2,N3-bis(4-hydroxyphenethyl)-(5-8)-dimethoxy-1,2-dihydronaphthalene-2,3-dicarboxamide	Alkaloids	191240	185520	183500	9	9	9	9	9	9	9	9	9	9	9	9	9	9	9	159620	209560	193180	-
1157	Hmyn005706	653.38	-	-	654.38	[M-H]-	DMGM(16:0)	Lipids	122040	144550	135940	9	9	9	9	9	9	9	9	9	9	9	9	9	9	9	99402	118830	122690	-
1158	pmp001275	672.42	-	-	671.363	[M+H]+	3-Hydroxypropyl palmitate glc-glucosamine	Alkaloids	1414500	1277100	1402200	9	9	9	9	9	9	9	9	9	9	9	9	9	9	9	1284200	1628800	1498700	-
1159	pmp001276	677.37	-	-	676.324	[M+H]+	2,3-Dihydroxypropyl-9,12,15-octadecatrienoate-hexose-hexose	Lipids	635940	664850	700790	9	9	9	9	9	9	9	9	9	9	9	9	9	9	9	615680	679250	840310	-
1160	pmp001271	679.39	-	-	678.339	[M+H]+	2,3-Dihydroxypropyl-9,12-octadecadienoate-hexose-hexose	Lipids	34436	25605	51278	9	9	9	9	9	9	9	9	9	9	9	9	9	9	9	35290	40804	45290	-
1161	pmn001370	681.24	-	-	682.212	[M-H]-	Pinoresinol diglucoside	Lignans and Coumarins	903430	690420	818740	9	9	9	9	9	9	9	9	9	9	9	9	9	9	9	886090	973310	767180	-
1162	Hmyp007396	702.46	-	-	701.46	[M+H]+	PC(oxo-11:0/18:2)	Lipids	165200	157230	161670	9	9	9	9	9	9	9	9	9	9	9	9	9	9	9	156900	204670	151660	-
1163	pme3005	74.05	-	-	73.053	[M+H]+	N,N-Dimethylformamide	Others	19440	12855	16680	9	9	9	9	9	9	9	9	9	9	9	9	9	9	9	16074	17123	12597	C03134
1164	Hmyp007589	784.47	-	-	783.466	[M+H]+	PE(18:3/18:3+O3)	Lipids	9482.1	11751	12363	9	9	9	9	9	9	9	9	9	9	9	9	9	9	9	11305	10027	9316.7	-
1165	pme2746	784.2	-	-	785.122	[M-H]-	Flavin adenine dinucleotide(FAD)	Nucleotides and derivatives	136090	115490	133840	9	9	9	9	9	9	9	9	9	9	9	9	9	9	9	99220	114060	111180	C00016
1166	pmb0782	86.1	-	-	85.1	[M+H]+	Piperidine	Alkaloids	16720	19428	14308	9	9	9	9	9	9	9	9	9	9	9	9	9	9	9	17022	23805	20216	C01746
1167	pmp001173	874.4	-	-	873.322	[M+H]+	Lyciumin A	Alkaloids	8127.1	10290	7985.3	9	9	9	9	9	9	9	9	9	9	9	9	9	9	9	11454	9401.4	10168	-
1168	pmf0291	96	-	-	95.093	[M+H]+	4-Hydroxypyridine	Alkaloids	154420	170370	131150	9	9	9	9	9	9	9	9	9	9	9	9	9	9	9	184800	149920	200480	-
1169	pme1682	99.07	-	-	98.073	[M+H]+	trans-2-Hexenal	Others	14045	13586	8728.6	9	9	9	9	9	9	9	9	9	9	9	9	9	9	9	17607	19262	14309	C08497
